# Supplementary material
Source: publisher figshare collection journal article supplement (https://acs.figshare.com/ndownloader/files/3626091)
Supplement: Supplementary file 1 [file 3626091]

## Sheet: Elem. Composition
	Extractives extend the applicability of multistep kinetic scheme of biomass pyrolysis
	Paulo Eduardo Amaral Debiagi, Chiara Pecchi, Giancarlo Gentile, Alessio Frassoldati, Alberto Cuoci, Tiziano Faravelli, Eliseo Ranzi
	Supplemental Material
	CRECK BIOMASS DATABASE							Experimental Data
	Samples Description							DRY - C+H+N+S+Cl+O+Ash=100%								DAF - C+H+O=100%						Predicted Biochemical composition								Splitting Parameters
	CATEGORY	SUBCAT	SAMPLE	VARIETY	ORGAN / FRACTION	TAXONOMY		C	H	N	S	Cl	O	Ash		C	H	O		REF.		CELL	HCELL	LIGH	LIGO	LIGC	TRIL	CTANN		α	β	γ	δ	ε
	GRASS PLANTS	Grass	Hemp (canhamo)	-	Whole crop	Cannabis sativa		45.4995	5.63798	1.18694	0.098912	0.197824	42.5321	4.84669		48.5744	6.01901	45.4065		IEABCC		0.437986	0.316487	0.0022775	0.15799	0.0022955	0.030508	0.0524566		0.529992	0.143721	0.978041	0.689284	0.914025
	WASTE MATERIALS	Other waste	Paper	-				43.4	5.8	0.3	0.2	0	44.3	6		46.4171	6.20321	47.3797		BIOBIB		0.471949	0.449991	0.0313269	0.0162693	6.99e-05	0.0212334	0.009161		0.460793	0.999757	0.99347	0.752025	0.56289
	GRASS PLANTS	Grass	Sunflower	-	Husk (seed)	Helianthus		48.5892	5.94049	0.834932	0.211132	0	40.3838	4.0404		51.1931	6.25885	42.548		PHYLLIS 2		0.396452	0.346248	0.0555034	0.0444768	0.0104322	0.146888	0		0.482658	1	0.722726	0.437104	1
	GRASS PLANTS	Grass	SugarCane	-	-	Saccharum officinarum		44.8	5.35	0.38	0.01	0.12	39.55	9.79		49.9443	5.96433	44.0914		BIOBIB		0.423106	0.367774	0.0359308	0.0488665	0.004139	0.120184	0		0.483846	1	0.878317	0.380569	1
	GRASS PLANTS	Grass	Mixed	wheat + barley	-	-		44.6851	6.0369	0.621741	0.0701966	0	43.6121	4.97393		47.369	6.39949	46.2315		PHYLLIS 2		0.482799	0.415267	0.0106543	0.0261023	0	0.0611658	0.0040116		0.486474	1	1	0.263602	0.824171
	GRASS PLANTS	Grass	Cardoon	-	-	Cynara cardunculus		43.65	5.82	1.14321	0.124714	0	38.8693	10.3928		49.4118	6.58824	44		PHYLLIS 2		0.433135	0.370464	0.0263197	0.0625184	0.0024953	0.103677	0.0013907		0.487877	1	0.938717	0.342839	0.97183
	GRASS PLANTS	Vegetables	Brassica	-	-	Brassicaceae		46.4906	6.12511	0.702882	0.492017	0	38.4577	7.7317		51.0474	6.72547	42.2271		PHYLLIS 2		0.39774	0.337144	0.0435845	0.0719388	0.0163319	0.133261	0		0.490125	1	0.729216	0.401959	1
	WOOD PLANTS	Hardwood	Hazelnut	-	Seedcoat	Corylus		50.08	5.3	1.28	0	0	41.54	1.8		51.6715	5.46843	42.8601		PHYLLIS 2		0.385095	0.326142	0.0526	0.0685831	0.0225651	0.145014	0		0.490342	1	0.650127	0.42707	1
	WASTE MATERIALS	Food industry waste	Sugar beet	altissima		Beta vulgaris		44.5	5.9	1.84	0.13	0.05	42.78	4.8		47.757	6.33183	45.9111		BIOBIB		0.469215	0.396502	0.0773483	0.0051587	2.77e-05	0.0487823	0.0029653		0.490897	0.999892	0.992854	0.765192	0.557967
	WASTE MATERIALS	Food industry waste	Beet	-	Pulp			38.4521	5.13513	1.38411	0	0	36.9287	18.1		47.7571	6.37778	45.8651		PHYLLIS 2		0.464982	0.392756	0.0706228	0.0171591	8.34e-05	0.0445327	0.0098643		0.491005	0.999811	0.992854	0.765238	0.557938
	GRASS PLANTS	grass	Grass	-	Chaff (seed)	-		40.6952	5.40567	1.66404	0.177235	0	37.2095	14.8484		48.8477	6.48859	44.6638		PHYLLIS 2		0.444285	0.374313	0.0185612	0.0708155	0	0.0869638	0.0050624		0.491646	1	1	0.30489	0.909723
	GRASS PLANTS	Grass	Napier grass	-	-	Poaceae		45.2	6	0	0	0	43.1	5.7		47.9321	6.36267	45.7052		PHYLLIS 2		0.46605	0.387633	0.0103448	0.0637224	0	0.0623878	0.0098623		0.49486	1	1	0.254153	0.82315
	GRASS PLANTS	Grass	Sorghum	-	Straw (Millet)	Sorghum		43.71	5.85	0.01	0	0	45.16	5.27		46.1465	6.1761	47.6774		PHYLLIS 2		0.509885	0.424053	0.0022973	0.031829	0	0.0215125	0.0104232		0.494883	1	1	0.179959	0.687481
	GRASS PLANTS	Grass	Verge grass	-	-	Poaceae		44.7712	5.88117	1.74629	0.13047	0	39.0405	8.43035		49.9161	6.55701	43.5269		PHYLLIS 2		0.41938	0.348663	0.025605	0.0915313	0.0088158	0.103916	0.0020897		0.494969	1	0.863903	0.336152	0.973351
	GRASS PLANTS	Grass	Rice	-	Hull	Oryza sativa		38.68	5.14	0.41	0.05	0.12	37.45	18.15		47.5944	6.3246	46.081		BIOBIB		0.474243	0.393696	0.0082584	0.0586891	0	0.054225	0.0108878		0.495337	1	1	0.238374	0.795212
	GRASS PLANTS	Vegetables	Beet	-	Slices	Beta		44.5554	5.89411	1.7982	0.0999001	0.0999001	42.7572	4.7952		47.8028	6.32369	45.8735		IEABCC		0.46835	0.385949	0.0086736	0.0683654	0	0.0564724	0.0121899		0.497179	1	1	0.23991	0.801593
	GRASS PLANTS	Grass	Hemp (canhamo)	-	Crushed baled	Cannabis sativa		43.9819	5.77263	1.3548	0.166896	0	40.1433	8.5804		48.9243	6.42132	44.6544		PHYLLIS 2		0.439831	0.360792	0.0151927	0.0943361	0.0009775	0.079511	0.0093595		0.498324	1	0.983334	0.281956	0.880724
	GRASS PLANTS	Grass	Rice	-	Bran	Oryza		39.919	5.24855	1.2433	0	0	37.7078	15.8814		48.1675	6.33306	45.4994		PHYLLIS 2		0.458232	0.374017	0.009739	0.0831592	0	0.0614264	0.0134261		0.49957	1	1	0.245751	0.816914
	GRASS PLANTS	Grass	Wheat	-	Straw Pellets	Triticum		45.1591	5.88592	0.734593	0.146919	0	40.3842	7.68925		49.3924	6.43768	44.1699		PHYLLIS 2		0.428721	0.348318	0.0171824	0.105749	0.0055492	0.0856539	0.0088263		0.500724	1	0.920953	0.291909	0.903584
	GRASS PLANTS	Grass	Rape (Canola-colza)	-	Straw	Brassica		46.1162	6.0102	1.76603	0.208885	0	41.0175	4.88121		49.5107	6.4526	44.0367		PHYLLIS 2		0.426068	0.345907	0.0179739	0.107183	0.0068352	0.087778	0.0082542		0.500909	1	0.905545	0.296172	0.91174
	GRASS PLANTS	Grass	Chinese straw	-	Pellets	-		37.071	4.88848	0.91659	0.295346	0	37.1728	19.6558		46.8468	6.17761	46.9755		PHYLLIS 2		0.491167	0.398574	0.0032543	0.0597854	4.5e-06	0.0295163	0.0176984		0.501024	0.99767	1	0.185075	0.708748
	GRASS PLANTS	Grass	Miscanthus	Giganteus	-	Miscanthus		48.463	6.3082	0.300391	0.10013	0	43.3263	1.50195		49.4029	6.43054	44.1666		PHYLLIS 2		0.428178	0.346549	0.0166903	0.108587	0.0059155	0.0845491	0.0095313		0.50168	1	0.918185	0.288597	0.899379
	WASTE MATERIALS	Food industry waste	Palm oil - Empty fruit bunches					45.53	5.46	0.45	0.04	0	43.4	5.12		48.236	5.78451	45.9794		PHYLLIS 2		0.410355	0.331932	0.0019412	0.160723	0.0007275	0.0011932	0.0931278		0.501824	0.998863	0.992664	0.769962	0.556037
	GRASS PLANTS	Grass	Hemp (canhamo)	Fan Dried	-	Cannabis sativa		44.9956	5.86578	0.988407	0.120087	0	41.4761	6.55397		48.7295	6.35254	44.918		PHYLLIS 2		0.442554	0.35666	0.0116827	0.105406	0	0.0695501	0.0141472		0.502747	1	1	0.256615	0.842948
	GRASS PLANTS	Grass	Corn	-	Cob	Zea mays		45.8742	6.01104	0.611786	0.0776871	0	45.0682	2.35704		47.3157	6.19992	46.4844		PHYLLIS 2		0.478558	0.384671	0.0043747	0.0753358	1.62e-05	0.037222	0.0198221		0.503399	0.993764	1	0.195525	0.732468
	GRASS PLANTS	Grass	Hemp (canhamo)	Dried in field	-	Cannabis sativa		45.3052	5.91224	0.554566	0.0939943	0	42.9178	5.21618		48.1278	6.28058	45.5916		PHYLLIS 2		0.457785	0.367736	0.0079621	0.0936818	0	0.0552361	0.0175998		0.50356	1	1	0.22853	0.793153
	GRASS PLANTS	Grass	Intensive Grass	-	-	Poaceae		43.5583	5.62372	2.14724	0.306748	0.613497	37.6278	10.1227		50.1767	6.47821	43.3451		IEABCC		0.411135	0.329425	0.0210917	0.119739	0.0164425	0.09604	0.0061265		0.504194	1	0.816587	0.31097	0.94518
	GRASS PLANTS	Grass	Barley	-	straw	Hordeum		43.7029	5.71006	0.770627	0.148555	0	42.7558	6.91203		47.4161	6.19523	46.3886		PHYLLIS 2		0.47587	0.381152	0.0044945	0.0795907	2.26e-05	0.0382073	0.0206632		0.504288	0.99157	1	0.196012	0.735083
	GRASS PLANTS	Grass	Water hyacinth	-	-	Eichhornia		40.0523	5.12953	2.5567	0.314547	0	31.8096	20.1373		52.0218	6.66248	41.3157		PHYLLIS 2		0.376786	0.301295	0.0396484	0.106119	0.0463348	0.129817	0		0.504698	1	0.583369	0.385615	1
	GRASS PLANTS	Grass	Triticale	-	-	Poaceae Triticeae		-	-	-	-	-	-	-		46.6321	6.11399	47.2539		IEABCC		0.495373	0.395413	0.001747	0.0652667	1.92e-05	0.0191629	0.0230177		0.505146	0.98173	1	0.160252	0.671338
	GRASS PLANTS	Grass	Rice	Wild	Hull	Oryza		47.2286	6.07397	1.21279	0.420968	0	40.1423	4.92132		50.5417	6.50005	42.9583		PHYLLIS 2		0.403465	0.321461	0.0231522	0.124092	0.0228694	0.100814	0.004147		0.505604	1	0.768379	0.320628	0.965582
	GRASS PLANTS	Grass	Bermuda Grass	-	Straw	Poaceae		44.3564	5.74257	0.891089	0.594059	0.891089	40.6931	6.83168		48.855	6.32497	44.8201		IEABCC		0.438471	0.348253	0.0107361	0.116641	0.0015171	0.0672432	0.0171378		0.506392	0.99713	0.979414	0.247585	0.8335
	GRASS PLANTS	Grass	Rice	-	Straw	Oryza		39.3279	4.71017	0.794586	0.114683	0	37.0506	18.002		48.4998	5.80867	45.6915		PHYLLIS 2		0.426347	0.336873	0.0399532	0.108818	0.0005189	0.0241948	0.063295		0.507687	0.999222	0.992533	0.772529	0.555122
	WOOD PLANTS	Hardwood	Palm	-	Kernel (hexane extracted)	Arecaceae (Palmaceae)		47.2794	6.24618	2.83269	0.234359	0	38.8221	4.58529		51.1972	6.76376	42.0391		PHYLLIS 2		0.390565	0.308297	0.027217	0.128217	0.0365163	0.109188	0		0.507934	1	0.682203	0.338736	1
	GRASS PLANTS	Grass	Oat	-	Bran	Avena		-	-	-	-	-	-	-		47.5564	6.17221	46.2714		PHYLLIS 2		0.470997	0.371527	0.0039999	0.0919997	4.88e-05	0.036444	0.0249835		0.508109	0.979806	1	0.187123	0.726233
	WOOD PLANTS	Hardwood	Walnut	-	Blows	Junglans		53.6607	6.5013	1.34027	0.10002	0	36.0372	2.36047		55.7808	6.75816	37.461		PHYLLIS 2		0.314175	0.247764	0.103021	0.0233345	0.122604	0.189101	0		0.508169	1	0.104231	0.528208	1
	GRASS PLANTS	Grass	Sunflower	-	Spelt	Helianthus		55.3439	6.87831	1.48148	0.10582	0.10582	32.6984	3.38624		58.3055	7.24638	34.4482		IEABCC		0.25216	0.198457	0.191341	0	0.128146	0.229895	0		0.508673	1	0	0.631052	1
	GRASS PLANTS	Garden Plants	Gerbera	-	flowers	Gerbera		43.98	6.74	1.47	0.11	0	34.74	12.96		51.4627	7.88673	40.6506		PHYLLIS 2		0.385712	0.302764	0.028625	0.128065	0.0427938	0.11204	0		0.509335	1	0.646593	0.344281	1
	GRASS PLANTS	Grass	Switchgrass	Cave-in-Rock high yield	-	Panicum virgatum		-	-	-	-	-	-	-		47.0452	6.10144	46.8534		NREL		0.483666	0.379081	0.0020371	0.083911	3.75e-05	0.0227134	0.0285543		0.509711	0.969819	1	0.159696	0.679173
	GRASS PLANTS	Grass	Hemp (canhamo)	-	-	Cannabis sativa		46.7402	6.01805	0.702106	0.100301	0.100301	43.33	3.00903		48.643	6.26305	45.0939		IEABCC		0.442034	0.346386	0.0081613	0.122763	7.96e-05	0.0584762	0.0221005		0.509759	0.983775	1	0.225734	0.800061
	WOOD PLANTS	Hardwood	Olive	-	Pruning	Olea		40.15	5.65535	0.582313	0.069088	0	40.4165	13.1267		46.5659	6.55907	46.875		PHYLLIS 2		0.495883	0.388455	0.0008708	0.073708	1.86e-05	0.0114608	0.0296036		0.509841	0.965128	1	0.139259	0.642042
	GRASS PLANTS	Grass	Sorghum	-	Stalk	Sorghum		-	-	-	-	-	-	-		46.5658	6.05355	47.3807		PHYLLIS 2		0.495883	0.388455	0.0008708	0.073708	1.86e-05	0.0114608	0.0296036		0.509841	0.965128	1	0.139259	0.642042
	GRASS PLANTS	Grass	Switchgrass	Alamo	-	Panicum virgatum		-	-	-	-	-	-	-		49.5385	5.9907	44.4708		NREL		0.422649	0.33107	0.0130849	0.130642	0.0101773	0.0761916	0.0161855		0.509853	0.991377	0.887643	0.262535	0.86756
	GRASS PLANTS	Grass	Mixed	Wheat+Rye	Straw	-		47.49	6.07	0.48	0.11	0	41.3	4.55		50.0633	6.3989	43.5378		BIOBIB		0.411903	0.322367	0.0164156	0.133618	0.017762	0.0857681	0.012166		0.510075	0.995224	0.821788	0.283264	0.905905
	WOOD PLANTS	Hardwood	Coconut	-	Fiber dust	Cocos		50.6445	5.0856	0.453172	0.161128	0	39.9094	3.74622		52.9536	5.31747	41.729		PHYLLIS 2		0.361159	0.282451	0.0452436	0.100378	0.0727865	0.137983	0		0.510253	1	0.457444	0.40257	1
	WOOD PLANTS	Unidentified	Unidentified	-	Bark Mixed	-		48.83	4.6	0.33	0.08	0.04	41.04	5.08		51.6884	4.86927	43.4424		BIOBIB		0.381513	0.297059	0.0291324	0.129451	0.0496636	0.113181	0		0.511353	1	0.614434	0.345962	1
	WOOD PLANTS	Softwood	Pine	-	Chips (wood)	Pinus		43.0267	5.83581	0.49456	0	0	36.1029	14.5401		50.6403	6.86845	42.4913		IEABCC		0.400182	0.311174	0.0196211	0.137913	0.0287425	0.0941039	0.0082632		0.51169	0.994841	0.746172	0.301046	0.941565
	GRASS PLANTS	Grass	Oat	-	Hull	Avena		45.28	5.8175	1.11231	0.147652	0	42.8093	4.83315		48.218	6.19497	45.587		PHYLLIS 2		0.452428	0.351136	0.0053885	0.11757	9.25e-05	0.0459468	0.0274386		0.512163	0.971806	1	0.198718	0.755305
	GRASS PLANTS	Grass	Hemp (canhamo)	-	Sillage	Cannabis sativa		45.8684	5.83514	1.1232	0.146107	0	39.4488	7.5783		50.3206	6.40152	43.2779		PHYLLIS 2		0.406211	0.315023	0.0167973	0.139157	0.0233446	0.0874281	0.0120388		0.512356	0.989737	0.785433	0.285164	0.913805
	GRASS PLANTS	Grass	Corn	-	Stover (densified - no binder)	Zea mays		37.8	4.84	0.65	0.09	0	35.05	21.57		48.6549	6.22989	45.1152		PHYLLIS 2		0.441039	0.341886	0.0071626	0.129078	0.0004561	0.0550128	0.0253658		0.512463	0.974588	0.995639	0.215403	0.786407
	GRASS PLANTS	Grass	Sunflower	-	Shells (seed)	Helianthus		52.7944	6.58683	1.39721	0.199601	0.0998004	35.9281	2.99401		55.3927	6.91099	37.6963		IEABCC		0.323584	0.250739	0.0837579	0.0364239	0.129812	0.175683	0		0.512561	1	0.146426	0.494887	1
	GRASS PLANTS	Grass	Switchgrass	Cave-in-Rock	-	Panicum virgatum		-	-	-	-	-	-	-		47.4353	6.08778	46.4769		NREL		0.472506	0.364014	0.0022813	0.101727	5.84e-05	0.025885	0.0335283		0.514012	0.958544	1	0.15892	0.686095
	GRASS PLANTS	Grass	Switchgrass	Blackwell	-	Panicum virgatum		-	-	-	-	-	-	-		46.6522	6.00938	47.3384		NREL		0.49288	0.379705	0.0005254	0.0832583	1.58e-05	0.0078483	0.0357665		0.514015	0.951582	1	0.126302	0.626436
	GRASS PLANTS	Grass	Kenaf	-	-	Hibiscus		46.2676	5.89587	1.04927	0.139902	0	42.1855	4.46188		49.0388	6.24901	44.7122		PHYLLIS 2		0.432023	0.332645	0.0083298	0.13641	0.005102	0.0606345	0.0248554		0.514148	0.972286	0.943849	0.225025	0.807275
	WOOD PLANTS	Hardwood	Oak	-	Chips	Quercus		48.99	5.93	0.33	0.05	0.02	42.58	2.1		50.2462	6.08205	43.6718		BIOBIB		0.407134	0.313234	0.0150874	0.143087	0.0232595	0.0834229	0.0147752		0.514346	0.982321	0.791109	0.274496	0.898151
	GRASS PLANTS	Grass	Rape (Canola-colza)	-	Whole crop	Brassica napus		50.46	6.26	2.07	0.53	0.45	33.63	6.6		55.8495	6.92861	37.2219		BIOBIB		0.317956	0.24412	0.0889725	0.022352	0.147392	0.179207	0		0.51486	1	0.0848483	0.50502	1
	GRASS PLANTS	Grass	Alfalfa	-	Stalks	Medicago sativa		45.35	5.75	2.04	0.1	0	40.24	6.52		49.6497	6.29516	44.0552		PHYLLIS 2		0.419033	0.321326	0.0109957	0.14266	0.0136664	0.0710351	0.0212838		0.51517	0.974152	0.866017	0.246162	0.847921
	WOOD PLANTS	Hardwood	Hickory	-	-	Carya		49.7	6.5	0	0	0	43.1	0.7		50.0504	6.54582	43.4038		BIOBIB		0.410869	0.315033	0.0133341	0.14432	0.0202139	0.0785941	0.0176358		0.515196	0.977649	0.814962	0.262877	0.878546
	GRASS PLANTS	Grass	Switchgrass	Trailblazer	-	Panicum virgatum		-	-	-	-	-	-	-		46.5354	5.98485	47.4798		NREL		0.495349	0.379111	0.0001893	0.0836084	6.5e-06	0.0031575	0.0385778		0.515655	0.94501	1	0.115341	0.609566
	GRASS PLANTS	Grass	Hemp (canhamo)	-	Fiber	Cannabis sativa		47.8715	6.07222	0.637632	0.0294292	0	43.4179	1.97138		49.1688	6.23678	44.5945		PHYLLIS 2		0.428675	0.327423	0.0081517	0.141536	0.0072536	0.0605314	0.0264295		0.516157	0.966578	0.924301	0.222589	0.806716
	GRASS PLANTS	Grass	Hemp (canhamo)	Fresh	-	Cannabis sativa		45.7133	5.82148	0.547238	0.0943514	0	42.9016	4.9221		48.4064	6.16445	45.4291		PHYLLIS 2		0.445886	0.340192	0.0048823	0.132147	0.0001238	0.0446213	0.0321479		0.516434	0.958903	1	0.18995	0.747551
	GRASS PLANTS	Grass	Panicum	-	-	Panicum maximum		42.2211	5.3927	0.46023	0.10005	0	41.2206	10.6053		47.5279	6.0705	46.4016		PHYLLIS 2		0.469305	0.357926	0.0020708	0.108966	6.34e-05	0.0247689	0.0369006		0.516527	0.950796	1	0.153047	0.68023
	GRASS PLANTS	Grass	Switchgrass	EYxFF-L	-	Panicum virgatum		-	-	-	-	-	-	-		46.5463	5.97006	47.4837		NREL		0.494886	0.377309	0.0001242	0.0854157	4.5e-06	0.0021476	0.0401129		0.516611	0.941835	1	0.112029	0.605361
	WASTE MATERIALS	Grass plant waste	Unidentified		Bagasse			45.5194	5.68408	0.55158	0.0841394	0	41.8547	6.30613		48.915	6.1081	44.9769		PHYLLIS 2		0.426472	0.324582	0.0599387	0.096554	0.0004799	0.035453	0.0565199		0.517047	0.999318	0.99234	0.776623	0.553599
	GRASS PLANTS	Grass	Switchgrass	Kanlow	-	Panicum virgatum		-	-	-	-	-	-	-		47.797	6.08288	46.1201		NREL		0.461706	0.35002	0.0025122	0.11882	8.14e-05	0.0289313	0.0379292		0.518028	0.948062	1	0.158406	0.692943
	WOOD PLANTS	Hardwood	Grape	-	Pruning	Vitis		47.8756	4.97409	0.932642	0	0	44.1451	2.07254		49.359	5.12821	45.5128		IEABCC		0.423999	0.320581	0.0080429	0.147675	0.010639	0.0608581	0.0282052		0.518692	0.959604	0.896364	0.220593	0.80798
	GRASS PLANTS	Grass	Corn	-	Stemps	Zea mays		47.09	5.97	0.74	0	0.05	44.42	1.73		48.3073	6.12433	45.5683		BIOBIB		0.4477	0.338044	0.0038441	0.134701	0.0001219	0.0390538	0.0365348		0.519029	0.949156	1	0.175677	0.726475
	GRASS PLANTS	Grass	Cane	Italy	-	Arundo donax		47.7	6	0.5	0.16	0.29	41.65	3.7		50.0262	6.29261	43.6812		BIOBIB		0.410304	0.309396	0.0110875	0.151912	0.0219078	0.0725796	0.0228142		0.519361	0.96325	0.810905	0.245803	0.855393
	GRASS PLANTS	Grass	alfalfa	-	Stem	Medicago sativa		43	5.47	2.55	0.18	0.46	43.53	4.81		46.7391	5.94565	47.3152		BIOBIB		0.489325	0.368003	0.0001096	0.095153	4.7e-06	0.0020305	0.0453737		0.520024	0.931819	1	0.106411	0.601705
	GRASS PLANTS	Grass	Wheat	-	Straw	Triticum		45.2762	5.60821	0.634539	0.149303	0	41.4037	6.92801		49.0597	6.07685	44.8635		PHYLLIS 2		0.400941	0.301185	0.0249355	0.162285	0.0007877	0.0146346	0.0952308		0.520312	0.998881	0.992287	0.778048	0.553005
	GRASS PLANTS	Grass	Switchgrass	EYxFF-H	-	Panicum virgatum		-	-	-	-	-	-	-		46.7441	5.94043	47.3155		NREL		0.489016	0.366509	5.38e-05	0.0965511	2.4e-06	0.0010339	0.0468332		0.520882	0.928932	1	0.10326	0.597607
	WOOD PLANTS	Hardwood	Willow	-	Chips (wood)	Salix		49.2507	5.99401	0.599401	0.0999001	0	42.6573	1.3986		50.3061	6.12245	43.5714		IEABCC		0.40457	0.303137	0.0118385	0.154974	0.0280934	0.0755048	0.0218812		0.520949	0.960305	0.773125	0.251235	0.86841
	GRASS PLANTS	Grass	Rice	-	-	Oryza sativa		37.86	4.75	0.23	0.31	0	33.48	23.37		49.7569	6.24261	44.0005		BIOBIB		0.415186	0.310613	0.0088477	0.15435	0.0179854	0.0649295	0.0280875		0.521333	0.954126	0.841804	0.226902	0.824643
	GRASS PLANTS	Grass	Sunflower	-	Shell	Helianthus		49.4063	6.14198	1.18784	0.125544	0	39.7394	3.39898		51.8496	6.44573	41.7047		PHYLLIS 2		0.377867	0.282575	0.0217159	0.147778	0.066234	0.100616	0.0032138		0.521438	0.972269	0.578355	0.313275	0.98284
	GRASS PLANTS	Grass	Miscanthus	-	-	Miscanthus		48.1675	6.02949	0.494315	0.220202	0	42.2896	2.79891		49.9214	6.24905	43.8295		PHYLLIS 2		0.411894	0.30749	0.0093894	0.155776	0.0210618	0.0671799	0.0272095		0.521868	0.953714	0.820803	0.231457	0.834014
	GRASS PLANTS	Other	Unidentified	-	Straw	-		45.6255	5.7307	0.507057	0.124372	0	41.7891	6.22322		48.9832	6.15242	44.8644		PHYLLIS 2		0.430953	0.321172	0.0052893	0.151035	0.0062964	0.0487795	0.0364746		0.522293	0.943988	0.937931	0.190974	0.760787
	WOOD PLANTS	Hardwood	Maple	-	Leaves	Acer		49.88	6.08878	0.139972	0.029994	0	43.2613	0.59988		50.267	6.13602	43.597		PHYLLIS 2		0.405044	0.301811	0.0109484	0.157138	0.028039	0.0729115	0.0241083		0.522335	0.95522	0.775976	0.244172	0.858176
	GRASS PLANTS	Grass	Sunflower	-	Stem	Helianthus		44.1	5	0.7	0.1	0.7	39.4	10		49.8305	5.64972	44.5198		IEABCC		0.413453	0.307484	0.0085719	0.156978	0.0198359	0.0642487	0.0294279		0.522815	0.949685	0.830646	0.224028	0.822261
	GRASS PLANTS	Grass	Flax	-	Stalk	Linum		49.1	6.1	1.3	0.12	0	40.45	2.93		51.333	6.37742	42.2896		PHYLLIS 2		0.386086	0.286973	0.016904	0.154628	0.053228	0.0902032	0.0119776		0.522953	0.962493	0.641469	0.285776	0.935475
	GRASS PLANTS	Grass	Corn	-	Stalk	Zea mays		44.771	5.63643	1.0745	0.131957	0	42.933	5.4531		47.9653	6.03857	45.9962		PHYLLIS 2		0.455781	0.338711	0.0020344	0.132235	8.71e-05	0.0262518	0.0448995		0.523002	0.932539	1	0.145867	0.679653
	WASTE MATERIALS	Grass plant waste	Cane		Trash			46.9953	5.89941	0.69993	0.109989	0	40.7959	5.49945		50.1601	6.29669	43.5432		PHYLLIS 2		0.406975	0.302315	0.0100306	0.158213	0.026229	0.0698929	0.0263452		0.523106	0.951613	0.788616	0.236597	0.845815
	GRASS PLANTS	Grass	Canary grass	reed	-	Phalaris arundinacea		46.3658	5.79802	0.75249	0.0848389	0	41.3086	5.69019		49.6037	6.20291	44.1934		PHYLLIS 2		0.417812	0.31001	0.0073583	0.156934	0.0161179	0.0592774	0.0324907		0.523391	0.945725	0.858085	0.212436	0.802175
	WOOD PLANTS	Softwood	Pine	Ponderosa	Untreated Wood	Pinus ponderosa		50.2191	6.17391	0.159584	0.019948	0	43.1675	0.26		50.4408	6.20116	43.358		PHYLLIS 2		0.401568	0.297438	0.0111314	0.159362	0.0324304	0.0739113	0.0241582		0.523826	0.951632	0.752206	0.245414	0.863341
	GRASS PLANTS	Grass	Switchgrass	-	-	Panicum virgatum		45.4881	5.7	0.587725	0.130606	0	41.8871	6.20648		48.8724	6.12409	45.0035		PHYLLIS 2		0.432881	0.320495	0.0044518	0.152662	0.0051709	0.0444563	0.0398835		0.523932	0.937416	0.949201	0.180013	0.743915
	WASTE MATERIALS	Wood waste	Demolition wood					48.85	5.8	0.18	0.01	0	44.58	0.58		49.2291	5.84501	44.9259		BIOBIB		0.397558	0.294223	0.0276107	0.16605	0.0008155	0.0160525	0.0976896		0.524034	0.99886	0.992212	0.779675	0.552391
	GRASS PLANTS	Grass	Sorghum	Sweet Sorghum	Straw	Sorghum		47.1702	5.8762	0.396785	0.0850254	0	41.3224	5.1494		49.985	6.22685	43.7882		PHYLLIS 2		0.410222	0.303477	0.008731	0.159413	0.0232019	0.0652476	0.0297076		0.524131	0.946519	0.809672	0.225124	0.826819
	GRASS PLANTS	Grass	Millet	-	Husk	-		46.9953	5.79942	1.19988	0.109989	0	36.9963	8.89911		52.3385	6.4588	41.2027		PHYLLIS 2		0.370493	0.273276	0.0228323	0.144953	0.085225	0.103221	0		0.524869	0.964892	0.511211	0.320243	1
	GRASS PLANTS	Grass	Tobacco	oriental	-	Nicotiana		40.1548	5.0086	2.21755	0.47792	0	36.3124	15.8287		49.2844	6.14735	44.5683		PHYLLIS 2		0.424085	0.312723	0.0055675	0.157375	0.0113172	0.051051	0.0378815		0.524935	0.937577	0.896584	0.192923	0.769476
	GRASS PLANTS	Other	Unidentified	typical average	Straw	-		47.6908	5.92369	0.702811	0.150602	0	41.0141	4.51807		50.3979	6.25995	43.3422		PHYLLIS 2		0.402042	0.29614	0.0102818	0.161352	0.0323448	0.0713326	0.0265065		0.525212	0.946548	0.755058	0.238351	0.853108
	GRASS PLANTS	Grass	Bermuda Grass	-	-	Poaceae		44.2913	5.51181	1.08268	0.393701	0.984252	39.1732	8.56299		49.7788	6.19469	44.0265		IEABCC		0.413758	0.303991	0.0072043	0.161285	0.0201663	0.0592784	0.0343172		0.525849	0.938882	0.832154	0.21012	0.802705
	GRASS PLANTS	Grass	Rape (Canola-colza)	-	Whole crop	Brassica		45.8774	5.70825	1.2685	0.528541	0.211416	41.1205	5.28541		49.4869	6.15735	44.3558		IEABCC		0.419645	0.30823	0.0060195	0.160046	0.0149681	0.0536656	0.0374259		0.525919	0.936032	0.869199	0.197599	0.779938
	GRASS PLANTS	Grass	Miscanthus	Atzenbrugg Austria	-	Miscanthus		47.5	5.1	0.6	0.05	0.33	43.62	2.8		49.366	5.30035	45.3336		BIOBIB		0.425615	0.310884	0.0815329	0.0846493	0.000439	0.0469813	0.0498979		0.527303	0.999412	0.992128	0.781109	0.551928
	GRASS PLANTS	Grass	Triticale	Winter	Straw	Poaceae Triticeae		47	5.3	0.3	0.1	0.3	42.7	4.3		49.4737	5.57895	44.9474		IEABCC		0.419593	0.30628	0.0054859	0.162092	0.0152275	0.0513366	0.0399854		0.52747	0.930603	0.868646	0.190926	0.77074
	GRASS PLANTS	Grass	Hemp (canhamo)	-	Seed	Cannabis sativa		47.8628	5.92837	0.658707	0.0678081	0	42.3316	3.15063		49.7934	6.16749	44.0391		PHYLLIS 2		0.413161	0.301339	0.0066116	0.163791	0.0210815	0.0570426	0.036973		0.527673	0.932743	0.828015	0.203422	0.79399
	WASTE MATERIALS	Food industry waste	orange		peel and seeds			46.4	5.7	1.52	0.05	0	41.78	4.55		49.4248	6.07158	44.5036		PHYLLIS 2		0.413042	0.300205	0.0635394	0.117047	0.0005994	0.0365054	0.0690614		0.528541	0.999196	0.99211	0.781649	0.551696
	GRASS PLANTS	Grass	Rye	-	Straw	Secale cereale		47.57	5.89	0.42	0.09	0.23	42.4	3.4		49.6245	6.14438	44.2312		BIOBIB		0.416184	0.302204	0.0056429	0.164558	0.0184254	0.0525252	0.040461		0.528776	0.927515	0.847063	0.192267	0.775725
	WASTE MATERIALS	Other waste	Greenwaste	-				47.4268	5.65086	0.302725	0.100908	0	43.5923	2.92634		49.0605	5.84551	45.0939		IEABCC		0.427685	0.310174	0.0037352	0.161429	0.0090334	0.0413681	0.0465749		0.529082	0.92147	0.917751	0.167616	0.731227
	GRASS PLANTS	Grass	Barley	-	Straw	Hordeum		45.112	5.60081	0.712831	0.203666	0.305499	42.4644	5.60081		48.4153	6.01093	45.5738		IEABCC		0.441396	0.319525	0.0020191	0.155783	0.000337	0.0280569	0.0528828		0.529544	0.914227	0.997644	0.139239	0.680217
	GRASS PLANTS	Grass	Miscanthus	Germany	-	Miscanthus		48.6	6	0.3	0.08	0.14	42.58	2.3		50.0103	6.17411	43.8156		BIOBIB		0.408496	0.295638	0.0068136	0.166792	0.0262446	0.0584977	0.0375185		0.529603	0.9281	0.797253	0.20503	0.800675
	GRASS PLANTS	Grass	Miscanthus	Indos N3 - Gross-Ezerdorf Austria	-	Miscanthus		45.6	5.1	1.4	0.12	0.19	43.19	4.4		48.5675	5.43189	46.0006		BIOBIB		0.437986	0.316487	0.0022775	0.15799	0.0022955	0.030508	0.0524566		0.529992	0.914025	0.978041	0.143721	0.689284
	GRASS PLANTS	Grass	China Reed		-	-		48.2	5.4	0.3	0	0.1	43.6	2.4		49.5885	5.55556	44.856		IEABCC		0.416654	0.300738	0.0050667	0.166204	0.0182223	0.0498175	0.0432979		0.530269	0.922065	0.849736	0.184789	0.764941
	GRASS PLANTS	Vegetables	Melon plant	-	-	Cucurbitaceae		35.5	4.37	4.62	0.17	0	30.96	24.38		50.12	6.1697	43.7103		PHYLLIS 2		0.406218	0.292853	0.0069113	0.168081	0.0289961	0.0591924	0.0377482		0.530568	0.925778	0.781872	0.205834	0.804017
	GRASS PLANTS	Vegetables	Watermelon plant	-	-	Cucurbitaceae Citrullus lanatus		37.64	4.62	3.6	0.15	0	33.41	20.58		49.7423	6.10546	44.1522		PHYLLIS 2		0.413493	0.297932	0.0054668	0.16736	0.0213018	0.0521144	0.0423323		0.530707	0.921941	0.829523	0.189514	0.774434
	GRASS PLANTS	Grass	Mint	-	Straw	Mentheae		45.4153	5.54384	2.48067	0.25108	0	35.4826	10.8266		52.5386	6.41338	41.048		PHYLLIS 2		0.367771	0.264714	0.0196295	0.147558	0.099819	0.0972866	0.0032214		0.530964	0.945849	0.476393	0.304776	0.985768
	GRASS PLANTS	Grass	Switchgrass	-	-	Panicum virgatum		47.3526	5.79421	0.799201	0.0999001	0.0999001	38.8611	6.99301		51.4658	6.2975	42.2367		IEABCC		0.382964	0.27546	0.0129305	0.163132	0.063873	0.0810497	0.0205909		0.531136	0.935745	0.611561	0.259463	0.903215
	GRASS PLANTS	Grass	Rice	-	Straw	Oryza sativa		39.65	4.88	0.92	0.12	0.5	35.77	18.16		49.3773	6.07721	44.5455		BIOBIB		0.420531	0.301555	0.0039792	0.166966	0.0149875	0.0437399	0.0482417		0.531899	0.914641	0.873614	0.169713	0.740526
	WOOD PLANTS	Hardwood	Ailanthus	-	Untreated wood	Ailanthus		50.7692	6.35897	0.307692	0	0	42.0513	0.512821		51.1892	6.41158	42.3992		PHYLLIS 2		0.387202	0.277385	0.0110027	0.166457	0.0566014	0.0752891	0.0260634		0.532142	0.929875	0.644596	0.244125	0.877111
	GRASS PLANTS	Grass	Rye	-	-	Secale		47.9	5.9	0.7	0.1	0.1	42.5	2.8		49.7404	6.12669	44.1329		IEABCC		0.413131	0.295602	0.0049668	0.169302	0.0219552	0.0498327	0.0452099		0.532443	0.916012	0.826782	0.182743	0.765416
	GRASS PLANTS	Grass	Sorghum	Sweet Sorghum Italy	-	Sorghum saccharatum		47.3	5.8	0.4	0.09	0.3	41.37	4.74		50.0688	6.13952	43.7917		BIOBIB		0.406736	0.290687	0.0060096	0.170403	0.0288934	0.055431	0.0418398		0.532734	0.91794	0.784751	0.195312	0.788971
	GRASS PLANTS	Grass	SugarCane	-	Bagasse	Saccharum spp		46.7205	5.75177	0.403633	0.201816	0.504541	43.0878	3.32997		48.8912	6.01901	45.0898		IEABCC		0.43043	0.30754	0.0025096	0.164335	0.0073325	0.0332345	0.0546194		0.532799	0.907272	0.933297	0.14606	0.699007
	GRASS PLANTS	Grass	Rape (Canola-colza)	-	-	Brassica napus		48.1	5.9	0.8	0.21	0.1	42.03	2.86		50.0885	6.14391	43.7676		BIOBIB		0.406326	0.290189	0.006026	0.170609	0.0294059	0.0555564	0.0418869		0.53291	0.917518	0.781955	0.195458	0.789578
	GRASS PLANTS	Grass	Rape (Canola-colza)	-	Stalk	Brassica		48.1	5.9	0.08	0.21	0	42.85	2.86		49.6644	6.09189	44.2437		PHYLLIS 2		0.414392	0.295286	0.0044532	0.170099	0.0208619	0.0471085	0.0477992		0.533468	0.911847	0.834615	0.17563	0.754393
	GRASS PLANTS	Grass	Wheat	-	Straw	Triticum		43.3602	5.33199	0.603622	0.201207	0.804829	40.0402	9.65795		48.8662	6.00907	45.1247		IEABCC		0.430702	0.306879	0.002338	0.164886	0.0071857	0.03195	0.0560596		0.533492	0.90473	0.934722	0.142528	0.69389
	WASTE MATERIALS	Wood waste	Lacquered	-				-	-	-	-	-	-	-		49.6682	6.11301	44.2188		BIOBIB		0.411472	0.292502	0.073948	0.112798	0.0005901	0.0418843	0.0668051		0.534066	0.999231	0.991997	0.784066	0.550793
	WOOD PLANTS	Hardwood	Pistachio	-	-	Pistacia vera		48.79	5.91	0.56	0.01	0.04	43.41	1.28		49.7299	6.02385	44.2463		BIOBIB		0.412989	0.29355	0.00449	0.170978	0.0223679	0.04749	0.0481353		0.534092	0.910294	0.825438	0.175899	0.756094
	GRASS PLANTS	Grass	SugarCane	-	Trash	Saccharum spp		44.2177	5.40216	0.60024	0.060024	0	38.7155	11.0044		50.0566	6.11552	43.8279		PHYLLIS 2		0.406699	0.28873	0.0054523	0.17206	0.0292883	0.0529778	0.0447929		0.534392	0.912147	0.784024	0.188224	0.77922
	GRASS PLANTS	Grass	Miscanthus	Low K	-	Miscanthus		48.7562	5.97015	0.597015	0	0	43.5821	1.09453		49.5951	6.07287	44.332		PHYLLIS 2		0.415425	0.294575	0.0039549	0.171047	0.020029	0.0443165	0.0506528		0.534688	0.907109	0.840874	0.168177	0.743126
	WOOD PLANTS	Hardwood	American Ash (White Ash)		Untreated Wood	Fraxinus americana		49.7497	6.90691	0	0	0	43.043	0.3003		49.8996	6.92771	43.1727		PHYLLIS 2		0.409577	0.290396	0.0048533	0.172093	0.0260908	0.0497695	0.0472211		0.534715	0.909671	0.803039	0.180527	0.765768
	GRASS PLANTS	Grass	Rice	-	Straw	Oryza		40.02	4.89022	0.798403	0.0998004	0.399202	35.4291	18.3633		49.8137	6.08696	44.0994		IEABCC		0.411293	0.291521	0.0045513	0.171929	0.0242493	0.0480342	0.0484232		0.534794	0.908606	0.814252	0.176484	0.758525
	WOOD PLANTS	Hardwood	Manzanita	-	Untreated wood	-		48.2717	5.95131	0.170324	0.0200381	0	44.7651	0.821561		48.7652	6.01215	45.2227		PHYLLIS 2		0.432466	0.306004	0.0018393	0.165669	0.0060648	0.0277666	0.0601905		0.535219	0.897947	0.944593	0.13164	0.677324
	GRASS PLANTS	Grass	Wheat	-	Stems	Triticum		46.6104	5.69449	0.69298	0.100432	0	40.9862	5.91544		49.9623	6.10399	43.9337		PHYLLIS 2		0.408237	0.288845	0.0049175	0.172722	0.0276843	0.0502625	0.0473317		0.535232	0.90848	0.794034	0.181209	0.768018
	GRASS PLANTS	Grass	Flax	-	Shive	Linum usitatissimum		50.3	6.1	0.6	0.07	0.04	41.08	1.81		51.6003	6.25769	42.142		BIOBIB		0.38042	0.268615	0.0113079	0.165766	0.0717976	0.0768516	0.0252425		0.535739	0.921222	0.587268	0.247122	0.889569
	WOOD PLANTS	Hardwood	Robinia	Black locust	Untreated wood	Robinia pseudoacacia		50.8571	5.72431	0.571429	0.0100251	0	42.0351	0.802005		51.5706	5.80462	42.6248		PHYLLIS 2		0.380727	0.268188	0.0109057	0.166504	0.0714681	0.0756583	0.0265491		0.536335	0.918968	0.589456	0.243766	0.884587
	WOOD PLANTS	Hardwood	Bamboo	-	Chips (wood)	Bambuseae		51.5	5.1	0.4	0	0.1	42	0.9		52.2312	5.17241	42.5963		IEABCC		0.371581	0.261125	0.0139452	0.157539	0.0947099	0.0845458	0.016555		0.536926	0.922748	0.506031	0.268655	0.931257
	GRASS PLANTS	Grass	Corn	-	Stover	Zea mays		-	-	-	-	-	-	-		50.7581	6.15932	43.0826		NREL		0.39361	0.276466	0.0071241	0.173387	0.0478203	0.0616329	0.0399595		0.537051	0.909307	0.691014	0.207126	0.818954
	GRASS PLANTS	Grass	Oat	-	Straw	Avena		46.0437	5.61037	0.483653	0.0773844	0	42.0778	5.7071		49.1228	5.98555	44.8916		PHYLLIS 2		0.424603	0.297791	0.0022016	0.170663	0.012133	0.0317398	0.0608679		0.537422	0.893525	0.897025	0.137584	0.692468
	GRASS PLANTS	Grass	Switchgrass	Summer	-	Panicum virgatum		47.5105	5.79884	0.359928	0.04999	0	43.5913	2.68946		49.0301	5.98432	44.9856		PHYLLIS 2		0.426465	0.299003	0.0020019	0.170025	0.010645	0.0299096	0.0619503		0.5375	0.89246	0.908238	0.133541	0.685224
	GRASS PLANTS	Grass	Miscanthus	Fresh	-	Miscanthus		46.8997	5.69952	0.551873	0.0856355	0	42.0185	4.74478		49.5676	6.02373	44.4087		PHYLLIS 2		0.415204	0.289629	0.0029739	0.1745	0.0208023	0.0384741	0.0584171		0.538765	0.892921	0.838216	0.15103	0.719668
	GRASS PLANTS	Grass	Miscanthus	Sinensis Silberfeder	-	Miscanthus sinensis		47.3184	5.75345	0.330198	0.060036	0	43.4861	3.05183		49.0052	5.95855	45.0363		PHYLLIS 2		0.426669	0.297263	0.001712	0.171086	0.0106135	0.027421	0.0652355		0.53907	0.88688	0.908897	0.126386	0.67518
	GRASS PLANTS	Grass	Switchgrass	Dakota	-	Panicum virgatum		47.4642	5.75173	0.740222	0.080024	0	42.3527	3.61108		49.6651	6.01842	44.3165		PHYLLIS 2		0.413163	0.28718	0.0030247	0.17558	0.0230142	0.039077	0.05896		0.539651	0.890737	0.824845	0.151521	0.722284
	GRASS PLANTS	Grass	Wheat	Thunderbird	Straw	Triticum aestivum		-	-	-	-	-	-	-		49.926	5.98475	44.0892		NREL		0.394226	0.273713	0.0594235	0.14968	0.0007843	0.0331581	0.0890155		0.539928	0.99899	0.991885	0.786627	0.549799
	GRASS PLANTS	Grass	SugarCane	-	Trash	Saccharum spp		44.2724	5.67595	0.619195	0.103199	0	39.4221	9.90712		49.5381	6.35104	44.1109		IEABCC		0.415347	0.287012	0.0024595	0.176077	0.0209544	0.0349062	0.063244		0.541106	0.884661	0.838298	0.140654	0.705229
	GRASS PLANTS	Grass	Miscanthus	Sinensis	-	Miscanthus sinensis		47.6982	5.7546	0.45036	0.05004	0	42.6841	3.36269		49.6148	5.98584	44.3993		PHYLLIS 2		0.413851	0.285271	0.002501	0.176803	0.0225694	0.0354051	0.0635997		0.541721	0.883184	0.82851	0.141166	0.707356
	GRASS PLANTS	Grass	Miscanthus	High K	-	Miscanthus		49.2323	5.93654	0.307062	0.102354	0	42.8864	1.53531		50.2088	6.05428	43.737		PHYLLIS 2		0.402487	0.277376	0.0039586	0.178081	0.0360384	0.0460561	0.0560034		0.541776	0.888307	0.75284	0.165865	0.752642
	GRASS PLANTS	Grass	Bamboo	-	-	Bambuseae		46.7541	5.65688	0.905101	0.103709	0	43.426	3.15421		48.785	5.90261	45.3123		PHYLLIS 2		0.430597	0.296075	0.0009493	0.171404	0.0078681	0.0190906	0.0740162		0.54234	0.87381	0.930831	0.104702	0.641858
	GRASS PLANTS	Grass	Corn	-	Whole crop	Zea mays		44.62	5.37	0.41	0.05	1.48	39.57	8.5		49.8213	5.99598	44.1827		BIOBIB		0.409599	0.281235	0.0027868	0.178157	0.0273634	0.0379668	0.0628914		0.542695	0.881716	0.800518	0.146086	0.718246
	GRASS PLANTS	Grass	Canary grass	reed	Leaves	Phalaris		44.0044	5.30053	0.50005	0.090009	0	39.904	10.201		49.3274	5.9417	44.7309		PHYLLIS 2		0.419088	0.286696	0.001647	0.176482	0.0175869	0.0278112	0.0706893		0.543605	0.874271	0.860808	0.122191	0.676302
	GRASS PLANTS	Grass	Corn	-	Stover	Zea mays		46.1678	5.54726	0.702778	0.0562223	0	41.2578	6.26812		49.6573	5.96654	44.3761		PHYLLIS 2		0.412567	0.281895	0.0022153	0.178312	0.0242145	0.0334308	0.0673656		0.543904	0.876128	0.81939	0.134522	0.699437
	WOOD PLANTS	Unidentified	Unidentified	Untreated Wood	Sawdust	-		49.2848	5.93178	0.40012	0.020006	0	43.303	1.06032		50.0254	6.02092	43.9537		PHYLLIS 2		0.405313	0.276233	0.0029082	0.179617	0.0328286	0.0393362	0.0637639		0.544537	0.877284	0.771155	0.147621	0.724627
	WASTE MATERIALS	Food industry waste	orange		skin, air dried			47.7648	6.15062	0.860086	0	0	41.3241	3.90039		50.1523	6.45805	43.3897		PHYLLIS 2		0.43272	0.294493	0.1363	0.0383695	0.0002156	0.0750147	0.0228874		0.544889	0.999743	0.99176	0.788804	0.549085
	GRASS PLANTS	Grass	Sunflower	-	Whole crop	Helianthus		44.3205	5.27383	1.5213	0.20284	0.709939	35.3955	12.5761		52.148	6.20525	41.6468		IEABCC		0.372184	0.25327	0.0096288	0.163029	0.0986995	0.0724109	0.0307781		0.544914	0.894719	0.504154	0.233966	0.883296
	GRASS PLANTS	Grass	Alfalfa	-	Straw	Medicago		45.4274	5.666	1.68986	0.198807	0.596421	39.4632	6.95825		50.1647	6.25686	43.5785		IEABCC		0.418033	0.284239	0.112249	0.077219	0.0004265	0.0617585	0.0460742		0.545114	0.999482	0.991764	0.7889	0.549013
	WASTE MATERIALS	Grass plant waste	Sugarcane	Screened	Bagasse			49.0098	5.87117	0.10002	0.060012	0	43.2787	1.68034		49.9287	5.98125	44.0901		PHYLLIS 2		0.407032	0.276445	0.0025256	0.179906	0.0308076	0.0364658	0.0668169		0.545396	0.873466	0.782396	0.140119	0.71257
	WASTE MATERIALS	Food industry waste	Pineapple					47.3047	6.0306	1.13011	0.210021	0	40.9341	4.39044		50.1804	6.3972	43.4224		PHYLLIS 2		0.426644	0.289567	0.127847	0.05348	0.0002991	0.0702452	0.0319172		0.545566	0.999642	0.99175	0.789098	0.54896
	GRASS PLANTS	Grass	SugarCane	-	Bagasse	Saccharum spp		47.0878	5.62851	0.313223	0.047458	0	41.801	5.12205		49.8192	5.95501	44.2257		PHYLLIS 2		0.409075	0.27696	0.0021568	0.180012	0.0284569	0.0334195	0.0699197		0.546175	0.869787	0.79565	0.132306	0.699789
	GRASS PLANTS	Grass	Hay	-	Grass	-		45.2122	5.72557	1.7769	0.29615	1.1846	39.388	6.41658		50.0546	6.3388	43.6066		IEABCC		0.404613	0.273638	0.0025902	0.180577	0.0340247	0.0372352	0.0673219		0.546449	0.870933	0.765617	0.140996	0.716216
	GRASS PLANTS	Grass	Tobacco	Bright	-	Nicotiana		43.0784	5.76764	2.72239	0.602068	0	37.4067	10.4228		49.9444	6.6869	43.3687		PHYLLIS 2		0.406437	0.274026	0.0022408	0.180767	0.0318041	0.0344106	0.0703147		0.547212	0.867397	0.777639	0.133659	0.704276
	WOOD PLANTS	Softwood	Birch	-	Log	Betula		-	-	-	-	-	-	-		48.5	5.9	45.6		BIOBIB		0.435971	0.293468	0.0002183	0.170829	0.0044824	0.0067651	0.0882652		0.547609	0.853252	0.959044	0.072112	0.592464
	GRASS PLANTS	Grass	Canary grass	reed	Stems	Phalaris		46.0691	5.50826	0.2003	0.0500751	0	42.8643	5.30796		48.7805	5.83245	45.3871		PHYLLIS 2		0.429739	0.288433	0.0004156	0.174142	0.0089698	0.0113665	0.0869338		0.548329	0.853271	0.922634	0.0809297	0.60999
	WOOD PLANTS	Hardwood	Teak	-	Untreated wood	Tectona grandis		51.6	6	0.26	0	0	40.04	2.1		52.8472	6.14502	41.0078		PHYLLIS 2		0.364149	0.244298	0.0110774	0.148586	0.131681	0.0770385	0.0231698		0.548442	0.888913	0.409745	0.249487	0.918531
	GRASS PLANTS	Grass	Corn	-	Whole crop	Zea mays		45.481	5.24781	0.971817	0.0971817	1.45773	38.484	8.26045		50.9804	5.88235	43.1373		IEABCC		0.38817	0.259408	0.0041884	0.178995	0.060919	0.0490101	0.0593099		0.549399	0.869092	0.643804	0.168107	0.771529
	GRASS PLANTS	Grass	Rice	-	Hull	Oryza		39.3696	4.69105	0.472307	0.0880573	0	35.9434	19.4356		49.2095	5.86352	44.927		PHYLLIS 2		0.420491	0.280898	0.0007826	0.178261	0.0168531	0.0181213	0.0845937		0.549497	0.853089	0.866621	0.0942294	0.636583
	GRASS PLANTS	Grass	Miscanthus	presto N3 - Gross-Ezerdorf Austria	-	Miscanthus		45.3	5.4	1.7	0.14	0.38	42.48	4.6		48.6156	5.79524	45.5892		BIOBIB		0.433119	0.289286	0.0002041	0.17276	0.0065852	0.0066384	0.0914068		0.549537	0.847686	0.941494	0.0693716	0.591192
	GRASS PLANTS	Grass	Rape (Canola-colza)	-	Cake	Brassica		53.5321	7.30438	4.90294	0.540324	0	28.317	5.40324		60.0449	8.19304	31.7621		PHYLLIS 2		0.270019	0.180013	0.124006	0.0019032	0.0186358	0.405423	0		0.55	0.8	0.8	0.44	1
	WOOD PLANTS	Unidentified	Unidentified	Wood	-	-		47.7522	5.79421	1.3986	0.0999001	0.0999001	38.961	5.89411		51.6199	6.2635	42.1166		IEABCC		0.310895	0.207264	0.0019273	0.212844	0.032817	0	0.234252		0.55	0.8	0.8	1	0.45
	GRASS PLANTS	Grass	Oat	-	Straw	Avena sativa		46.32	4.9	0.69	0.11	1.5	38.66	7.82		51.5354	5.45171	43.0129		BIOBIB		0.313483	0.208989	0.0023232	0.239339	0.0369252	0	0.19894		0.55	0.8	0.8	1	0.52
	GRASS PLANTS	Grass	Oat	-	Straw	Avena		46.3	4.9	0.7	0.1	1.5	38.7	7.8		51.5017	5.4505	43.0478		IEABCC		0.31493	0.209953	0.0004411	0.239213	0.0366274	0	0.198835		0.55	0.8	0.8	1	0.52
	GRASS PLANTS	Grass	Rape (Canola-colza)	-	Oil filter cake	Brassica napus		50.2	6.86	5.05	0.77	0.03	30.79	6.3		57.1429	7.80876	35.0484		BIOBIB		0.334805	0.223203	0.0970736	5.6e-06	0.0143615	0.330551	0		0.55	0.8	0.8	0.43	1
	GRASS PLANTS	Other	Chaparral	-	-	Yucca whipplei		46.9	5.08	0.54	0.02	0.03	40.17	7.26		50.8953	5.51275	43.592		BIOBIB		0.341021	0.227347	0.0022477	0.212612	0.0328289	0	0.183944		0.55	0.8	0.8	1	0.51
	GRASS PLANTS	Grass	Mustard	-	Shell	Brassicaceae		46.2	6.21	0	0	0	32.19	15.4		54.6099	7.34043	38.0496		PHYLLIS 2		0.375799	0.250533	0.117317	0.0019169	0.0176483	0.236786	0		0.55	0.8	0.8	0.56	1
	GRASS PLANTS	Grass	Wheat	-	Grain	Triticum aestivum		45.8	5.05	0.34	0.06	0.43	41.05	7.27		49.8368	5.4951	44.6681		BIOBIB		0.389037	0.259358	0.000934	0.0909465	0.0140388	0	0.245685		0.55	0.8	0.8	1	0.25
	WOOD PLANTS	Hardwood	Almond	-	Shell	Prunus		48.3121	5.99756	0.682649	0.0292564	0	42.7338	2.24461		49.7839	6.18028	44.0358		PHYLLIS 2		0.390219	0.260146	1.44e-05	0.117279	0.0179275	0	0.214414		0.55	0.8	0.8	1	0.33
	GRASS PLANTS	Vegetables	Aubergine (Eggplant)	-	-	Solanum		42.09	4.56	2.18	0.1	0	37.95	13.12		49.7518	5.39007	44.8582		PHYLLIS 2		0.395156	0.263437	0.0003281	0.0037766	0.0006258	0	0.336676		0.55	0.8	0.8	1	0.01
	GRASS PLANTS	Grass	Wheat	Winter	Straw	Triticum		46.7131	5.27888	0.398406	0.0996016	0.498008	42.2311	4.78088		49.5772	5.60254	44.8203		IEABCC		0.398207	0.265472	0.000255	0.13723	0.0210125	0	0.177823		0.55	0.8	0.8	1	0.41
	GRASS PLANTS	Grass	Barley	Finnish	Straw	Hordeum vulgare		46.2	5.7	0.6	0.08	0.27	41.27	5.88		49.5868	6.11785	44.2954		BIOBIB		0.399116	0.266077	0.0015577	0.105482	0.0163526	0	0.211415		0.55	0.8	0.8	1	0.31
	GRASS PLANTS	Grass	Miscanthus	Ilz Austria	-	Miscanthus		47.9	5.5	0.2	0.03	0.04	43.33	3		49.5193	5.68593	44.7948		BIOBIB		0.401695	0.267797	0.0009091	0.107445	0.0165568	0	0.205597		0.55	0.8	0.8	1	0.32
	GRASS PLANTS	Grass	Ryegrass	-	Straw	Lolium		46.6533	5.79421	0.999001	0.1998	0.0999001	41.8581	4.3956		49.4703	6.14407	44.3856		IEABCC		0.403711	0.269141	0.000801	0.109433	0.0168447	0	0.20007		0.55	0.8	0.8	1	0.33
	GRASS PLANTS	Vegetables	Topinambur (Jerusalem artichoke)	-	Whole crop	Helianthus tuberosus		44.955	5.09491	0.799201	0	0.3996	41.3586	7.39261		49.1803	5.57377	45.2459		IEABCC		0.417046	0.278031	0.000988	0.0699101	0.0108315	0	0.223194		0.55	0.8	0.8	1	0.22
	GRASS PLANTS	Vegetables	Cucumber plant	-	-	Cucumis		33.81	3.87	3	0.24	0	31.12	27.96		49.1424	5.625	45.2326		PHYLLIS 2		0.417416	0.278277	0.0003596	0.110359	0.0169209	0	0.176668		0.55	0.8	0.8	1	0.36
	GRASS PLANTS	Grass	Amaranth	-	-	Amaranthus		41.14	4.75	1.81	0.26	0.56	38.9	12.58		48.5199	5.60208	45.8781		BIOBIB		0.446126	0.297417	0.0008223	0.0194806	0.0030991	0	0.233055		0.55	0.8	0.8	1	0.07
	GRASS PLANTS	Grass	Corn	-	Straw	Zea mays		45.6	5.4	0.3	0	0.2	43.2	5.3		48.4076	5.73248	45.8599		IEABCC		0.44833	0.298887	0.0013065	0.100371	0.0155343	0	0.135572		0.55	0.8	0.8	1	0.4
	GRASS PLANTS	Grass	Hemp (canhamo)	-	Whole crop	Cannabis sativa		44.5003	5.36414	0.853842	0.200904	0	43.0537	6.02712		47.8919	5.77297	46.3351		PHYLLIS 2		0.470749	0.313833	0.0004732	0.0740737	0.0113917	0	0.129479		0.55	0.8	0.8	1	0.34
	WOOD PLANTS	Hardwood	Almond	-	Shell	Prunus		46.2	5.8	0.7	0	0	44.5	2.8		47.8756	6.01036	46.114		IEABCC		0.471747	0.314498	0.0010457	0.0572038	0.0088979	0	0.146607		0.55	0.8	0.8	1	0.26
	GRASS PLANTS	Grass	Reed	(giant reed)	-	Arundo donax		45.4633	5.50487	0.452323	0.105863	0	44.9628	3.51087		47.3917	5.73836	46.87		PHYLLIS 2		0.492838	0.328558	0.0003402	0.033913	0.0052337	0	0.139117		0.55	0.8	0.8	1	0.18
	GRASS PLANTS	Grass	Oat	-	screenings	Avena		46.5371	6.37768	1.59442	0.149477	0	40.857	4.4843		49.6281	6.80128	43.5707		PHYLLIS 2		0.498782	0.332522	0.0315797	7.61e-05	0.0046834	0.132357	0		0.55	0.8	0.8	0.38	1
	GRASS PLANTS	Grass	Bamboo	-	Sawdust	Bambuseae		46.04	5.74	0.21	0.02	0	46.16	1.83		47.0084	5.86073	47.1309		PHYLLIS 2		0.508483	0.338989	0.0005503	0.0423409	0.0065529	0	0.103084		0.55	0.8	0.8	1	0.27
	GRASS PLANTS	Grass	Bean	-	Straw	Fabaceae		43.043	5.60561	0.800801	0	0.1001	44.9449	5.50551		45.9893	5.9893	48.0214		IEABCC		0.551537	0.367691	5.8e-06	0.0255818	0.0039109	0	0.0512731		0.55	0.8	0.8	1	0.31
	GRASS PLANTS	Garden Plants	Lupin	-	flowers	Lupinus		34.5968	3.78041	1.50814	0.180977	0	36.8993	23.0344		45.9597	5.02204	49.0183		PHYLLIS 2		0.553126	0.368751	9.56e-05	0.0148454	0.0022832	0	0.0608984		0.55	0.8	0.8	1	0.18
	GRASS PLANTS	Grass	Rice	-	Husk	Oryza		37.8789	5.18788	0.814424	0.203606	0	38.0336	17.8816		46.7062	6.39687	46.897		PHYLLIS 2		0.561839	0.374559	0.0085286	0.0001514	0.0012848	0.0536376	0		0.55	0.8	0.8	0.29	1
	GRASS PLANTS	Grass	Orchard	-	-	-		47.952	5.69431	0.599401	0.0999001	0	42.8571	2.7972		49.6894	5.90062	44.4099		IEABCC		0.410782	0.273594	0.0013555	0.181146	0.0269655	0.0260254	0.0801315		0.550236	0.854816	0.804988	0.11128	0.669204
	WOOD PLANTS	Hardwood	Oak	Swamp	Untreated Wood	Quercus		49.828	6.22974	0.12896	0	0	42.9931	0.820164		50.3055	6.28943	43.4051		PHYLLIS 2		0.399346	0.265832	0.0024187	0.182021	0.0419592	0.0366355	0.0717875		0.550371	0.859799	0.727297	0.136291	0.715215
	GRASS PLANTS	Grass	Amaranth	Mixed sample	-	Amaranthus		42.2	5	2.3	0.2	0.5	38.3	11.5		49.3567	5.84795	44.7953		IEABCC		0.417168	0.27622	0.0007524	0.179835	0.0202657	0.0180836	0.0876746		0.551689	0.84689	0.844887	0.0917061	0.636218
	GRASS PLANTS	Grass	Rye	-	Straw	Secale		47.2527	5.59441	0.3996	0.0999001	0.0999001	42.7572	3.7962		49.4253	5.85162	44.7231		IEABCC		0.415561	0.274482	0.0007841	0.18042	0.0219623	0.0187085	0.088082		0.552295	0.845482	0.834489	0.0924519	0.638758
	GRASS PLANTS	Grass	Barley	winter barley	Straw	Hordeum vulgare		46.79	5.53	0.41	0.06	0.41	41.94	4.86		49.6393	5.86675	44.494		BIOBIB		0.411394	0.271613	0.0010345	0.181494	0.0265001	0.0224024	0.0855619		0.552401	0.846979	0.807867	0.100758	0.654157
	GRASS PLANTS	Grass	Banagrass	-	-	Poaceae		47.3059	5.58287	0.545838	0.0766088	0	41.9337	4.55503		49.8889	5.8877	44.2234		PHYLLIS 2		0.406528	0.267905	0.0013316	0.1824	0.0323959	0.0262926	0.0831461		0.552859	0.847631	0.775652	0.109356	0.670772
	GRASS PLANTS	Grass	Wheat	-	Whole crop	Triticum aestivum		46.71	5.5	1.23	0.09	0.33	41.21	4.93		50	5.88739	44.1126		BIOBIB		0.404318	0.26541	0.0013755	0.182777	0.0353844	0.0270116	0.0837232		0.553824	0.84531	0.760272	0.11016	0.674114
	GRASS PLANTS	Grass	Corn	-	Cob	Zea mays		47.79	5.64	0.44	0.01	0.21	44.71	1.2		48.6957	5.74689	45.5574		BIOBIB		0.43059	0.281793	4.45e-05	0.174511	0.0088488	0.0019665	0.102247		0.55458	0.831177	0.923456	0.05303	0.571079
	WOOD PLANTS	Hardwood	Almond	-	Hull	Prunus		47.12	5.97	1.19	0.06	0.04	40.07	5.55		50.5796	6.40833	43.012		BIOBIB		0.401263	0.262596	0.108847	0.10514	0.0005909	0.0584162	0.063147		0.554583	0.999303	0.991577	0.793039	0.547435
	WASTE MATERIALS	Food industry waste	Sugarcane		Fiber			44.5579	5.18674	0.510664	0.160208	0	33.884	15.7004		53.2807	6.20211	40.5172		PHYLLIS 2		0.360336	0.234761	0.009608	0.136268	0.15964	0.072397	0.02699		0.555687	0.867981	0.344137	0.239088	0.91356
	WASTE MATERIALS	Food industry waste	Wheat		Dust			41.9761	5.17346	3.08379	0.192737	0	35.6969	13.8771		50.6673	6.24464	43.088		PHYLLIS 2		0.400989	0.260269	0.113851	0.102123	0.0005785	0.0607703	0.0614191		0.556612	0.999325	0.991535	0.793927	0.547105
	WOOD PLANTS	Hardwood	Cherry tree	-	Untreated Wood	Prunus		50.0256	5.86953	0.308923	0.0199305	0	42.4121	1.36391		50.887	5.9706	43.1424		PHYLLIS 2		0.388331	0.250477	0.0022225	0.181027	0.062155	0.0363917	0.0793959		0.558159	0.838384	0.64131	0.130208	0.719193
	GRASS PLANTS	Grass	Flax	-	Straw	Linum usitatissimum		48.24	5.62	0.88	0.12	0.23	41.23	3.68		50.7309	5.91019	43.3589		BIOBIB		0.390855	0.251766	0.0018932	0.181938	0.0572816	0.0334152	0.0828515		0.558492	0.835832	0.660941	0.122267	0.705313
	WASTE MATERIALS	Other waste	Domestic Organic Waste	Municipal Collection				48.1	5.91	0.69	0.04	0.02	40.74	4.5		50.7652	6.23747	42.9974		BIOBIB		0.398689	0.256541	0.115794	0.104179	0.0005937	0.061455	0.0627479		0.558752	0.999313	0.991492	0.794863	0.546752
	WOOD PLANTS	Unidentified	Unidentified	Wood	Briquette	-		49	6	0	0.1	0	44.4	0.5		49.2958	6.03622	44.668		BIOBIB		0.417124	0.267218	0.0001673	0.179949	0.0210445	0.0068941	0.107604		0.559843	0.818516	0.83957	0.0574151	0.589307
	WASTE MATERIALS	Wood waste	Residues containing adhesives	-				49.2	6.12	2.21	0.02	0.1	41.45	0.9		50.8422	6.32427	42.8335		BIOBIB		0.404258	0.258223	0.130196	0.0861321	0.0004976	0.068755	0.0519388		0.56056	0.999435	0.991451	0.795654	0.546472
	WASTE MATERIALS	Other waste	Waste materials	-				48.3	5.7	0.7	0	0	40.8	4.5		50.9494	6.01266	43.038		BIOBIB		0.373065	0.23602	0.0839203	0.163337	0.000918	0.0440599	0.0986792		0.562924	0.998919	0.991419	0.796684	0.546015
	GRASS PLANTS	Grass	Sugarcane	Gramineae Saccharum var, 65-7052	Bagasse	Saccharum spp		-	-	-	-	-	-	-		50.9783	6.03808	42.9836		NREL		0.386177	0.243953	0.0016139	0.180063	0.0671447	0.0313907	0.0896573		0.56329	0.821663	0.621873	0.113938	0.699382
	WOOD PLANTS	Hardwood	Mixed	oak + birch + maple	Untreated wood	-		49.0919	5.93332	0.332893	0.0489548	0	42.4928	2.10021		50.3414	6.08434	43.5743		PHYLLIS 2		0.396572	0.250057	0.0007657	0.182694	0.0477126	0.0205854	0.101613		0.563745	0.814485	0.701141	0.0857944	0.648786
	GRASS PLANTS	Grass	Knotgrass	-	-	Paspalum distichum		47.07	5.41	1.08	0.12	0.48	39.9	5.94		50.9526	5.85625	43.1912		BIOBIB		0.386426	0.242653	0.0013843	0.180027	0.0666955	0.0290994	0.0937148		0.564763	0.816367	0.623326	0.106947	0.689452
	GRASS PLANTS	Grass	Knotgrass	-	-	Poaceae		47.297	5.43609	1.08521	0.120579	0	40.0924	5.96865		50.9526	5.85625	43.1912		PHYLLIS 2		0.386426	0.242653	0.0013843	0.180027	0.0666955	0.0290994	0.0937148		0.564763	0.816367	0.623326	0.106947	0.689452
	WOOD PLANTS	Hardwood	Poplar	Cottonwood Eastern / Stoneville #66	-	Populus Deltoides		-	-	-	-	-	-	-		50.9858	6.00739	43.0068		NREL		0.385834	0.241929	0.0013885	0.179706	0.0679926	0.0292019	0.0939479		0.56512	0.815457	0.618365	0.107004	0.690248
	GRASS PLANTS	Grass	Sugarmillet	-	Whole crop	-		46.1	5.3	1	0.1	0.3	40.2	7		50.3275	5.78603	43.8865		IEABCC		0.396675	0.248437	0.0006106	0.18238	0.0476345	0.0182191	0.106044		0.565406	0.808636	0.701047	0.0784838	0.638635
	GRASS PLANTS	Grass	Sunflower	-	Residue	Helianthus anuus		57.56	6.48	1.65	0.13	0.1	30.85	3.23		60.6597	6.82896	32.5113		BIOBIB		0.235743	0.147445	0.0823224	0	0.351002	0.183487	0		0.565741	0.898982	0	0.506322	1
	WASTE MATERIALS	Food industry waste	Coffee		Husk			49.3605	6.09512	0.809353	0.069944	0	41.1671	2.498		51.0858	6.30817	42.606		PHYLLIS 2		0.397429	0.248342	0.133802	0.0935929	0.0005481	0.0696383	0.0566477		0.565967	0.999389	0.991343	0.798018	0.545578
	GRASS PLANTS	Grass	Knotgrass	-	-	Poaceae		47.1	5.4	1.1	0.1	0.5	39.9	5.9		50.974	5.84416	43.1818		IEABCC		0.385757	0.240361	0.0011962	0.179427	0.0682153	0.0271437	0.0978993		0.566668	0.810082	0.617155	0.100557	0.681459
	GRASS PLANTS	Grass	Wheat	Dutch	Straw Pellets	Triticum		43.4789	4.89149	0.651603	0.169595	0	39.4265	11.382		49.5222	5.57137	44.9065		PHYLLIS 2		0.411571	0.256125	3.69e-05	0.179885	0.0275044	0.0023502	0.122527		0.566975	0.796153	0.799974	0.0389402	0.569346
	GRASS PLANTS	Grass	Sorghum	Sweet Sorghum	-	Sorghum saccharatum		45.81	5.26	0.97	0.06	0.31	41.02	6.57		49.7448	5.7118	44.5434		BIOBIB		0.40712	0.253161	0.0001189	0.180972	0.0328177	0.0061351	0.119675		0.567163	0.797503	0.771336	0.0475491	0.585458
	GRASS PLANTS	Grass	Miscanthus	Two Annual	-	Miscanthus		47.67	5.46	0.49	0.06	0.25	41.38	4.69		50.4391	5.77717	43.7837		BIOBIB		0.394403	0.245184	0.0005767	0.181735	0.0514924	0.0179008	0.108708		0.567233	0.803416	0.683671	0.076135	0.637882
	GRASS PLANTS	Grass	Sunflower	-	Straw	Helianthus anuus		44.62	5.1	1.1	0.11	0.72	37.15	11.2		51.3641	5.87084	42.7651		BIOBIB		0.37996	0.235956	0.0016116	0.175682	0.0821237	0.0319637	0.0927024		0.567491	0.810679	0.567368	0.11333	0.706419
	GRASS PLANTS	Grass	Verge grass	-	Pellets	Poaceae		41.3942	4.7118	2.04897	0.149318	0	33.9449	17.7509		51.7098	5.88601	42.4041		PHYLLIS 2		0.375075	0.23166	0.0019475	0.170735	0.0961739	0.0353745	0.0890348		0.568826	0.809221	0.521171	0.122659	0.726072
	GRASS PLANTS	Grass	Rape (Canola-colza)	Summer	Whole crop	Brassica		44.7	5.1	1.4	0.3	1	37.8	9.7		51.0274	5.82192	43.1507		IEABCC		0.38458	0.237423	0.0010219	0.178378	0.0708579	0.0252162	0.102523		0.568937	0.802822	0.606657	0.0939898	0.673846
	GRASS PLANTS	Grass	Energy Grass	-	-	Poaceae		45.7	5.2	1.6	0.2	0.3	37.1	9.9		51.9318	5.90909	42.1591		IEABCC		0.372333	0.229784	0.0022714	0.167116	0.105323	0.0381906	0.0849819		0.56902	0.810506	0.493151	0.131038	0.741775
	GRASS PLANTS	Other	Lucerne	-	Whole crop	-		45.8	5.2	2.7	0.2	0.4	37.2	8.5		51.9274	5.89569	42.1769		IEABCC		0.372279	0.228934	0.0021251	0.166922	0.105491	0.0370384	0.087212		0.569893	0.807477	0.492425	0.127415	0.736842
	GRASS PLANTS	Grass	Corn	-	Cob	Zea mays		48.2482	5.50551	0.800801	0	0.3003	42.4424	2.7027		50.1561	5.7232	44.1207		IEABCC		0.398939	0.245236	0.0002169	0.180998	0.0442292	0.0099101	0.120471		0.569986	0.791539	0.714598	0.0537749	0.60232
	WASTE MATERIALS	Wood waste	Residues containing particle boards	-				49.8	6.05	1.04	0.15	0.03	39.43	3.5		52.267	6.34971	41.3833		BIOBIB		0.36835	0.226173	0.0026461	0.160109	0.120808	0.0411762	0.0807377		0.570266	0.809259	0.448352	0.140295	0.761124
	GRASS PLANTS	Grass	Miscanthus	-	Sillage	Miscanthus		47.4606	5.81503	0.412618	0.0767661	0	42.1638	4.07122		49.7285	6.0929	44.1786		PHYLLIS 2		0.406939	0.249574	2.41e-05	0.179616	0.0332009	0.0018095	0.128837		0.570554	0.785793	0.767869	0.033704	0.566708
	WOOD PLANTS	Hardwood	Prune	-	Pit	Prunus		50.3497	6.69331	1.2987	0	0.0999001	39.6603	1.8981		52.0661	6.92149	41.0124		IEABCC		0.370428	0.226662	0.0021677	0.163846	0.112275	0.0374907	0.0871307		0.571116	0.804587	0.472205	0.128676	0.741519
	GRASS PLANTS	Other	Unidentified	Compost	-	-		38.9055	4.37811	1.19403	0.199005	0.497512	28.2587	26.5672		54.3811	6.11961	39.4993		IEABCC		0.355552	0.216525	0.0069189	0.0856155	0.240375	0.0613832	0.0336306		0.572283	0.821051	0.179364	0.220043	0.910909
	GRASS PLANTS	Grass	Barley	summer barley	Straw	Hordeum vulgare		46.86	5.31	0.73	0.12	0.98	40.12	5.88		50.7747	5.7536	43.4717		BIOBIB		0.387999	0.235856	0.0004707	0.178596	0.0634391	0.0166678	0.116971		0.572728	0.787622	0.632786	0.068622	0.634795
	GRASS PLANTS	Grass	Sorghum	-	Stalk	Sorghum		46.07	5.76	0.39	0.27	0	40.63	6.88		49.827	6.22972	43.9433		PHYLLIS 2		0.404647	0.245533	4.9e-06	0.178803	0.0362172	0.0004585	0.134336		0.573168	0.777753	0.751145	0.0276637	0.560728
	GRASS PLANTS	Grass	Barley	Summer	Straw	Hordeum		46.9	5.3	0.7	0.1	1	40.1	5.9		50.8126	5.74215	43.4453		IEABCC		0.387253	0.234227	0.0004197	0.17787	0.0649121	0.0157521	0.119566		0.573952	0.78375	0.626453	0.065297	0.631088
	GRASS PLANTS	Grass	Flax	-	Straw	Linum		47.8	5.4	0.7	0.1	0.3	41.6	4.1		50.4219	5.6962	43.8819		IEABCC		0.393741	0.238101	0.0001843	0.179153	0.0526466	0.0094407	0.126734		0.574003	0.780123	0.675502	0.0489041	0.601201
	GRASS PLANTS	Grass	Field Grass	-	-	Poaceae		46.7205	5.24723	2.11907	0.201816	0.706357	36.1251	8.87992		53.0355	5.95647	41.008		IEABCC		0.36107	0.21797	0.0032634	0.138387	0.160781	0.045306	0.0732218		0.574422	0.801837	0.345458	0.155839	0.797617
	GRASS PLANTS	Grass	bean plant	-	-	Fabaceae		42.86	4.81	3.62	0.12	0	33.18	15.41		53.0118	5.94929	41.039		PHYLLIS 2		0.361183	0.217505	0.0030996	0.138861	0.159783	0.0442814	0.0752868		0.575022	0.799571	0.347623	0.152475	0.792627
	GRASS PLANTS	Grass	Field Grass	-	-	Poaceae		46.31	5.2	2.37	0.2	0.75	35.82	9.35		53.0287	5.95443	41.0168		BIOBIB		0.36102	0.21725	0.0031021	0.138157	0.160947	0.0442904	0.0752333		0.575198	0.799149	0.344826	0.152621	0.793234
	WASTE MATERIALS	Wood waste	Particle Board	partly impregnant				48.6	6.08	3.92	0.06	0.39	39.65	1.3		51.5213	6.44546	42.0333		BIOBIB		0.399673	0.239941	0.166342	0.0679589	0.0004142	0.0842659	0.0414052		0.575777	0.999566	0.991138	0.80231	0.543991
	WOOD PLANTS	Softwood	Spruce	-	Bark	Picea		49.6047	5.63241	0.197628	0.0988142	0	40.8103	3.65613		51.6461	5.8642	42.4897		IEABCC		0.345636	0.205024	0.082538	0.201221	0.0011688	0.0415143	0.122898		0.578706	0.998675	0.991106	0.803584	0.543393
	WOOD PLANTS	Hardwood	Eucalyptus	-	Sawdust	Eucalyptus		48.2	5.3	0	0	0	42.2	4.3		50.3657	5.53814	44.0961		IEABCC		0.393905	0.233592	3.24e-05	0.176545	0.052148	0.0030052	0.140773		0.578773	0.763393	0.674269	0.0282251	0.572627
	GRASS PLANTS	Grass	Miscanthus	Three Annual	-	Miscanthus		48.49	5.42	0.56	0.05	0.21	41.81	3.46		50.6582	5.66235	43.6795		BIOBIB		0.388829	0.229819	9.65e-05	0.175469	0.0612931	0.0067411	0.137753		0.579581	0.763201	0.636461	0.0371159	0.590457
	GRASS PLANTS	Grass	Sunflower	-	Hull (seed)	Helianthus		50.0547	5.58482	0.327934	0.049687	0	42.373	1.60986		51.0697	5.69806	43.2323		PHYLLIS 2		0.382319	0.225855	0.0002737	0.173128	0.0752557	0.0129433	0.130225		0.579706	0.766405	0.584616	0.053655	0.620951
	GRASS PLANTS	Grass	Tobacco	-	Stalk	Nicotiana		49.3	5.5	0.5	0	0	42.3	2.4		50.7724	5.66426	43.5633		PHYLLIS 2		0.386794	0.227716	0.0001092	0.174408	0.0652492	0.0074337	0.138289		0.580542	0.76094	0.620448	0.0381487	0.594209
	WASTE MATERIALS	Wood waste	Salt impregnated wood	-				51	6.24	0.26	0.01	0.07	41.22	1.2		51.7977	6.3376	41.8647		BIOBIB		0.382092	0.223522	0.155381	0.0998945	0.000613	0.0773655	0.0611316		0.582089	0.999355	0.991016	0.805069	0.542927
	WASTE MATERIALS	Wood waste	Fir treated					50.19	6.24	1.89	0.01	0	40.44	1.23		51.8117	6.44162	41.7467		BIOBIB		0.391252	0.228668	0.171847	0.0758478	0.0004701	0.0854955	0.0464193		0.582315	0.999516	0.991006	0.805169	0.542912
	WASTE MATERIALS	Food industry waste	Tea					49.8462	5.64103	0.512821	0	0	40.5128	3.48718		51.9231	5.87607	42.2009		PHYLLIS 2		0.335425	0.194051	0.0833795	0.213627	0.0012576	0.041236	0.131023		0.584793	0.998595	0.990985	0.806245	0.542383
	WOOD PLANTS	Softwood	Mixed	Spruce + Pine	Bark - Untreated wood	-		50.3	5.8	0.42	0.03	0	40.65	2.8		51.9897	5.99483	42.0155		PHYLLIS 2		0.317376	0.18242	0.0571335	0.256151	0.0014856	0.0281396	0.157295		0.586371	0.998311	0.990962	0.806933	0.542086
	WOOD PLANTS	Hardwood	Oak	Red	Untreated Wood	Quercus		50.9344	5.96325	0.197458	0.148094	0	41.4564	1.30039		51.7868	6.06304	42.1502		PHYLLIS 2		0.370836	0.210413	0.0002019	0.158271	0.105245	0.0118693	0.143164		0.589499	0.739294	0.479105	0.0451458	0.624379
	WOOD PLANTS	Softwood	Spruce	-	Chips (wood)	Picea		50.0494	5.62685	0.0987167	0.0987167	0	42.6456	1.48075		50.9036	5.72289	43.3735		IEABCC		0.434467	0.24641	0.199928	0.03594	0.0168153	0.066439	0		0.589604	0.966206	0.634132	0.864871	1
	WOOD PLANTS	Hardwood	Olive	-	Stone	Olea europaea		51.38	6.32	0.45	0.08	0.06	40.02	1.69		52.5788	6.46746	40.9537		BIOBIB		0.373906	0.211475	0.304001	0.0119395	0.0410844	0.0575937	0		0.590275	0.930044	0.209438	0.921031	1
	WOOD PLANTS	Hardwood	Cotton	-	Trash (gin)	Gossypium		39.2291	5.21205	2.07095	0	0	36.0484	17.4396		48.7382	6.47544	44.7864		PHYLLIS 2		0.519258	0.293523	0.116744	0.0067648	0	0.0635826	0.0001281		0.590408	1	1	0.790499	0.974378
	WASTE MATERIALS	Wood waste	Forest residue	Finnish	chips			51.3	6.1	0.4	0.02	0.01	40.84	1.33		52.2191	6.20928	41.5717		BIOBIB		0.358387	0.201625	0.144232	0.139197	0.0008648	0.0699478	0.0857463		0.591558	0.999095	0.990831	0.809208	0.541339
	GRASS PLANTS	Grass	alfalfa	-	-	Medicago sativa		45.92	5.21	2.46	0.18	0.37	36.72	9.14		52.2709	5.93056	41.7985		BIOBIB		0.370326	0.207371	0.168581	0.106146	0.0006707	0.0814763	0.0654293		0.592686	0.999317	0.990801	0.809703	0.541183
	GRASS PLANTS	Grass	Intensive Grass	-	-	-		45.11	4.9	2.01	0.15	1.09	36.81	9.93		51.9581	5.64386	42.3981		BIOBIB		0.368131	0.20611	0.0001557	0.152889	0.113383	0.0105619	0.148769		0.592723	0.729836	0.451947	0.0398467	0.620938
	WOOD PLANTS	Softwood	Larch	European	Chips	Larix decidua		50.9	6.4	0	0	0	42	0.7		51.2588	6.44512	42.2961		BIOBIB		0.423779	0.23639	0.203365	0.0444788	0.0281702	0.0635078	0.000309		0.593616	0.958709	0.541909	0.87284	0.994802
	WASTE MATERIALS	Wood waste	Furniture waste					50.88	6.13	1.6	0.02	0.06	40.23	1.08		52.3241	6.30399	41.3719		BIOBIB		0.364085	0.202827	0.161788	0.119127	0.0007516	0.0779245	0.0734969		0.593931	0.99923	0.990779	0.810247	0.540967
	WASTE MATERIALS	Food industry waste	Grain screenings	-				46.3054	6.32937	2.06979	0.249975	0	35.7064	9.33907		52.4165	7.16469	40.4188		PHYLLIS 2		0.371875	0.205338	0.182353	0.0942936	0.0006046	0.0872808	0.0582553		0.596068	0.999396	0.99073	0.811183	0.540638
	WASTE MATERIALS	Wood waste	Mixed	-				50.7	5.91	1.68	0.06	0.16	40.09	1.4		52.4302	6.11169	41.4581		BIOBIB		0.342918	0.189172	0.132686	0.167289	0.0010416	0.0635004	0.103394		0.596292	0.998909	0.990741	0.811277	0.540537
	WOOD PLANTS	Softwood	Cedar	White	Untreated Wood	Cedrus		48.8	6.4	0	0	0	44.4	0.4		48.996	6.4257	44.5783		PHYLLIS 2		0.506469	0.278327	0.112582	0.0408007	0	0.0605037	0.0013175		0.597214	1	1	0.7927	0.957099
	WOOD PLANTS	Hardwood	Maple	-	Chips	Acer		49.54	6	0.1	0.02	0	43.84	0.5		49.8491	6.03743	44.1135		BIOBIB		0.471932	0.258298	0.137228	0.0629178	0.0054806	0.0622695	0.0018744		0.59819	0.989115	0.893458	0.820747	0.964368
	WASTE MATERIALS	Food industry waste	Grape	-	skins/seeds air dried			48.33	5.95	1.93	0	0	37.75	6.04		52.5155	6.46528	41.0192		PHYLLIS 2		0.374895	0.205175	0.194727	0.0815772	0.0005288	0.0926273	0.0504703		0.598204	0.999482	0.990684	0.812118	0.540299
	GRASS PLANTS	Grass	Alfalfa	Lucerne	-	Medicago sativa		44.2043	5.89391	2.4558	1.96464	0	36.2475	9.23379		51.1945	6.82594	41.9795		PHYLLIS 2		0.427855	0.233313	0.182938	0.0594028	0.0337955	0.0609313	0.0017646		0.599074	0.960192	0.553408	0.865334	0.977689
	WASTE MATERIALS	Wood waste	Uncontaminated waste wood	-				49.6	6.1	0.38	0.02	0.06	42.36	1.48		50.5813	6.22068	43.198		BIOBIB		0.447066	0.243559	0.158966	0.066961	0.0194873	0.0618337	0.0021268		0.5993	0.973368	0.70764	0.844426	0.969743
	ALGAE	Algae	Monodus	-	-	Monodus subterraneus		54.6516	6.65802	6.64803	0.439209	0	23.4378	8.1653		64.4876	7.8563	27.6561		PHYLLIS 2		0.0770625	0.0418611	0.478579	0.0042513	0.0714488	0.326797	0		0.6	0.8	0.8	0.79	1
	ALGAE	Algae	Chrorella	-	Residue after hot water extraction	Chlorella vulgaris		54.7298	6.95831	11.0757	0.730829	0	22.0587	4.44673		65.3515	8.30875	26.3397		PHYLLIS 2		0.0959625	0.0521278	0.365262	0.0095965	0.0555021	0.421549	0		0.6	0.8	0.8	0.69	1
	ALGAE	Algae	Chrorella	-	-	Chlorella vulgaris		53.723	7.27383	11.4477	0.699017	0	20.8388	6.01763		65.6474	8.88834	25.4642		PHYLLIS 2		0.152662	0.0829278	0.187334	0.0058137	0.0286021	0.542659	0		0.6	0.8	0.8	0.47	1
	ALGAE	Algae	Monodus	-	Residue after extraction III	Monodus subterraneus		41.8699	5.69106	6.85976	0.46748	0	17.002	28.1098		64.8513	8.81473	26.334		PHYLLIS 2		0.174319	0.0946917	0.174659	0.0032931	0.0263417	0.526695	0		0.6	0.8	0.8	0.46	1
	ALGAE	Algae	Chrorella	-	Residue after ethanol extraction	Chlorella vulgaris		50.6083	6.80096	11.5876	0.76785	0	22.3474	7.88791		63.4534	8.52713	28.0195		PHYLLIS 2		0.196763	0.106883	0.19079	0.005602	0.0290808	0.470882	0		0.6	0.8	0.8	0.51	1
	ALGAE	Algae	Synechococcus	-	Residue after PE extraction	Synechococcus		51.4598	6.97223	12.8114	0.734994	0	23.7036	4.31809		62.6522	8.48869	28.8591		PHYLLIS 2		0.223538	0.121428	0.166335	0.0010445	0.0247665	0.462889	0		0.6	0.8	0.8	0.48	1
	ALGAE	Algae	Synechococcus	-	Residue after PC extraction	Synechococcus		51.9642	7.07528	13.081	0.493624	0	23.7351	3.65076		62.778	8.54765	28.6744		PHYLLIS 2		0.225506	0.122497	0.151481	0.0021748	0.0227419	0.475599	0		0.6	0.8	0.8	0.45	1
	ALGAE	Algae	Synechococcus	-	-	Synechococcus		51.1426	7.30327	11.4286	0.651373	0	24.6633	4.81078		61.5366	8.78755	29.6758		PHYLLIS 2		0.303075	0.164633	0.0020785	0.0011362	0.0004812	0.528596	0		0.6	0.8	0.8	0.01	1
	WASTE MATERIALS	Food industry waste	Coffee	Spent				58.3601	8.03285	1.84148	0.129402	0	31.146	0.490147		59.8326	8.23553	31.9318		PHYLLIS 2		0.305044	0.165703	0.0991166	4.78e-05	0.0146702	0.415419	0		0.6	0.8	0.8	0.38	1
	ALGAE	Algae	Microalgae	-				52.8251	7.23302	8.02444	0.490884	0	28.902	2.52454		59.3806	8.13063	32.4887		PHYLLIS 2		0.309769	0.168269	0.11088	0.0011644	0.0165811	0.393336	0		0.6	0.8	0.8	0.42	1
	WASTE MATERIALS	Food industry waste	Olive		pomace pellets			51.42	6.56	1.98	0.11	0	34.38	5.55		55.6735	7.10264	37.2239		PHYLLIS 2		0.333788	0.181317	0.254544	0.0071731	0.0387525	0.184426	0		0.6	0.8	0.8	0.78	1
	WASTE MATERIALS	Food industry waste	Grapefruit	-	skin			51.6648	6.58934	1.71983	0	0	35.5264	4.49955		55.0912	7.02634	37.8825		PHYLLIS 2		0.34875	0.189444	0.249252	0.0047526	0.0375997	0.170201	0		0.6	0.8	0.8	0.79	1
	WASTE MATERIALS	Food industry waste	Brewing industries	-				51.1	6.87	4.66	0.44	0.01	32.52	4.4		56.4703	7.592	35.9377		BIOBIB		0.360563	0.195861	0.135711	0.0022189	0.0204157	0.285231	0		0.6	0.8	0.8	0.55	1
	WASTE MATERIALS	Grass plant waste	Rape residues	-				50.0998	6.88623	5.08982	0.798403	0	30.8383	6.28743		57.0455	7.84091	35.1136		IEABCC		0.367256	0.199497	0.0837537	0.0005123	0.0124685	0.336512	0		0.6	0.8	0.8	0.39	1
	WASTE MATERIALS	Other waste	Animal Waste	-				42.7	5.5	2.4	0.3	0	31.3	17.8		53.7107	6.91824	39.3711		BIOBIB		0.390094	0.211903	0.207698	0.0078898	0.0319318	0.150484	0		0.6	0.8	0.8	0.78	1
	WASTE MATERIALS	Wood waste	Mixed softwood residues					52.73	7.1	0.2	0.4	0	36.42	3.15		54.7844	7.37662	37.839		BIOBIB		0.4023	0.218533	0.116116	0.0015836	0.0174198	0.244047	0		0.6	0.8	0.8	0.55	1
	GRASS PLANTS	Grass	Hay	-	-	-		47.0709	5.96095	2.0555	0.513875	1.33607	38.0267	5.03597		51.693	6.54628	41.7607		IEABCC		0.425367	0.231063	0.233012	0.00182776	0.0347502	0.0739797	0		0.6	0.8	0.8	0.79	1
	WASTE MATERIALS	Wood waste	Forest residue	Swedish	chips			51	5.8	0.9	0.04	0.01	38.2	4.05		53.6842	6.10526	40.2105		BIOBIB		0.427894	0.232436	0.106394	0.0024272	0.0161104	0.214739	0		0.6	0.8	0.8	0.56	1
	WASTE MATERIALS	Food industry waste	Tea Waste	Camellia sinensis				48.6	5.5	0.5	0	0	44	1.4		49.5413	5.60652	44.8522		BIOBIB		0.430408	0.233802	0.000824	0.13973	0.0214788	0	0.173756		0.6	0.8	0.8	1	0.42
	GRASS PLANTS	Grass	Alfalfa	-	Stems	Medicago sativa		47.2089	6.00824	2.78988	0.199957	0	38.5156	5.27744		51.4636	6.54972	41.9867		PHYLLIS 2		0.434981	0.236286	0.216328	0.00401086	0.0326157	0.075778	0		0.6	0.8	0.8	0.79	1
	WASTE MATERIALS	Wood waste	Fiberboard					49.4036	6.46123	3.28032	0.0994036	0.0994036	39.2644	1.39165		51.9331	6.79206	41.2748		IEABCC		0.444431	0.241419	0.162936	0.0018107	0.0243808	0.125022	0		0.6	0.8	0.8	0.77	1
	WASTE MATERIALS	Food industry waste	orange		husk			51.42	7.2	1.34	0.08	0	37.16	2.8		53.6855	7.51723	38.7972		PHYLLIS 2		0.46215	0.251044	0.0093284	0.0004537	0.0014494	0.275574	0		0.6	0.8	0.8	0.08	1
	WASTE MATERIALS	Wood waste	Laminated	-				49.71	6.08	3.36	0.05	0.25	39.04	1.51		52.4201	6.41147	41.1684		BIOBIB		0.469238	0.254894	0.064303	0.0001415	0.0095343	0.201889	0		0.6	0.8	0.8	0.45	1
	ALGAE	Algae	Brown kelp giant	-	-	Phaeophyceae Laminariales		27.0477	3.73821	3.53765	1.06408	0	21.7886	42.8237		51.4464	7.11031	41.4433		PHYLLIS 2		0.501525	0.272433	0.0278426	0.0006117	0.0042124	0.193375	0		0.6	0.8	0.8	0.27	1
	WASTE MATERIALS	Food industry waste	Malt industries	-				45.1	6.24	4.69	0.36	0.68	36.93	6		51.0932	7.06922	41.8375		BIOBIB		0.510975	0.277567	0.0215927	0.0008465	0.0033237	0.185696	0		0.6	0.8	0.8	0.23	1
	GRASS PLANTS	Grass	Cattails	-	-	Typha		43.2538	5.28222	0.744542	0.0402455	0	42.7307	7.94849		47.3928	5.78768	46.8195		PHYLLIS 2		0.530501	0.288173	0.000658083	0.0343616	0.00534931	0	0.140957		0.6	0.8	0.8	1	0.18
	WASTE MATERIALS	Food industry waste	Rape seed	extraction material				43.2086	6.0012	5.60112	0.930186	0	37.0574	7.20144		50.087	6.95652	42.9565		PHYLLIS 2		0.53775	0.292111	0.0048145	0.000262	0.0007523	0.16431	0		0.6	0.8	0.8	0.07	1
	WASTE MATERIALS	Grass plant waste	Oat	-	Grain / Meal			47.0312	6.53992	1.94063	0.164954	0	41.219	3.10435		49.6161	6.89938	43.4845		PHYLLIS 2		0.548775	0.2981	0	0.0004618	7.06e-05	0.152593	0		0.6	0.8	0.8	-7.5287e-16	1
	WASTE MATERIALS	Grass plant waste	wheat grain	-	Grain / Meal			44.34	5.99	1.63	0.47	0	44.68	2.89		46.6688	6.3046	47.0266		PHYLLIS 2		0.594056	0.322697	0.0438291	0.0010216	0.00664	0.0317557	0		0.6	0.8	0.8	0.78	1
	GRASS PLANTS	Grass	Bean	-	Straw	Fabaceae		42.8586	5.5755	0.827848	0.00997407	0	44.8135	5.91462		45.9621	5.97925	48.0586		PHYLLIS 2		0.595313	0.32338	4.23367e-05	0.0162787	0.00249436	0	0.0624917		0.6	0.8	0.8	1	0.19
	WASTE MATERIALS	Other waste	Paper	Paper (average)				42.141	5.77732	0.280277	0.0904119	0	41.6708	10.0402		47.038	6.44868	46.5133		PHYLLIS 2		0.597206	0.324408	0.0136891	0.0001356	0.0020458	0.0625149	0		0.6	0.8	0.8	0.36	1
	WOOD PLANTS	Softwood	Larch	-	Log	Larix		-	-	-	-	-	-	-		52.1	6.4	41.5		BIOBIB		0.4013	0.217883	0.221907	0.0404495	0.0603512	0.0567709	0.0013395		0.600118	0.940557	0.322078	0.895183	0.98541
	WOOD PLANTS	Softwood	Larch	-	Untreated Wood	Larix		50.6667	6.37594	0	0	0	42.5063	0.451128		50.8963	6.40483	42.6989		PHYLLIS 2		0.437178	0.236924	0.167232	0.0673821	0.0280988	0.0607665	0.0024184		0.600562	0.966477	0.625485	0.854052	0.969778
	WOOD PLANTS	Softwood	Pine	-	-	Pinus		52.13	6.36	0.07	0.05	0.01	41.01	0.37		52.392	6.39196	41.2161		BIOBIB		0.393896	0.212731	0.232609	0.0332829	0.0715413	0.0544695	0.0014698		0.601391	0.934313	0.247509	0.903781	0.985054
	WASTE MATERIALS	Wood waste	Particle Board	pressed				49	5.89	5.93	0.13	0.01	38.14	0.9		52.6712	6.33129	40.9975		BIOBIB		0.357108	0.192611	0.175421	0.118173	0.0007633	0.0826297	0.0732947		0.601704	0.999237	0.990621	0.813647	0.539692
	WOOD PLANTS	Hardwood	Walnut	-	Hull	Junglans		49	5.7	1.7	0.1	0	34.7	8.8		54.8098	6.37584	38.8143		IEABCC		0.257215	0.138633	0.564344	0	0.0203088	0.0194987	0		0.601876	0.882062	0	0.985387	1
	WOOD PLANTS	Softwood	Douglas Fir	-	-	Pseudotsuga menziesii		52.3	6.3	0.1	0	0	40.32	0.98		52.871	6.36878	40.7602		BIOBIB		0.382749	0.204492	0.249775	0.0185715	0.0926269	0.0499195	0.0018666		0.603975	0.923987	0.123654	0.917549	0.98304
	WOOD PLANTS	Softwood	Pine	Mixed	-	Pinus		48.4	6.31	0.21	0.03	0	44.23	0.82		48.9185	6.3776	44.7039		BIOBIB		0.508195	0.271421	0.0987798	0.0624227	0	0.0560926	0.0030892		0.604057	1	1	0.783501	0.935719
	WOOD PLANTS	Hardwood	Olive	-	Residue	Olea		45.1469	5.62768	1.5503	0.107535	0	37.5567	10.0108		51.1109	6.37111	42.518		PHYLLIS 2		0.432042	0.2302	0.163587	0.0739546	0.0381205	0.0582045	0.0038921		0.604627	0.962003	0.568651	0.857223	0.960113
	WOOD PLANTS	Hardwood	Cotton	-	Husk (seeds)	Gossypium		48.48	6.12	0.97	0.1	0	41.48	2.85		50.458	6.36969	43.1724		PHYLLIS 2		0.451401	0.240273	0.141377	0.0833318	0.0206116	0.0588444	0.0041613		0.604868	0.976043	0.732996	0.834944	0.951646
	WOOD PLANTS	Hardwood	Cotton	-	Husk	Gossypium		48.48	6.12	0.97	0.1	0	41.48	2.85		50.458	6.36969	43.1724		BIOBIB		0.451401	0.240273	0.141377	0.0833318	0.0206116	0.0588444	0.0041613		0.604868	0.976043	0.732996	0.834944	0.951646
	WOOD PLANTS	Hardwood	Olive	-	Pit	Olea		48.7083	6.17905	0.521357	0.038619	0	42.1623	2.39037		50.189	6.36689	43.4441		PHYLLIS 2		0.459944	0.244718	0.132998	0.0850437	0.0143488	0.0587648	0.004183		0.604968	0.981875	0.801262	0.825689	0.948129
	WOOD PLANTS	Softwood	Pine	Corsican	-	Pinus		50.1	6	0.1	0	0	38.17	5.63		53.1452	6.3647	40.4901		BIOBIB		0.376135	0.199888	0.262176	0.0080836	0.104677	0.0470382	0.0020034		0.605252	0.917959	0.0516129	0.925804	0.982554
	WOOD PLANTS	Hardwood	Walnut	-	Shell	Junglans		36.5	4.4	1.4	0.1	0	28.3	29.3		52.7457	6.35838	40.896		IEABCC		0.388357	0.206177	0.234385	0.0245834	0.0935319	0.0502602	0.0027057		0.60549	0.926715	0.154003	0.911828	0.977012
	GRASS PLANTS	Grass	Jute	-	Stick	Corchorus		50.1598	7.12158	2.28701	0.241246	0	37.6151	2.57528		52.8574	7.50458	39.638		PHYLLIS 2		0.348685	0.18473	0.175273	0.128802	0.0008389	0.0815482	0.0801235		0.605988	0.999167	0.990536	0.815519	0.53898
	WOOD PLANTS	Softwood	Spruce	Sitka	Untreated Wood	Picea sitchensis		48.8248	5.83563	0.165343	0	0	42.4445	2.72973		50.2804	6.00962	43.7099		PHYLLIS 2		0.457133	0.240457	0.1297	0.0922398	0.0178456	0.0572592	0.0053654		0.607696	0.979972	0.776015	0.82609	0.941035
	WOOD PLANTS	Hardwood	Babassu	-	Husk	Attalea		50.3805	5.37753	0.260365	0.0400561	0	42.3493	1.59223		51.3525	5.48127	43.1663		PHYLLIS 2		0.426908	0.223633	0.160565	0.0770987	0.0506267	0.055474	0.0056949		0.60868	0.956881	0.504231	0.861423	0.950839
	WOOD PLANTS	Hardwood	Almond	-	Hull	Prunus		47.1471	5.90591	1.2012	0.1001	0	40.04	5.60561		50.6452	6.34409	43.0108		IEABCC		0.446167	0.233467	0.137619	0.0916856	0.0285768	0.0564841	0.0060002		0.608939	0.972001	0.681218	0.83743	0.941721
	WOOD PLANTS	Hardwood	Cocoa	-	Shell	Theobroma		46.3059	5.56878	3.20959	0.192027	0	36.1194	8.6043		52.6239	6.32859	41.0475		PHYLLIS 2		0.396335	0.206825	0.209125	0.033068	0.100329	0.0493215	0.004997		0.609591	0.92947	0.181879	0.903611	0.963249
	WOOD PLANTS	Hardwood	Mulberry	-	waste wood	Morus		49.8439	6.13944	0.416233	0	0	40.999	2.60146		51.3948	6.33047	42.2747		PHYLLIS 2		0.426258	0.222098	0.158472	0.0783164	0.0538306	0.0546727	0.0063511		0.609957	0.955925	0.491651	0.861713	0.947556
	WOOD PLANTS	Hardwood	Ailanthus	-	-	Ailanthus		49.5	6.2	0.3	0	0	42.3	1.7		50.5102	6.32653	43.1633		BIOBIB		0.450395	0.234265	0.130326	0.0969937	0.0255677	0.0557468	0.0067048		0.610372	0.975046	0.71537	0.831289	0.935764
	WASTE MATERIALS	Wood waste						51.38	5.88	0.1	0.1	0.02	42.22	0.3		51.6486	5.91074	42.4407		BIOBIB		0.420587	0.217881	0.163167	0.0730063	0.0652032	0.0531737	0.0069828		0.611331	0.950442	0.425887	0.869021	0.94648
	WOOD PLANTS	Softwood	Birch	Average	Untreated Wood	Betulaceae		48.7415	6.26038	0.188805	0.178868	0	44.0909	0.539514		49.1877	6.31769	44.4946		PHYLLIS 2		0.494571	0.255227	0.0929973	0.0981538	0	0.0524356	0.0066162		0.612242	1	1	0.784702	0.914436
	WOOD PLANTS	Softwood	Pine	-	Sawdust	Pinus		51.9895	6.27684	0.140377	0.0200538	0	41.1604	0.412807		52.2892	6.31303	41.3977		PHYLLIS 2		0.406645	0.209646	0.183183	0.0501658	0.0933571	0.04987	0.0071328		0.612474	0.936639	0.262824	0.889616	0.950684
	WASTE MATERIALS	Wood waste	Compost		bark			49.84	5.24	0.37	0.03	0.01	38.64	5.87		53.1797	5.59112	41.2292		BIOBIB		0.270131	0.138841	0.0618589	0.307022	0.0018886	0.0282152	0.192043		0.6132	0.997977	0.990426	0.818663	0.537639
	WOOD PLANTS	Hardwood	Olive	-	Residue - cakes from oil production	Olea		50.766	5.89767	1.36177	0.300391	0	37.0682	4.60599		54.1609	6.29206	39.5471		PHYLLIS 2		0.345113	0.176377	0.299654	0	0.138691	0.0353795	0.0047852		0.614543	0.896288	0	0.951028	0.966776
	WOOD PLANTS	Hardwood	Olive	-	Husk	Olea		50.1792	6.85177	1.11317	0.0767706	0	37.7807	3.9984		52.9251	7.22672	39.8482		PHYLLIS 2		0.395652	0.201891	0.200767	0.0213282	0.127555	0.0448647	0.0079417		0.614914	0.922957	0.0997835	0.908791	0.950952
	WOOD PLANTS	Hardwood	Palm	-	Shell (fruits)	Arecaceae (Palmaceae)		53.9215	6.10451	0.359676	0	0	37.1166	2.49775		55.5076	6.28407	38.2084		PHYLLIS 2		0.240064	0.122234	0.568448	0	0.0635025	0.0054674	0.0002845		0.615424	0.867149	0	0.995958	0.980228
	GRASS PLANTS	Grass	SugarCane	-	Fiber	Saccharum spp		44.5579	5.18674	0.510664	0.160208	0	33.884	15.7004		53.2807	6.20211	40.5172		PHYLLIS 2		0.326352	0.166147	0.169117	0.160363	0.00106	0.0765466	0.100413		0.615456	0.998955	0.99035	0.819659	0.537398
	WOOD PLANTS	Hardwood	Willow	willow variety	-	Salix		49.2853	5.97696	0.572052	0.0690408	0	42.7165	1.38014		50.302	6.10026	43.5977		PHYLLIS 2		0.456709	0.231922	0.113055	0.113091	0.0229739	0.0524851	0.0097643		0.616058	0.979558	0.762147	0.818808	0.916299
	WOOD PLANTS	Hardwood	Poplar	hybrid	Untreated wood	Populus		50.185	6.06061	0.60006	0.020002	0	40.434	2.70027		51.9086	6.26875	41.8227		PHYLLIS 2		0.418611	0.210713	0.151367	0.072839	0.0865136	0.0486594	0.0112966		0.618138	0.94493	0.353919	0.871222	0.9292
	WOOD PLANTS	Hardwood	Mango	-	Untreated wood	Mangifera		46.24	6.08	0.28	0	0	44.42	2.98		47.7982	6.28489	45.9169		PHYLLIS 2		0.554471	0.278932	0.0538622	0.0656801	0	0.0405896	0.0064645		0.618279	1	1	0.73169	0.879795
	WOOD PLANTS	Hardwood	Willow	Salix	-	Salix		48.5003	6.12471	0.497389	0.0195055	0	42.9998	1.85829		49.6803	6.27373	44.046		PHYLLIS 2		0.475305	0.238414	0.0936551	0.124534	0.0072087	0.0500398	0.010843		0.618964	0.993098	0.917749	0.794787	0.900151
	WOOD PLANTS	Other	Plywood scraps	-	-	-		54.74	6.13	0.31	0.04	0.03	37.25	1.5		55.7888	6.24745	37.9637		BIOBIB		0.229308	0.114779	0.583052	0	0.0722843	0	0.0005764		0.619463	0.861163	0	1	0.971475
	GRASS PLANTS	Grass	Tobacco	-	Leaves	Nicotiana		42.5743	4.45545	0.49505	0	0	35.4455	17.0297		51.6206	5.40216	42.9772		PHYLLIS 2		0.425321	0.212744	0.138748	0.086449	0.0754268	0.0488221	0.0124898		0.619626	0.951215	0.425996	0.85994	0.921289
	WOOD PLANTS	Softwood	Douglas Fir	-	Untreated Wood	Pseudotsuga menziesii		50.6314	6.22639	0.118598	0.0197663	0	42.5371	0.466687		50.9396	6.26429	42.7961		PHYLLIS 2		0.440575	0.220138	0.120474	0.108888	0.0472824	0.0500511	0.0125905		0.619878	0.965903	0.597926	0.836632	0.912431
	WOOD PLANTS	Softwood	Pine	-	Chips	Pinus		51.85	6.21	0.13	0.14	0.02	41.23	0.42		52.2208	6.25441	41.5248		BIOBIB		0.414297	0.20629	0.153247	0.0610691	0.106005	0.0460245	0.0130671		0.620696	0.938161	0.271804	0.879426	0.925298
	WOOD PLANTS	Softwood	Pine	-	Untreated wood	Pinus		51.4758	6.15967	0.158448	0.09903	0	41.1371	0.97		52.1155	6.23621	41.6483		PHYLLIS 2		0.41735	0.206407	0.14514	0.067924	0.103101	0.0456626	0.0144159		0.622291	0.94057	0.298324	0.874131	0.919209
	WOOD PLANTS	Unidentified	Unidentified	Wood	Briquette	-		50.98	6.2	0.18	0.01	0	42.23	0.4		51.2826	6.2368	42.4806		BIOBIB		0.433618	0.214249	0.122727	0.10297	0.0637493	0.0480399	0.0146474		0.622514	0.9586	0.509469	0.845602	0.908593
	WOOD PLANTS	Hardwood	Pistachio	-	Shell	Pistacia vera		49.5471	6.11803	0.622675	0.118605	0	42.3221	1.2714		50.5649	6.2437	43.1914		PHYLLIS 2		0.45029	0.222317	0.105932	0.123037	0.0354164	0.0486685	0.0143395		0.622692	0.974041	0.690312	0.82118	0.899538
	WOOD PLANTS	Hardwood	Peach	-	Pit	Prunus persica		51.2095	6.14078	0.396819	0.0396819	0	41.1402	1.073		51.9944	6.23489	41.7707		PHYLLIS 2		0.420229	0.206725	0.138236	0.0748911	0.0989611	0.045462	0.0154948		0.623543	0.943171	0.32747	0.868857	0.914034
	WASTE MATERIALS	Paper industry waste	paper sludge	Paper sludge other				38.0612	4.67191	0.74375	0.454915	0	28.1975	27.8707		53.6598	6.58658	39.7536		PHYLLIS 2		0.352707	0.173152	0.247606	0.0717068	0.0005027	0.109176	0.0451492		0.624025	0.999543	0.990157	0.823411	0.536069
	WASTE MATERIALS	Food industry waste	oil mill effluent concentrate	-				44.4616	5.99265	0.773246	1.21786	0	32.3797	15.1749		53.6756	7.23454	39.0898		PHYLLIS 2		0.304993	0.149442	0.163958	0.189	0.0012671	0.0722556	0.119084		0.624474	0.998763	0.990172	0.823601	0.535892
	WOOD PLANTS	Softwood	Unidentified	-	-	-		52.1	6.1	0.2	0	0	39.9	1.7		53.1091	6.21814	40.6728		BIOBIB		0.404233	0.197965	0.168104	0.0117052	0.163207	0.0391607	0.0156258		0.624597	0.919113	0.0442813	0.905642	0.924164
	WOOD PLANTS	Hardwood	Leucaena	-	Untreated wood	Leucaena leucocephala		45.5161	6.01321	1.17355	0.116385	0	45.0603	2.12049		47.1232	6.22552	46.6513		PHYLLIS 2		0.583218	0.2846	0.0351868	0.0587927	0	0.0307442	0.0074582		0.625435	1	1	0.701671	0.85027
	WOOD PLANTS	Unidentified	Unidentified	Wood	Bark	-		53.1	6.1	0.2	0	0	39	1.6		54.0733	6.21181	39.7149		BIOBIB		0.368959	0.179969	0.222131	0	0.180963	0.0338939	0.0140835		0.625535	0.89828	0	0.937474	0.932863
	WOOD PLANTS	Softwood	Cedar	-	Chips (Untreated Wood)	Cedrus		52.7447	6.13939	0.09999	0.009999	0	39.976	1.0299		53.3529	6.21017	40.4369		PHYLLIS 2		0.400862	0.195235	0.172503	0	0.17773	0.0371815	0.0164891		0.625889	0.91395	0	0.912526	0.923157
	WASTE MATERIALS	Wood waste	Particle Board	s.hardwoods				51.83	5.81	2.96	0.03	0.33	38.8	0.24		53.7433	6.02447	40.2323		BIOBIB		0.294106	0.143205	0.149963	0.211869	0.0014125	0.0658059	0.133638		0.625948	0.99861	0.990147	0.824244	0.53563
	WOOD PLANTS	Hardwood	Almond	-	Chips (wood)	Prunus		48.601	5.69948	0.621762	0.103627	0	37.513	7.46114		52.9345	6.20767	40.8578		IEABCC		0.40819	0.198671	0.156873	0.0235461	0.155922	0.0396152	0.0171826		0.626045	0.923022	0.0885463	0.89813	0.917686
	WOOD PLANTS	Hardwood	Walnut	-	Shell	Junglans		51.0024	6.04117	0.783296	0.0783296	0	40.3104	1.78447		52.3886	6.20537	41.406		PHYLLIS 2		0.415858	0.202155	0.140478	0.0568079	0.124522	0.0423682	0.0178114		0.626332	0.9348	0.226326	0.879359	0.910327
	WOOD PLANTS	Hardwood	Poplar	-	-	Populus		49.93	6.1	0.29	0.05	0.01	42.26	1.36		50.7987	6.20612	42.9952		BIOBIB		0.44543	0.215986	0.102446	0.12506	0.0471628	0.0461233	0.0177914		0.626921	0.969141	0.6283	0.824865	0.889617
	WOOD PLANTS	Hardwood	Poplar	aspen	-	Populus		47.6729	6.15326	0.197854	0.0098927	0	45.2888	0.677291		48.0986	6.2082	45.6932		PHYLLIS 2		0.539738	0.260697	0.0482855	0.10251	0	0.0362229	0.0125469		0.627833	1	1	0.732577	0.854769
	GRASS PLANTS	Grass	Rice	-	Shell	Oryza		41.3841	5.15052	0.510051	0.080008	0	35.5036	17.3717		50.445	6.27819	43.2768		PHYLLIS 2		0.454013	0.218809	0.0927487	0.136368	0.0342301	0.0453421	0.0184892		0.628348	0.976827	0.716869	0.811441	0.881117
	WOOD PLANTS	Softwood	Beech	Red beech	Log	Fagus		-	-	-	-	-	-	-		48.4	6.2	45.4		BIOBIB		0.526241	0.252799	0.0522399	0.116956	0	0.0374225	0.0143411		0.629103	1	1	0.741518	0.854544
	GRASS PLANTS	Grass	Wheat	Winter Mixed sample	-	Triticum		45.7542	5.09491	0.2997	0.0999001	0.3996	41.0589	7.29271		49.7826	5.54348	44.6739		IEABCC		0.471376	0.224266	0.075922	0.152966	0.0130041	0.0428257	0.0196401		0.631353	0.991124	0.881251	0.786134	0.864253
	WOOD PLANTS	Hardwood	Camphor	-	Chips (wood)	Cinnamomum camphora		50.3	6.1	0.1	0.2	0	42.5	0.8		50.8595	6.16785	42.9727		IEABCC		0.445057	0.210853	0.0932259	0.131551	0.05392	0.0429216	0.0224713		0.632334	0.967817	0.606939	0.82181	0.874188
	WOOD PLANTS	Hardwood	Willow	-	-	Salix		48.9756	5.98656	0.649857	0.0590779	0	42.093	2.23587		50.4616	6.16821	43.3702		PHYLLIS 2		0.453939	0.214925	0.0858322	0.143144	0.0373052	0.0428972	0.021958		0.632482	0.976457	0.708074	0.8081	0.868977
	WOOD PLANTS	Hardwood	Orange tree	-	Pruning	Citrus		46.45	5.29	1.03	0.09	0	42.76	4.38		49.1534	5.59788	45.2487		PHYLLIS 2		0.492122	0.232517	0.0623651	0.153952	0	0.0397658	0.0192782		0.632967	1	1	0.763198	0.851913
	WOOD PLANTS	Hardwood	Unidentified	-	-	-		47.1	5.52	0.43	0.07	0.02	36.92	9.94		52.6022	6.16484	41.233		BIOBIB		0.418212	0.197582	0.126084	0.0463669	0.149582	0.0378534	0.0243187		0.632984	0.930139	0.164499	0.880371	0.893043
	WOOD PLANTS	Softwood	Fir	-	-	Abies		50.35	6.14	0.05	0	0	43.18	0.28		50.5167	6.16033	43.323		BIOBIB		0.452704	0.21309	0.0845255	0.143842	0.0404773	0.0421047	0.0232564		0.633841	0.975182	0.691658	0.808814	0.865625
	WOOD PLANTS	Hardwood	Peanut	-	Hull	Arachis hypogaea		45.77	5.46	1.63	0.12	0	39.56	7.46		50.413	6.01388	43.5731		BIOBIB		0.455134	0.214119	0.0825309	0.146719	0.0363328	0.041997	0.0231662		0.633965	0.977452	0.71814	0.805131	0.864003
	GRASS PLANTS	Grass	Sunflower	-	Shell (seed)	Helianthus		50.8307	6.0048	0.590472	0.120096	0	39.3515	3.10248		52.8457	6.24285	40.9115		PHYLLIS 2		0.417163	0.195849	0.126887	0.0302755	0.168062	0.0358877	0.0258766		0.634446	0.92499	0.102556	0.887072	0.89152
	WOOD PLANTS	Softwood	Beech	Average	Untreated Wood	Fagus		48.3736	6.10117	0.336753	0.0297135	0	44.5108	0.647991		48.8693	6.1637	44.967		PHYLLIS 2		0.504378	0.236789	0.0548178	0.147319	0	0.0371	0.019596		0.634452	1	1	0.752259	0.844132
	WOOD PLANTS	Softwood	Spruce	-	Bark - Untreated Wood	Picea		50.1675	5.93961	0.415966	0.0290209	0	40.4358	3.01217		51.9639	6.1523	41.8838		PHYLLIS 2		0.426872	0.200273	0.108879	0.0858544	0.112796	0.0395218	0.0258028		0.634602	0.943985	0.325086	0.85709	0.880572
	WOOD PLANTS	Hardwood	Robinia	Black Locust	-	Robinia pseudoacacia		-	-	-	-	-	-	-		51.1855	6.14848	42.6661		NREL		0.439367	0.205728	0.0937411	0.123406	0.0712855	0.0410127	0.0254596		0.63506	0.960842	0.522227	0.830179	0.869899
	WOOD PLANTS	Unidentified	Unidentified	Average	Gum chips (Untreated Wood)	-		50.9911	6.06966	0.168878	0.0794718	0	42.0108	0.680136		51.469	6.12654	42.4045		PHYLLIS 2		0.434878	0.202582	0.0962735	0.112376	0.0870253	0.0398578	0.0270064		0.636251	0.954703	0.448969	0.838692	0.869734
	GRASS PLANTS	Grass	Barley	Winter	-	Hordeum		47.4372	5.92965	0.904523	0.201005	0.201005	41.005	4.32161		50.2662	6.28328	43.4505		IEABCC		0.458872	0.213269	0.075488	0.154939	0.0318544	0.0402128	0.0253658		0.636782	0.980733	0.75357	0.797306	0.853783
	WOOD PLANTS	Unidentified	Unidentified	Wood	Chips	-		50.63	6.02	0.35	0.03	0.02	41.52	1.43		51.5738	6.13222	42.294		BIOBIB		0.433718	0.200946	0.0954381	0.108546	0.0940083	0.0389209	0.0284228		0.637508	0.952451	0.421211	0.841037	0.867223
	WOOD PLANTS	Hardwood	Eucalyptus	-	Chips	Eucalyptus		50.43	6.01	0.17	0.08	0.02	41.53	1.76		51.4749	6.13453	42.3905		BIOBIB		0.435261	0.201629	0.0936926	0.113402	0.0885824	0.0391041	0.0283299		0.637545	0.954611	0.446497	0.837609	0.865921
	WOOD PLANTS	Hardwood	Eucalyptus	-	Untreated Wood	Eucalyptus		50.5011	6.02379	0.266627	0.0395003	0	41.5938	1.5752		51.4694	6.13929	42.3913		PHYLLIS 2		0.435372	0.201604	0.0934303	0.113728	0.0883893	0.0390642	0.0284119		0.637631	0.954724	0.447723	0.83735	0.8656
	WOOD PLANTS	Hardwood	Maple	-	Untreated Wood	Acer		50.64	6.02	0.25	0	0	41.74	1.35		51.4634	6.11789	42.4187		PHYLLIS 2		0.436013	0.200694	0.0904685	0.115514	0.0891888	0.0382853	0.0298356		0.639016	0.95496	0.449005	0.835665	0.861336
	GRASS PLANTS	Grass	Miscanthus	Italy	-	Miscanthus		47.9	6	0.6	0.55	0.33	41.31	3.31		50.3098	6.30186	43.3883		BIOBIB		0.458001	0.210426	0.0720076	0.158092	0.0348785	0.0386471	0.0279471		0.639442	0.9798	0.73977	0.796248	0.846356
	WOOD PLANTS	Hardwood	Olive	-	Kernel	Olea		52.702	5.89714	1.04816	0.254694	0	38.0375	2.06041		54.5362	6.10238	39.3614		PHYLLIS 2		0.36861	0.16848	0.180166	0	0.225563	0.0272841	0.0298969		0.640637	0.888474	0	0.938551	0.89319
	WOOD PLANTS	Hardwood	Sycamore	American	-	Platanus occidentalis		-	-	-	-	-	-	-		50.7528	6.10778	43.1394		NREL		0.448815	0.205119	0.0765745	0.14661	0.0546463	0.038045	0.0301904		0.640659	0.970317	0.627274	0.809987	0.847954
	WOOD PLANTS	Hardwood	Gmelina	-	Untreated wood	Gmelina Arborea		46.1523	6.01987	0.702318	0.190629	0	46.1523	0.782583		46.9388	6.12245	46.9388		PHYLLIS 2		0.589301	0.269289	0.0191432	0.0881789	0	0.0184503	0.0156374		0.64069	1	1	0.680737	0.802458
	WOOD PLANTS	Hardwood	Kikar (acacia)	-	Untreated wood	Vachellia nilotica		45.89	6.08	0	0	0	47.43	0.6		46.167	6.1167	47.7163		PHYLLIS 2		0.62342	0.284421	0.0105602	0.0589737	0	0.011476	0.0111495		0.641061	1	1	0.654105	0.792114
	WOOD PLANTS	Hardwood	Oak	Black	Untreated Wood	Quercus		48.8225	6.05573	0.148668	0.0198224	0	44.1741	0.779143		49.2896	6.11367	44.5968		PHYLLIS 2		0.484516	0.220915	0.0548396	0.177289	0.0003895	0.0355997	0.0264508		0.6412	1	0.996419	0.759944	0.828936
	WOOD PLANTS	Hardwood	Maple	-	-	Acer		50.6	6	0.3	0	0	41.7	1.4		51.4751	6.10376	42.4212		BIOBIB		0.436671	0.198608	0.0853403	0.117	0.0929069	0.036657	0.032816		0.64177	0.95457	0.441456	0.833666	0.85333
	WOOD PLANTS	Hardwood	Unidentified	-	Chips	-		50.48	6.04	0.17	0.08	0.02	42.43	0.78		51.0157	6.10409	42.8802		BIOBIB		0.444061	0.201819	0.0783202	0.137961	0.0685818	0.0371538	0.0321029		0.64194	0.964506	0.557762	0.817899	0.847338
	WOOD PLANTS	Softwood	Birch	-	-	Betula		49.85	6.72	0.1	0.5	0	42.54	0.29		50.2976	6.78035	42.922		BIOBIB		0.458425	0.208106	0.0676321	0.16251	0.0357578	0.0369689	0.0306002		0.642207	0.980058	0.739806	0.79322	0.837959
	WOOD PLANTS	Hardwood	Kenaf (italy)	-	-	Hibiscus cannabinus		46.6	5.8	1	0.14	0.17	42.62	3.67		49.0423	6.10398	44.8537		BIOBIB		0.495097	0.224382	0.0485376	0.171938	0	0.0331989	0.0268467		0.642587	1	1	0.750283	0.821862
	WOOD PLANTS	Hardwood	Olive	-	Residue - leeched	Olea		54.0716	5.80232	1.90076	0.30012	0	35.4942	2.43097		56.6978	6.08413	37.2181		PHYLLIS 2		0.246697	0.1118	0.425582	0	0.198912	0	0.0170093		0.642598	0.841859	0	1	0.91306
	WOOD PLANTS	Hardwood	Tan Oak	-	Untreated Wood	Notholithocarpus densiflorus		48.5	6.07744	0.0498151	0.0398521	0	44.983	0.34993		48.7141	6.10427	45.1816		PHYLLIS 2		0.509923	0.230978	0.0425039	0.160018	0	0.0308541	0.025723		0.64271	1	1	0.73897	0.817563
	WOOD PLANTS	Softwood	Pine	Eastern White pine	-	Pinus strobus		52.55	6.08	0	0	0	41.25	0.12		52.6131	6.0873	41.2996		BIOBIB		0.425372	0.19266	0.0998219	0.0482399	0.165829	0.0326464	0.0354298		0.642732	0.930183	0.154502	0.871056	0.863916
	WOOD PLANTS	Hardwood	Oak	American black oak	-	Quercus velutina		48.78	6.09	0	0	0	44.98	0.15		48.8533	6.09915	45.0476		BIOBIB		0.503844	0.22819	0.0448233	0.165096	0	0.031775	0.0262715		0.642744	1	1	0.74352	0.819071
	WOOD PLANTS	Hardwood	Palm	-	Pit	Arecaceae (Palmaceae)		48.1072	6.63582	2.80656	0.154243	0	36.7937	5.50246		52.555	7.24935	40.1956		PHYLLIS 2		0.425807	0.192769	0.0987565	0.0522573	0.16208	0.0328252	0.0355048		0.642837	0.931377	0.168397	0.86908	0.862945
	WOOD PLANTS	Hardwood	Peanut	-	Shell	Arachis hypogaea		46.9655	5.6423	1.84606	0.189339	0	40.1115	5.24528		50.6535	6.08536	43.2612		PHYLLIS 2		0.451217	0.203721	0.0705617	0.153587	0.0517262	0.0363779	0.0328093		0.643458	0.972519	0.650066	0.803875	0.838385
	WOOD PLANTS	Softwood	Spruce	-	Untreated Wood	Picea		49.529	6.06355	0.110065	0.0100059	0	43.9157	0.371598		49.7738	6.09351	44.1327		PHYLLIS 2		0.47101	0.212434	0.0583151	0.176294	0.0162075	0.0353022	0.0304373		0.643698	0.991418	0.871382	0.773964	0.827238
	WOOD PLANTS	Softwood	Pine	Monterey	-	Pinus Radiata		-	-	-	-	-	-	-		51.0876	6.07847	42.8339		NREL		0.443522	0.199185	0.0745347	0.137877	0.0742044	0.0354798	0.0351975		0.644676	0.963035	0.537571	0.817614	0.839983
	GRASS PLANTS	Grass	Alfalfa	-	Seed Straw	Medicago sativa		46.2284	5.33861	0.988631	0.0197726	0	40.257	7.16757		50.3445	5.81395	43.8415		PHYLLIS 2		0.457646	0.205356	0.064275	0.165027	0.0388885	0.0353947	0.0334129		0.644868	0.979125	0.726003	0.792161	0.83053
	WASTE MATERIALS	Wood waste	Pressure treated					53.07	6.15	0.24	0.03	0.1	38	2.41		54.5875	6.32586	39.0866		BIOBIB		0.296804	0.133182	0.22872	0.149843	0.0010825	0.0946488	0.0957192		0.644869	0.999013	0.98975	0.832522	0.532578
	GRASS PLANTS	Grass	Canary grass		-	Phalaris arundinacea		45	5.7	1.4	0.14	0.06	38.85	8.85		50.2513	6.36516	43.3836		BIOBIB		0.459723	0.206181	0.0628436	0.167843	0.0349263	0.0352373	0.0332464		0.644987	0.981179	0.749956	0.788822	0.829041
	WOOD PLANTS	Softwood	Birch	Alder	Untreated Wood	Betulaceae Alnus		48.8936	6.03699	0.219164	0.0697342	0	44.4306	0.349895		49.2079	6.0758	44.7163		PHYLLIS 2		0.48737	0.218131	0.0482076	0.183767	0	0.0325098	0.0300144		0.645458	1	1	0.752925	0.815178
	WOOD PLANTS	Softwood	Spruce	Sitka Spruce	Whole Tree	Picea sitchensis		50.2	5.9	0.2	0	0	41.14	2.56		51.6248	6.06746	42.3077		BIOBIB		0.436255	0.194911	0.0794051	0.112836	0.104872	0.0340234	0.0376979		0.64586	0.951608	0.40232	0.834438	0.842753
	WOOD PLANTS	Hardwood	Oak	-	-	Quercus		49.89	5.98	0.21	0.05	0.01	42.57	1.29		50.6806	6.07477	43.2446		BIOBIB		0.450939	0.20124	0.0668204	0.155567	0.0549296	0.0347814	0.0357231		0.646123	0.971801	0.638783	0.802474	0.830826
	WOOD PLANTS	Hardwood	Mixed	Average	Chips (Untreated Wood)	-		49.9955	5.97449	0.208067	0.0693556	0	42.8023	0.950285		50.6169	6.04875	43.3343		PHYLLIS 2		0.452195	0.201706	0.0658133	0.158007	0.0519179	0.034708	0.0356533		0.646231	0.973208	0.655159	0.800162	0.829727
	GRASS PLANTS	Vegetables	Courgette plant (zucchini)	-	-	Cucurbitaceae Cucurbita		33.88	3.7	4.7	0.13	0	27.84	29.75		51.7884	5.65576	42.5558		PHYLLIS 2		0.434792	0.19314	0.0790276	0.103999	0.116544	0.0328945	0.0396036		0.647178	0.947957	0.358092	0.838923	0.840834
	WOOD PLANTS	Hardwood	Casuarina	-	Untreated wood	Casuarina		48.5935	5.93757	0.452949	0.0196934	0	43.3748	1.62146		49.6329	6.06457	44.3025		PHYLLIS 2		0.474437	0.210092	0.0510986	0.185567	0.0123478	0.0324113	0.0340461		0.647892	0.994504	0.903044	0.765138	0.813013
	WOOD PLANTS	Hardwood	Grape	-	Pruning	Vitis		47.5657	5.84897	0.813173	0.0293918	0	43.1374	2.60537		49.2643	6.05784	44.6778		PHYLLIS 2		0.48457	0.21437	0.0461311	0.190696	0.0002601	0.0312301	0.0327419		0.648115	1	0.997774	0.752205	0.807878
	WASTE MATERIALS	Other waste	Waste Compost	-				39.1	4.44	1.23	0.18	0.46	27.89	26.7		54.7389	6.21588	39.0452		BIOBIB		0.280654	0.124086	0.213067	0.179018	0.0012899	0.0872561	0.11463		0.64825	0.998817	0.989687	0.833999	0.531997
	WOOD PLANTS	Softwood	Spruce	-	Whole Tree / thinning residues	Picea abies		48.46	5.84	0.21	0.01	0	44.88	0.6		48.8607	5.88828	45.2511		BIOBIB		0.502489	0.222153	0.0389997	0.176687	0	0.0283803	0.0312916		0.648263	1	1	0.738494	0.802667
	WOOD PLANTS	Hardwood	Poplar	Hybrid - Caudina, DN-34	-	Populus		-	-	-	-	-	-	-		52.1239	6.05158	41.8245		NREL		0.432149	0.190981	0.0807219	0.0835347	0.139585	0.0313257	0.0417026		0.648351	0.940736	0.272166	0.849152	0.841318
	WOOD PLANTS	Hardwood	Cocoa	-	Hull	Theobroma		49.2143	5.33673	3.04082	0.122449	0	33.8673	8.41837		55.6607	6.03578	38.3035		PHYLLIS 2		0.324904	0.143488	0.231731	0	0.246977	0.0176914	0.0352087		0.648506	0.864406	0	0.968887	0.882979
	WOOD PLANTS	Hardwood	Cocoa	-	Hull	Theobroma cacao		48.23	5.23	2.98	0.12	0	33.19	10.25		55.6607	6.03578	38.3035		BIOBIB		0.324904	0.143488	0.231731	0	0.246977	0.0176914	0.0352087		0.648506	0.864406	0	0.968887	0.882979
	WOOD PLANTS	Hardwood	Oak	Red oak	Chips	Quercus rubra		49.74	5.96	0.23	0.01	0.03	42.56	1.47		50.6208	6.06554	43.3137		BIOBIB		0.452577	0.199448	0.0616227	0.161192	0.0534474	0.033044	0.0386689		0.648992	0.973249	0.652667	0.797478	0.82146
	WOOD PLANTS	Softwood	Spruce	-	Chips (wood bark)	Picea		48.3934	5.55015	0.097371	0.097371	0	41.6748	4.18695		50.611	5.80448	43.5845		IEABCC		0.452765	0.199527	0.0614966	0.161558	0.0529721	0.0330391	0.0386414		0.648996	0.973465	0.655195	0.797135	0.82133
	WOOD PLANTS	Hardwood	Oak	White	Untreated Wood	Quercus		49.9021	5.97043	0.356443	0.00990121	0	42.8821	0.879033		50.5314	6.04572	43.4229		PHYLLIS 2		0.454295	0.200176	0.0604886	0.164415	0.0492155	0.0329919	0.0384183		0.649025	0.975193	0.675423	0.794393	0.820288
	WOOD PLANTS	Softwood	Fir	White Fir	-	Abies concolor		49	5.98	0.05	0.01	0.01	43.91	1.04		49.55	6.04712	44.4029		BIOBIB		0.476557	0.20965	0.0482285	0.18934	0.0097333	0.0312747	0.0352154		0.649388	0.996361	0.923205	0.760802	0.807522
	WOOD PLANTS	Hardwood	Pecan	-	Shell	Carya illinoinensis		54.5284	4.49882	0.828729	0.0887924	0	34.2837	5.77151		58.4373	4.82132	36.7414		PHYLLIS 2		0.0190599	0.0083625	0.0049302	0.535715	0.08261	0	0.349322		0.65	0.8	0.8	1	0.58
	WOOD PLANTS	Hardwood	Cotton	-	waste	Gossypium		49.04	4.71	1.45	0.36	0	35.08	9.36		55.2066	5.30226	39.4912		BIOBIB		0.173682	0.0762024	0.0008306	0.53811	0.0823695	0	0.128805		0.65	0.8	0.8	1	0.79
	WOOD PLANTS	Softwood	Spruce	-	Whole crop	Picea		53.1	5.2	0.5	0	0	38.6	2.6		54.7988	5.36636	39.8349		IEABCC		0.193066	0.0847069	0.0002435	0.545129	0.0833554	0	0.0934998		0.65	0.8	0.8	1	0.84
	WOOD PLANTS	Hardwood	Macadamia	-	-	Macadamia		54.41	4.99	0.36	0.01	0	39.67	0.56		54.9208	5.03684	40.0424		BIOBIB		0.195224	0.0856538	0.000538	0.31885	0.0488138	0	0.35092		0.65	0.8	0.8	1	0.45
	WOOD PLANTS	Hardwood	Macadamia	-	Shell	Macadamia		54.4917	4.9975	0.360541	0	0	39.7496	0.400601		54.9097	5.03583	40.0545		PHYLLIS 2		0.19564	0.0858361	6.51e-05	0.318826	0.0487401	0	0.350893		0.65	0.8	0.8	1	0.45
	WOOD PLANTS	Softwood	Pine	Pitch Pine	-	Pinus rigida		59	7.19	0	0	0	32.68	1.13		59.6743	7.27218	33.0535		BIOBIB		0.209819	0.0920572	0.406663	0.01504	0.0624588	0.213962	0		0.65	0.8	0.8	0.83	1
	WOOD PLANTS	Hardwood	Olive	-	Mash	Olea		61.1881	8.81188	1.48515	0.0990099	0.990099	22.4752	4.9505		66.167	9.52891	24.3041		IEABCC		0.22202	0.0974103	0.0026564	0.0017094	0.0006542	0.67555	0		0.65	0.8	0.8	0.01	1
	WOOD PLANTS	Softwood	Spruce	-	Bark	Picea abies		52.27	5.18	0.45	0.04	0.02	39.49	2.55		53.92	5.34351	40.7365		BIOBIB		0.239681	0.105159	0.0011198	0.424935	0.0651143	0	0.16399		0.65	0.8	0.8	1	0.7
	WOOD PLANTS	Softwood	Pine	Lodgepole Pine	Residue	Pinus contorta		53.6	6.2	0.1	0	0	35.41	4.69		56.2966	6.51192	37.1915		BIOBIB		0.256098	0.112362	0.467072	0.0279508	0.0733688	0.0631483	0		0.65	0.8	0.8	0.95	1
	WOOD PLANTS	Softwood	Spruce	-	Bark compost	Picea		49.8498	5.20521	0.4004	0	0	38.6386	5.90591		53.2051	5.55556	41.2393		IEABCC		0.272063	0.119367	0.0037017	0.499307	0.0768635	0	0.0286987		0.65	0.8	0.8	1	0.94
	WOOD PLANTS	Hardwood	Coconut	-	Fiber	Cocos nucifera		50.29	5.05	0.45	0.16	0.28	39.63	4.14		52.9536	5.31747	41.729		BIOBIB		0.290759	0.12757	0.0021964	0.301654	0.0464308	0	0.23139		0.65	0.8	0.8	1	0.54
	GRASS PLANTS	Grass	Alfalfa	Lucerne	-	Medicago sativa		46.7187	5.90236	3.10124	0.160064	0	35.6142	8.5034		52.9478	6.68934	40.3628		PHYLLIS 2		0.290759	0.12757	0.0021964	0.301654	0.0464308	0	0.23139		0.65	0.8	0.8	1	0.54
	WOOD PLANTS	Hardwood	Hazelnut	-	Seedcoat	Corylus avellana		51	5.4	1.3	0	0	40.5	1.8		52.6316	5.57276	41.7957		BIOBIB		0.301266	0.132179	0.00313	0.445333	0.0685293	0	0.0495631		0.65	0.8	0.8	1	0.89
	WOOD PLANTS	Hardwood	Walnut	-	Hull and blows	Junglans		53.5207	6.5213	1.53031	0.110022	0	35.3671	2.95059		56.096	6.8351	37.0689		PHYLLIS 2		0.306584	0.134513	0.366556	0.0084308	0.0555153	0.128402	0		0.65	0.8	0.8	0.88	1
	GRASS PLANTS	Grass	Malt	-	Husk	-		50.143	6.29171	4.48046	0.381316	0.285987	33.4604	4.9571		55.7794	6.99894	37.2216		IEABCC		0.309529	0.135805	0.38621	0.0009438	0.0572786	0.110233	0		0.65	0.8	0.8	0.9	1
	WOOD PLANTS	Softwood	Cypress	-	Untreated Wood	Cupressaceae		54.98	6.54	0	0	0	38.08	0.4		55.2008	6.56627	38.2329		PHYLLIS 2		0.30995	0.135989	0.394686	0.021402	0.0616594	0.076313	0		0.65	0.8	0.8	0.93	1
	WOOD PLANTS	Hardwood	Olive	-	Cake	Olea		51.475	6.84023	1.60364	0.178183	0	29.113	10.7899		58.8768	7.82382	33.2994		PHYLLIS 2		0.312895	0.137282	0.191687	0.001308	0.0285573	0.328271	0		0.65	0.8	0.8	0.6	1
	WOOD PLANTS	Hardwood	Olive	-	Flesh	Olea		50.1799	6.29748	1.39944	0.139944	0	32.0872	9.89604		56.6591	7.11061	36.2302		PHYLLIS 2		0.316681	0.138943	0.305737	0.0079676	0.0464472	0.184225	0		0.65	0.8	0.8	0.81	1
	GRASS PLANTS	Grass	Switchgrass	-	-	Poaceae		47.76	5.77	0.7	0.11	0.09	37.91	7.66		52.231	6.31015	41.4589		BIOBIB		0.331867	0.145605	0.0020163	0.114576	0.0178105	0	0.388125		0.65	0.8	0.8	1	0.21
	WOOD PLANTS	Hardwood	Grape	-	Seed	Vitis		54.0146	6.82932	1.45985	0.19998	0	34.9965	2.49975		56.3589	7.12572	36.5154		PHYLLIS 2		0.332248	0.145773	0.291396	0.0002949	0.043153	0.187135	0		0.65	0.8	0.8	0.8	1
	WOOD PLANTS	Hardwood	Walnut	-	Chips (wood)	Junglans		47.8558	5.75049	1.07212	0.0974659	0	34.6004	10.6238		54.2541	6.51934	39.2265		IEABCC		0.343607	0.150756	0.383305	0.0024088	0.0570727	0.0628492	0		0.65	0.8	0.8	0.94	1
	WOOD PLANTS	Softwood	Spruce	-	Mould shavings	Picea		51.1	5.5	0.1	0	0	42.3	1		51.6684	5.56117	42.7705		IEABCC		0.351112	0.154049	0.0020982	0.335163	0.0515379	0	0.10604		0.65	0.8	0.8	1	0.74
	GRASS PLANTS	Vegetables	Asparagus	-	Fern	Asparagus		45.7594	6.01578	1.77515	0.493097	1.28205	36.785	7.88955		51.6704	6.79287	41.5367		IEABCC		0.353235	0.154981	0.0014289	0.271561	0.0417178	0	0.177076		0.65	0.8	0.8	1	0.58
	WOOD PLANTS	Hardwood	Olive	-	Chips (wood)	Olea		51.2488	6.29371	1.0989	0.1998	0	36.4635	4.6953		54.5165	6.69501	38.7885		IEABCC		0.355388	0.155925	0.323854	0.0122327	0.0497793	0.102821	0		0.65	0.8	0.8	0.89	1
	WOOD PLANTS	Hardwood	Macadamia	-	Shell (nuts)	Macadamia		58.3	8.12	0.36	0.04	0	32.77	0.41		58.7761	8.18631	33.0376		PHYLLIS 2		0.364222	0.159801	0.0585651	0.0017306	0.0089284	0.406752	0		0.65	0.8	0.8	0.27	1
	WOOD PLANTS	Hardwood	Almond	-	-	Prunus		48.55	5.33	0.81	0.01	0.06	40.74	4.5		51.3105	5.63306	43.0564		BIOBIB		0.367979	0.16145	0.0018705	0.34685	0.0532905	0	0.0685601		0.65	0.8	0.8	1	0.82
	WOOD PLANTS	Hardwood	Almond	-	Shell (hulls)	Prunus		48.4261	5.97582	0.94355	0.0476541	0	39.896	4.71094		51.3544	6.33717	42.3085		PHYLLIS 2		0.369686	0.162198	0.0018717	0.242702	0.0373723	0	0.186169		0.65	0.8	0.8	1	0.54
	WOOD PLANTS	Hardwood	Grape	-	vines	Vitis		45.72	5.05	1.07	0.08	0	38.95	9.13		50.9585	5.62862	43.4128		PHYLLIS 2		0.386269	0.169474	0.0024504	0.307154	0.0473091	0	0.0873425		0.65	0.8	0.8	1	0.76
	WOOD PLANTS	Hardwood	Poplar	Hybrid - DN-34	-	Populus		-	-	-	-	-	-	-		50.9264	5.65053	43.4231		NREL		0.387154	0.169863	0.0016832	0.320075	0.0491704	0	0.0720548		0.65	0.8	0.8	1	0.8
	WOOD PLANTS	Unidentified	Chaparral	-	Untreated wood	-		47.4456	5.1391	0.546282	0.030349	0	40.6373	6.20132		50.8953	5.51275	43.592		PHYLLIS 2		0.39232	0.172129	0.0020448	0.214669	0.0331133	0	0.185723		0.65	0.8	0.8	1	0.51
	WOOD PLANTS	Hardwood	Oak	White oak	-	Quercus alba		49.48	5.38	0.35	0.01	0.04	43.13	1.61		50.4949	5.49036	44.0147		BIOBIB		0.413472	0.18141	0.0015392	0.157481	0.0242976	0	0.221801		0.65	0.8	0.8	1	0.39
	WOOD PLANTS	Hardwood	Olive	-	Husk exausted	Olea		-	-	-	-	-	-	-		54.2155	7.08159	38.7029		PHYLLIS 2		0.41555	0.182321	0.190601	0.0019418	0.0284936	0.181092	0		0.65	0.8	0.8	0.73	1
	GRASS PLANTS	Grass	Miscanthus	-	Whole crop	Miscanthus		48.2	5.4	0.4	0.1	0.2	42.1	3.6		50.3657	5.64263	43.9916		IEABCC		0.419436	0.184026	0.00135	0.178734	0.0275181	0	0.188936		0.65	0.8	0.8	1	0.46
	WOOD PLANTS	Hardwood	Olive	-	Orujillo	Olea		50	6.5	0.8	0.1	0	36.3	6.3		53.8793	7.00431	39.1164		PHYLLIS 2		0.419758	0.184167	0.193858	0.0065444	0.0296788	0.165994	0		0.65	0.8	0.8	0.75	1
	WOOD PLANTS	Hardwood	Peach	-	Pit	Prunus persica		53.1469	7.19281	0.599401	0	0	35.8641	3.1968		55.244	7.47664	37.2793		IEABCC		0.423123	0.185644	0.111022	0.0004608	0.0164945	0.263256	0		0.65	0.8	0.8	0.52	1
	WOOD PLANTS	Hardwood	Cherry	-	Pit	Prunus		53.41	7.04	0.3	0.3	0	38.05	0.9		54.2234	7.14721	38.6294		PHYLLIS 2		0.424386	0.186198	0.162703	0.0051701	0.0248598	0.196684	0		0.65	0.8	0.8	0.68	1
	WOOD PLANTS	Hardwood	Grape	-	Stems	Vitis		49.7309	6.67384	1.82992	0.107643	0	35.4144	6.24327		54.1618	7.26846	38.5698		IEABCC		0.442056	0.19395	0.123823	0.0007072	0.018426	0.221037	0		0.65	0.8	0.8	0.59	1
	WOOD PLANTS	Softwood	Pine	Yellow Pine	-	Pinus		52.6	7.02	0	0	0	40.07	0.31		52.7636	7.04183	40.1946		BIOBIB		0.471506	0.206872	0.12665	0.0009145	0.0188758	0.175182	0		0.65	0.8	0.8	0.65	1
	WOOD PLANTS	Softwood	Unidentified	Untreated Wood Average	-	-		50.9566	6.86122	0.193274	0.386547	0	38.4905	3.11191		52.9099	7.12422	39.9659		PHYLLIS 2		0.475713	0.208718	0.107394	0.0005016	0.0159641	0.19171	0		0.65	0.8	0.8	0.59	1
	WOOD PLANTS	Hardwood	Olive	-	Pit	Olea		49.8501	6.59341	0.699301	0.2997	0.0999001	39.0609	3.3966		52.1967	6.90377	40.8996		IEABCC		0.477817	0.20964	0.140429	0.0034666	0.0213043	0.147343	0		0.65	0.8	0.8	0.71	1
	WOOD PLANTS	Hardwood	Palm	-	Fiber (mesocarp)	Arecaceae (Palmaceae)		46.92	5.89	1.12	0.09	0	42.66	3.32		49.1463	6.16948	44.6842		PHYLLIS 2		0.480486	0.210811	0.0002981	0.0918436	0.0140818	0	0.202479		0.65	0.8	0.8	1	0.29
	GRASS PLANTS	Grass	Sericea Lespedeza	Serala	-	Lespedeza		-	-	-	-	-	-	-		52.0742	5.8963	42.0295		NREL		0.48581	0.213148	0.125722	0.0041127	0.0192274	0.151979	0		0.65	0.8	0.8	0.68	1
	WOOD PLANTS	Softwood	Pine	-	Sawdust	Pinus		52.49	6.24	0.15	0.03	0.04	40.45	0.6		52.924	6.29159	40.7844		BIOBIB		0.489176	0.214624	0.0685681	0.0019148	0.0104363	0.21528	0		0.65	0.8	0.8	0.45	1
	WOOD PLANTS	Hardwood	Oak	Pyrenian	Untreated Wood	Quercus pyrenaica		49.1647	6.46187	1.64466	0.0194635	0	40.1629	2.54643		51.3258	6.74591	41.9283		PHYLLIS 2		0.495908	0.217578	0.144507	0.0029537	0.0218292	0.117224	0		0.65	0.8	0.8	0.76	1
	GRASS PLANTS	Grass	Alfalfa	-	Stem	Medicago		46.7197	5.96421	2.7833	0.198807	0.497018	38.5686	5.26839		51.1983	6.53595	42.2658		IEABCC		0.502219	0.220347	0.132861	0.0043411	0.0203184	0.119914	0		0.65	0.8	0.8	0.74	1
	WOOD PLANTS	Hardwood	Elm	-	-	Ulmus		50.35	6.57	0	0	0	42.34	0.74		50.7254	6.61898	42.6557		BIOBIB		0.504743	0.221454	0.159938	1.51e-05	0.0236629	0.0901868	0		0.65	0.8	0.8	0.82	1
	WOOD PLANTS	Hardwood	Unidentified	-	Bark	-		50.35	5.83	0.11	0.07	0.03	39.62	3.99		52.5574	6.08559	41.357		BIOBIB		0.507267	0.222562	0.0422005	0.0014165	0.0064595	0.220095	0		0.65	0.8	0.8	0.33	1
	WOOD PLANTS	Hardwood	Elm	-	Untreated Wood	Ulmus		50.4	6.6	0	0	0	42.3	0.7		50.7553	6.64653	42.5982		PHYLLIS 2		0.507267	0.222562	0.150475	0.0006936	0.0223667	0.0966355	0		0.65	0.8	0.8	0.8	1
	WOOD PLANTS	Hardwood	Oak	White American oak	-	Quercus alba		50.44	6.59	0	0	0	42.73	0.24		50.5613	6.60585	42.8328		BIOBIB		0.510212	0.223854	0.148697	0.0048933	0.0227455	0.0895986	0		0.65	0.8	0.8	0.81	1
	GRASS PLANTS	Grass	Wheat	-	-	Triticum aestivum		42.29	5.05	1.83	0.15	0.28	37.15	13.25		50.0533	5.97704	43.9697		BIOBIB		0.524096	0.229945	0.146231	0.0010041	0.0217862	0.076938	0		0.65	0.8	0.8	0.83	1
	WOOD PLANTS	Hardwood	Coffee	-	Husk	Coffea		44.98	5.24	0.946667	0.23	0	43.0667	5.53667		48.217	5.61709	46.1659		PHYLLIS 2		0.528581	0.231913	0.0006296	0.0026443	0.0004973	0	0.235735		0.65	0.8	0.8	1	0.01
	WOOD PLANTS	Hardwood	Coconut	-	Untreated wood - trunk	Cocos		42.4424	5.13514	0.03003	0.04004	0	40.8408	11.5115		48.0018	5.80777	46.1904		PHYLLIS 2		0.534835	0.234657	0.0001366	0.118046	0.0180627	0	0.0942635		0.65	0.8	0.8	1	0.53
	GRASS PLANTS	Grass	Grass from reserve nature	-	-	Poaceae		43.2808	5.50321	2.19953	0.254129	0	36.6822	12.0801		50.6408	6.43904	42.9201		PHYLLIS 2		0.539663	0.236775	0.0682816	0.0014474	0.0103225	0.143511	0		0.65	0.8	0.8	0.55	1
	GRASS PLANTS	Grass	SugarCane	-	Bagasse	Saccharum spp		-	-	-	-	-	-	-		50.3014	5.96384	43.7348		NREL		0.542608	0.238067	0.0796168	0.0022374	0.0121201	0.125351	0		0.65	0.8	0.8	0.62	1
	WOOD PLANTS	Hardwood	Oak	American red oak	-	Quercus rubra		49.49	6.62	0	0	0	43.74	0.15		49.5643	6.62994	43.8057		BIOBIB		0.554808	0.24342	0.0906381	0.0022764	0.0137566	0.0951004	0		0.65	0.8	0.8	0.71	1
	WOOD PLANTS	Hardwood	Poplar	-	Leaves	Populus		39.8	5.38	3.09	0.24	0	35.42	16.07		49.3797	6.67494	43.9454		PHYLLIS 2		0.56743	0.248958	0.0686633	0.0010419	0.010317	0.10359	0		0.65	0.8	0.8	0.63	1
	GRASS PLANTS	Grass	Miscanthus	-	Sillage dried	Miscanthus		47.5512	5.81617	0.401115	0.0668525	0	41.9261	4.23856		49.8998	6.10343	43.9968		PHYLLIS 2		0.578369	0.253757	0.0091485	8.53e-05	0.0013664	0.157274	0		0.65	0.8	0.8	0.13	1
	WOOD PLANTS	Hardwood	Hickory	-	Untreated wood	Carya		48.6429	6.62245	0	0	0	43.9898	0.744898		49.0079	6.67215	44.3199		PHYLLIS 2		0.582997	0.255788	0.0495301	0.0002243	0.0073615	0.1041	0		0.65	0.8	0.8	0.55	1
	WOOD PLANTS	Softwood	Pine	-	Needles	Pinus		48.21	6.57	0	0	0	43.72	1.5		48.9442	6.67005	44.3858		PHYLLIS 2		0.585941	0.25708	0.0457543	0.0001973	0.0067989	0.104228	0		0.65	0.8	0.8	0.53	1
	WOOD PLANTS	Hardwood	Eucalyptus	-	Stems	Eucalyptus		47.342	6.51956	0.501505	0.100301	0	44.1324	1.40421		48.3112	6.65302	45.0358		PHYLLIS 2		0.609923	0.267601	0.0185345	2.17e-05	0.0027452	0.101175	0		0.65	0.8	0.8	0.32	1
	WOOD PLANTS	Hardwood	Coconut	-	Coir (fibre) dust	Cocos		47.17	6.54	0	0	0	43.39	2.9		48.5788	6.73532	44.6859		PHYLLIS 2		0.610042	0.267654	0.0019404	0.0003915	0.0003469	0.119626	0		0.65	0.8	0.8	0.04	1
	WOOD PLANTS	Unidentified	Unidentified	Wood	Sawdust pellets	-		47.2	6.5	0	0	0	45.3	1		47.6768	6.56566	45.7576		BIOBIB		0.626448	0.274852	0.01109	0.0004383	0.0017076	0.0854639	0		0.65	0.8	0.8	0.25	1
	WOOD PLANTS	Hardwood	Mixed	-	Chips	-		50.09	5.94	0.26	0.05	0.05	42.3	1.31		50.9407	6.04088	43.0184		BIOBIB		0.4472	0.195988	0.0634738	0.149756	0.0702326	0.0322606	0.041089		0.650254	0.966358	0.570513	0.807104	0.821495
	WOOD PLANTS	Hardwood	Pistachio	-	Shell	Pistacia vera		48.8511	6.29371	0.4995	0.1998	0	42.8571	1.2987		49.8471	6.42202	43.7309		IEABCC		0.469048	0.205199	0.0501988	0.185691	0.0209517	0.0311738	0.0377384		0.650658	0.989902	0.846107	0.769743	0.807296
	GRASS PLANTS	Grass	Corn	-	Straw	Zea mays		46.91	5.47	0.56	0.04	0.25	42.78	3.99		49.2959	5.74821	44.9559		BIOBIB		0.483286	0.211159	0.0433288	0.195294	0.0016536	0.0295795	0.0356991		0.650947	1	0.98634	0.750641	0.799818
	WOOD PLANTS	Unidentified	Unidentified	Wood	Sawdust	-		49	6	0	0.1	0	44.4	0.5		49.2958	6.03622	44.668		BIOBIB		0.483286	0.211159	0.0433288	0.195294	0.0016536	0.0295795	0.0356991		0.650947	1	0.98634	0.750641	0.799818
	GRASS PLANTS	Grass	Fescue	-	Straw	Festuca		45.3823	5.56107	0.595829	0.0993049	0.695134	42.1053	5.56107		48.7727	5.97652	45.2508		IEABCC		0.505907	0.221017	0.0347988	0.178727	0	0.0260527	0.0334976		0.650973	1	1	0.732973	0.793541
	WOOD PLANTS	Hardwood	Poplar	Coarse	-	Populus		50.8403	5.89236	0.590236	0.020008	0	41.0564	1.60064		51.9898	6.02558	41.9847		PHYLLIS 2		0.434602	0.189638	0.0734479	0.0935223	0.133631	0.0300693	0.0450893		0.651246	0.943699	0.303785	0.841751	0.831039
	WOOD PLANTS	Unidentified	Unidentified	Average	Bark (Untreated Wood)	-		52.4431	5.77673	0.394743	0.0288836	0	37.7509	3.60567		54.6449	6.01926	39.3359		PHYLLIS 2		0.376392	0.163949	0.139589	0	0.250668	0.0238932	0.0455087		0.651646	0.886479	0	0.931241	0.861426
	WOOD PLANTS	Hardwood	Peach	-	Stone	Prunus persica		53	5.9	0.32	0.05	0	39.14	1.59		54.0596	6.01795	39.9225		BIOBIB		0.399283	0.173755	0.112471	0	0.242161	0.0250055	0.0473244		0.65186	0.899007	0	0.911361	0.85387
	WOOD PLANTS	Hardwood	Olive	-	Branches	Olea		47.7277	5.85586	0.580581	0	0	43.6036	2.23223		49.1091	6.02534	44.8656		PHYLLIS 2		0.490728	0.213044	0.0387315	0.19358	0	0.0275622	0.0363548		0.652398	1	1	0.742787	0.79321
	WOOD PLANTS	Softwood	Fir	-	Untreated Wood	Abies		51.3572	5.99034	0.0599034	0.0299517	0	42.2019	0.360721		51.5896	6.01745	42.3929		PHYLLIS 2		0.439039	0.190287	0.066469	0.118831	0.109289	0.0300673	0.0460163		0.652775	0.952359	0.403675	0.826699	0.821695
	WOOD PLANTS	Softwood	Spruce	-	Saw shavings	Picea		50.2498	5.99401	0.0999001	0	0	43.3566	0.2997		50.4514	6.01805	43.5306		IEABCC		0.456303	0.197402	0.053625	0.171878	0.0475375	0.030415	0.0428396		0.653197	0.976983	0.691911	0.787624	0.806845
	WOOD PLANTS	Softwood	Unidentified	Lumped softwood	-	-		50	6	0	0.1	0	43.6	0.3		50.2008	6.0241	43.7751		BIOBIB		0.461311	0.199486	0.0507624	0.180089	0.0362437	0.0301161	0.0419918		0.65329	0.982383	0.755121	0.779055	0.803589
	WOOD PLANTS	Hardwood	Almond	-	Shell	Prunus		48.04	5.79	0.72	0.04	0.03	42.32	3.06		49.9636	6.02184	44.0146		BIOBIB		0.466408	0.201687	0.048172	0.186594	0.0263235	0.0297632	0.0410521		0.653294	0.987458	0.814614	0.771081	0.800776
	WOOD PLANTS	Softwood	Fir	-	Untreated Wood	Abies concolor		49.8449	5.98537	0.179262	0.00995902	0	43.6006	0.379886		50.1302	6.01963	43.8502		PHYLLIS 2		0.46279	0.200103	0.0499599	0.182171	0.0332238	0.0300082	0.0417444		0.653316	0.983895	0.77282	0.776656	0.802677
	GRASS PLANTS	Grass	Sudan grass	-	-	Poaceae		45.0076	5.40131	1.22161	0.0807673	0	39.5558	8.73296		50.0281	6.00382	43.9681		PHYLLIS 2		0.464962	0.201009	0.0488129	0.18498	0.0290173	0.0298357	0.0413834		0.653353	0.986055	0.798104	0.773228	0.801374
	GRASS PLANTS	Grass	Wheat	Winter	Whole crop	Triticum		46.3147	5.27888	1.19522	0.0996016	0.199203	41.5339	5.37849		49.7326	5.66845	44.5989		IEABCC		0.471886	0.203903	0.0453715	0.192251	0.0171535	0.0291886	0.0402462		0.653464	0.992535	0.873956	0.762945	0.797466
	GRASS PLANTS	Grass	Wheat	Danish	Straw	Triticum		46.3755	5.85213	0.535427	0.140902	0	41.7258	5.37026		49.3601	6.22875	44.4111		PHYLLIS 2		0.481273	0.207833	0.0411149	0.198841	0.0040828	0.0281248	0.0387298		0.653601	1	0.967506	0.750263	0.792647
	WOOD PLANTS	Hardwood	Eucalyptus	-	Untreated Wood	Eucalyptus globulus		48.2862	5.93305	0.39086	0.010022	0	44.2774	1.10243		49.0232	6.02361	44.9532		PHYLLIS 2		0.494166	0.213362	0.036091	0.1929	0	0.0262141	0.0372668		0.653642	1	1	0.738858	0.78853
	WOOD PLANTS	Hardwood	Robinia	-	Log	Robinia		-	-	-	-	-	-	-		49.2	5.9	44.9		BIOBIB		0.486212	0.209911	0.0389981	0.199367	0	0.0274634	0.0380482		0.65366	1	1	0.744779	0.790562
	WOOD PLANTS	Hardwood	Cotton	-	Stalks	Gossypium		44.8761	5.53865	1.04082	0.315963	0	41.5678	6.66069		48.7876	6.02142	45.1909		PHYLLIS 2		0.504788	0.217785	0.0321809	0.184518	0	0.0243702	0.0363579		0.653812	1	1	0.730726	0.785222
	WASTE MATERIALS	Wood waste	Particle Board	s.pine fine				52.99	6.09	2.95	0.03	0.13	37.26	0.55		55.0031	6.32136	38.6755		BIOBIB		0.281465	0.121208	0.239722	0.158334	0.0011704	0.0963081	0.101792		0.654236	0.998949	0.989561	0.836618	0.531032
	GRASS PLANTS	Grass	SugarCane	-	Bagasse	Saccharum spp		46.95	5.47	1.71	0.09	1.12	39.83	4.83		50.8943	5.92954	43.1762		BIOBIB		0.448807	0.193117	0.0565711	0.155661	0.0702038	0.0297848	0.0458561		0.654415	0.9675	0.579416	0.801363	0.808443
	GRASS PLANTS	Grass	Rape (Canola-colza)	Summer	Straw	Brassica napus		44.66	5.13	1.4	0.3	0.98	37.8	9.73		50.9876	5.85683	43.1556		BIOBIB		0.447355	0.192451	0.0574807	0.151411	0.0753349	0.0297259	0.0462408		0.654463	0.965452	0.555347	0.804536	0.809431
	WOOD PLANTS	Softwood	Beech	-	-	Fagus		49.69	6.07	0.41	0.02	0	42.8	1.01		50.416	6.15869	43.4253		BIOBIB		0.457106	0.196607	0.0514544	0.174509	0.0465088	0.0295909	0.0442233		0.654508	0.977758	0.699579	0.785164	0.802505
	WOOD PLANTS	Hardwood	Peanut	-	Hull	Arachis hypogaea		46.5001	5.54709	1.656	0.121914	0	40.191	5.98395		50.413	6.01388	43.5731		PHYLLIS 2		0.457106	0.196607	0.0514544	0.174509	0.0465088	0.0295909	0.0442233		0.654508	0.977758	0.699579	0.785164	0.802505
	WOOD PLANTS	Hardwood	Prune	-	Pit	Prunus		49.4707	6.24695	0.584105	0.0693005	0	42.6693	0.959616		50.2817	6.34937	43.3689		PHYLLIS 2		0.459765	0.197634	0.0498442	0.179176	0.0403511	0.0293823	0.0438472		0.654641	0.980676	0.733648	0.780455	0.800497
	WOOD PLANTS	Softwood	Mixed	(Spruce + Beech)	-	-		49.73	5.95	0.22	0.02	0.01	43.4	0.67		50.1918	6.00525	43.803		BIOBIB		0.461602	0.198395	0.0488441	0.18203	0.0363512	0.0292552	0.0435231		0.654674	0.98262	0.756404	0.77737	0.799325
	WOOD PLANTS	Softwood	Pine	Radiata	Sawdust	Pinus Radiata		49.445	5.95358	0.302725	0.100908	0	43.5923	0.605449		49.949	6.01427	44.0367		IEABCC		0.466773	0.200539	0.046172	0.188874	0.0261874	0.0288312	0.0426237		0.654763	0.987804	0.817085	0.769144	0.796199
	WASTE MATERIALS	Other waste	Municipal Solid Waste	-				47.6	6	1.2	0.3	0	32.9	12		55.0289	6.93642	38.0347		BIOBIB		0.342743	0.147153	0.356153	0.0068635	5.48e-05	0.142621	0.0044123		0.654914	0.999951	0.989516	0.836924	0.531053
	WOOD PLANTS	Hardwood	Madrone	-	Untreated Wood	Arbutus		48.5625	6.01668	0.0498896	0.0199558	0	44.9904	0.360505		48.7724	6.04269	45.1849		PHYLLIS 2		0.505485	0.216751	0.030507	0.186254	0	0.0233413	0.0376615		0.6552	1	1	0.728698	0.780828
	WOOD PLANTS	Hardwood	Unidentified	Average	Bark (Untreated Wood)	-		50.5178	5.80095	0.39839	0.0680178	0	40.354	2.86086		52.2565	6.0006	41.7429		PHYLLIS 2		0.434656	0.186307	0.0682239	0.0760101	0.156695	0.0270063	0.0511023		0.655288	0.937929	0.231781	0.846979	0.822156
	GRASS PLANTS	Grass	Wheat	-	Straw	Triticum aestivum		44.33	5.32	0.57	0.14	0.5	42.93	6.21		47.8829	5.74638	46.3707		BIOBIB		0.545627	0.233622	0.0180525	0.153491	0	0.0160367	0.0331709		0.65553	1	1	0.698193	0.769234
	WOOD PLANTS	Softwood	Spruce	-	Log	Picea abies		-	-	-	-	-	-	-		50.1	6	43.9		BIOBIB		0.463557	0.197991	0.0460944	0.186368	0.0329561	0.028262	0.0447711		0.656088	0.984585	0.777913	0.772943	0.794019
	WOOD PLANTS	Softwood	Pine	-	Bark	Pinus		52.3	5.8	0.2	0.03	0.01	38.76	2.9		53.9955	5.98802	40.0165		BIOBIB		0.404929	0.172934	0.0974477	0	0.2474	0.0233417	0.0539465		0.65611	0.900483	0	0.905012	0.84037
	WOOD PLANTS	Hardwood	Cherry tree	-	Log	Prunus avium		-	-	-	-	-	-	-		49.7	6	44.3		BIOBIB		0.472551	0.201701	0.0417621	0.196709	0.016716	0.0274018	0.0431596		0.656236	0.993225	0.879049	0.759233	0.788809
	WOOD PLANTS	Hardwood	Oak	-	Log	Quercus		-	-	-	-	-	-	-		49.5	6	44.5		BIOBIB		0.477458	0.203728	0.0395908	0.200731	0.0093492	0.0268434	0.0422997		0.65631	0.997545	0.929616	0.752378	0.786203
	WOOD PLANTS	Softwood	Sequoia	Red wood	Chips (wood)	-		52.3	5.9	0.2	0	0	40.3	1.3		53.0964	5.98985	40.9137		IEABCC		0.43402	0.185154	0.0720947	0.0066697	0.22431	0.0231309	0.0546193		0.656358	0.919806	0.0181499	0.874429	0.828965
	WASTE MATERIALS	Grass plant waste	Sweet Sorghum		Bagasse			48.0148	5.27053	1.69017	0.090009	0	39.0639	5.87059		51.9926	5.70717	42.3002		PHYLLIS 2		0.436952	0.186066	0.063186	0.0954007	0.1391	0.026915	0.0523802		0.656769	0.943782	0.298801	0.836383	0.814505
	WOOD PLANTS	Hardwood	Mixed	birch + maple	Untreated wood	-		50.491	5.94948	0.159183	0.0298469	0	42.8303	0.540162		50.8619	5.99319	43.1449		PHYLLIS 2		0.449687	0.191205	0.0523998	0.159003	0.0704686	0.0281737	0.0490621		0.657103	0.968079	0.583298	0.797905	0.8001
	WOOD PLANTS	Hardwood	Mixed	(Birch+Maple)	Chips	-		50.48	5.94	0.16	0.05	0.03	42.8	0.54		50.8768	5.9867	43.1365		BIOBIB		0.449565	0.191016	0.0522624	0.15869	0.0710904	0.0280752	0.0493005		0.657265	0.967869	0.580664	0.798081	0.799732
	WOOD PLANTS	Softwood	Douglas Fir	-	Bark	Pseudotsuga menziesii		56.2	5.9	0	0	0	36.7	1.2		56.8826	5.97166	37.1457		BIOBIB		0.264423	0.112124	0.332598	0	0.25298	0	0.0378735		0.65772	0.838199	0	1	0.869937
	WASTE MATERIALS	Wood waste	Railroad ties	-				54.06	6.05	0.43	0.11	0.05	37.86	1.44		55.1802	6.17536	38.6445		BIOBIB		0.260958	0.110373	0.219146	0.195265	0.0014372	0.0869239	0.125897		0.658293	0.998701	0.989486	0.838391	0.530333
	WOOD PLANTS	Softwood	Pine	-	Bark - Untreated Wood	Pinus		52.1944	5.67393	0.411431	0.0478409	0	37.3733	4.29914		54.8021	5.9574	39.2405		PHYLLIS 2		0.377189	0.158417	0.117803	0	0.267102	0.0210545	0.0584343		0.659871	0.883148	0	0.928672	0.838709
	WOOD PLANTS	Softwood	Sequoia	Red wood	Untreated wood	-		50.6704	5.98359	0.05003	0.030018	0	42.9057	0.360216		50.8945	6.01005	43.0955		PHYLLIS 2		0.449822	0.188867	0.0486197	0.160037	0.0734508	0.0264653	0.0527377		0.659938	0.967583	0.574432	0.795995	0.79191
	WOOD PLANTS	Softwood	Fir	Western Hemlock	Untreated Wood	Abies		50.5517	5.81745	0.100301	0.100301	0	41.2237	2.20662		51.7986	5.96095	42.2405		PHYLLIS 2		0.439927	0.183854	0.054486	0.109415	0.129844	0.0249094	0.057565		0.660982	0.947948	0.343102	0.825844	0.79963
	WOOD PLANTS	Other	Forest wood	-	Chips + whole tree	-		48.76	5.9	0.1	0.02	0	44.35	0.87		49.2476	5.95899	44.7935		BIOBIB		0.483541	0.201231	0.0310128	0.212754	0.0016009	0.0225745	0.0472864		0.661926	1	0.987842	0.73844	0.766413
	WOOD PLANTS	Hardwood	Poplar	-	Untreated wood	Populus		48.5139	5.88468	0.287299	0.0198137	0	44.2936	1.0007		49.1568	5.96266	44.8805		PHYLLIS 2		0.486725	0.202526	0.0298497	0.211977	0	0.0220764	0.0468462		0.661959	1	1	0.735355	0.765241
	WOOD PLANTS	Hardwood	Eucalyptus	-	-	Eucalyptus		48.5	5.89	0.28	0.01	0.14	44.43	0.75		49.0791	5.96033	44.9605		BIOBIB		0.490372	0.204016	0.0285993	0.209085	0	0.0214507	0.0464756		0.661989	1	1	0.732613	0.764199
	WOOD PLANTS	Hardwood	Ecoblock	Almelo - Netherlands	briquettes	-		51.4834	5.9174	0.139467	0	0	42.0295	0.430215		51.7784	5.95131	42.2703		PHYLLIS 2		0.440556	0.182979	0.0520986	0.111164	0.129622	0.0241431	0.0594378		0.66237	0.9484	0.346913	0.823816	0.795236
	WOOD PLANTS	Unidentified	Christmas trees	-	Untreated wood	-		51.59	5.58	0.52	0.4	0	36.7	5.21		54.959	5.94439	39.0966		PHYLLIS 2		0.372991	0.154776	0.115947	0	0.273707	0.0199265	0.0626534		0.662573	0.879733	0	0.931471	0.832526
	WOOD PLANTS	Hardwood	Oak	-	Untreated Wood	Quercus		49.4742	5.73068	0.44616	0.059488	0	44.031	0.258449		49.8551	5.7748	44.3701		PHYLLIS 2		0.468893	0.19413	0.0354723	0.201098	0.0249758	0.0235106	0.0519204		0.663081	0.989872	0.832364	0.758006	0.770226
	WOOD PLANTS	Hardwood	Coconut	-	Shell	Cocos		51.2677	5.87978	0.227286	0.19764	0	41.781	0.646509		51.823	5.94346	42.2335		PHYLLIS 2		0.440673	0.18198	0.0503586	0.108505	0.133742	0.0233142	0.0614268		0.663652	0.947444	0.334317	0.824102	0.791937
	WOOD PLANTS	Softwood	Fir	Hemlock	-	Tsuga heterophylla		50.4	5.8	0.1	0.1	0	41.4	2.2		51.6393	5.94262	42.418		BIOBIB		0.442117	0.182453	0.048895	0.120714	0.121347	0.0235487	0.0609252		0.663802	0.951445	0.381064	0.817675	0.789279
	WOOD PLANTS	Softwood	Sequoia	Red wood sequoia	-	Seqoia sempervirens		53.5	5.9	0.1	0.03	0.02	40.15	0.3		53.7418	5.92667	40.3315		BIOBIB		0.41919	0.172525	0.0688332	0	0.252354	0.0196282	0.0674705		0.664406	0.906106	0	0.888312	0.812501
	WOOD PLANTS	Hardwood	Eucalyptus	-	Untreated Wood	Eucalyptus camaldulensis		49.0441	5.87529	0.30027	0.010009	0	44.0096	0.760685		49.5751	5.93889	44.486		PHYLLIS 2		0.475317	0.195411	0.0312367	0.210041	0.013853	0.0218487	0.0522917		0.664649	0.996049	0.903092	0.746817	0.762135
	WOOD PLANTS	Hardwood	Hazelnut	-	Shell	Corylus		47.7915	5.78338	0.757347	0.452441	0	43.7884	1.42686		49.0858	5.93999	44.9742		PHYLLIS 2		0.489508	0.201157	0.0261133	0.213725	0	0.019821	0.0496751		0.664747	1	1	0.730271	0.756062
	WOOD PLANTS	Softwood	Sequoia	-	-	Sequoiadendron		53.5	5.9	0.1	0	0	40.3	0.2		53.661	5.91775	40.4213		BIOBIB		0.422715	0.172877	0.0636978	0	0.252033	0.0188785	0.0697984		0.665816	0.907855	0	0.884228	0.807325
	WOOD PLANTS	Hardwood	Eucalyptus	-	Untreated Wood	Eucalyptus grandis		48.3155	5.88823	0.149955	0.009997	0	45.1165	0.519844		48.6462	5.92854	45.4253		PHYLLIS 2		0.509589	0.207884	0.0184923	0.199758	0	0.0152521	0.0490247		0.666374	1	1	0.713601	0.745888
	WOOD PLANTS	Unidentified	Unidentified	Wood	-	-		51.38	5.88	0.1	0.1	0.02	42.22	0.3		51.6486	5.91074	42.4407		BIOBIB		0.443285	0.179564	0.0427747	0.121319	0.125022	0.0211158	0.0669197		0.667941	0.951291	0.374798	0.813991	0.777009
	WOOD PLANTS	Hardwood	Oak	Alabama	Wood waste	Quercus		49.5	5.7	0.2	0	0	41.3	3.3		51.2953	5.90674	42.7979		BIOBIB		0.446483	0.180686	0.040346	0.143395	0.102084	0.0213807	0.0656254		0.668154	0.958963	0.464515	0.801739	0.772139
	WOOD PLANTS	Hardwood	Cherry tree	-	-	Prunus avium		49.52	5.81	0.31	0.02	0.02	42.97	1.35		50.3764	5.91048	43.7131		BIOBIB		0.459089	0.185572	0.0336594	0.188418	0.0507706	0.0210559	0.061436		0.668411	0.978723	0.695903	0.770461	0.760466
	WOOD PLANTS	Unidentified	Mixed	Wood	Chips	-		49.49	5.82	0.19	0.05	0.02	43.18	1.25		50.2488	5.90923	43.842		BIOBIB		0.461384	0.186459	0.0326217	0.193482	0.0443872	0.0208641	0.060803		0.668459	0.981531	0.728772	0.766005	0.758772
	WOOD PLANTS	Other	Forest wood	-	Chips + bark	-		48.94	5.77	0.18	0.02	0	42.96	2.13		50.1075	5.90765	43.9848		BIOBIB		0.463991	0.187469	0.0314891	0.198569	0.0377575	0.0206188	0.0601056		0.668511	0.984555	0.76417	0.761206	0.756948
	WOOD PLANTS	Hardwood	Unidentified	Lumped hardwood	-	-		49	6	0	0.1	0	44.6	0.3		49.1968	6.0241	44.7791		BIOBIB		0.484241	0.194138	0.0224541	0.224167	0.0009651	0.0171822	0.0568526		0.670229	1	0.993007	0.728673	0.740961
	WASTE MATERIALS	Food industry waste	Grape	-	skins air dried			44.15	5.48	2.19	0	0	41.4	6.78		48.5005	6.01999	45.4795		PHYLLIS 2		0.515684	0.206501	0.013244	0.200295	0	0.0114063	0.0528693		0.670488	1	1	0.70468	0.731843
	WOOD PLANTS	Hardwood	Robinia	-	Untreated Wood	Robinia		48.7293	5.66258	1.00042	0	0	41.7069	2.90087		50.7075	5.89246	43.4		PHYLLIS 2		0.454207	0.181421	0.0328687	0.175727	0.0692631	0.0197122	0.0668012		0.671051	0.971637	0.609974	0.779087	0.756497
	WOOD PLANTS	Hardwood	Walnut	Black	Pruning	Junglans		49.8598	5.82699	0.220264	0.010012	0	43.302	0.780937		50.3692	5.88652	43.7443		PHYLLIS 2		0.459518	0.183437	0.0304159	0.190812	0.0513548	0.0193488	0.0651133		0.671176	0.978981	0.69594	0.767434	0.752068
	WOOD PLANTS	Hardwood	Walnut	Black	-	Junglans regia		49.8	5.82	0.22	0.01	0.05	43.25	0.85		50.3692	5.88652	43.7443		BIOBIB		0.459518	0.183437	0.0304159	0.190812	0.0513548	0.0193488	0.0651133		0.671176	0.978981	0.69594	0.767434	0.752068
	WOOD PLANTS	Hardwood	Oak	Tan oak	-	Quercus		47.81	5.93	0.12	0.01	0.01	44.12	2		48.8555	6.05968	45.0848		BIOBIB		0.499066	0.19872	0.0166843	0.215252	0	0.0136215	0.0566564		0.671736	1	1	0.715677	0.732399
	WOOD PLANTS	Unidentified	Unidentified	-	Bark	-		50.4	5.64	0.55	0.03	0.02	40.06	3.3		52.4454	5.86889	41.6857		BIOBIB		0.442279	0.174901	0.0378591	0.0619215	0.188	0.0163632	0.0786761		0.673251	0.934209	0.168795	0.835785	0.770585
	WOOD PLANTS	Softwood	Fir	-	Whole Tree	Picea		48.52	5.81	0.25	0.04	0	44.66	0.72		49.0151	5.86928	45.1157		BIOBIB		0.491585	0.193279	0.0163212	0.224572	0	0.0131585	0.0610842		0.674521	1	1	0.71823	0.725909
	WOOD PLANTS	Softwood	Beech	-	Chips	Fagus		48.26	5.82	0.22	0.03	0	45.06	0.61		48.6786	5.87049	45.4509		BIOBIB		0.506953	0.199283	0.0121144	0.212358	0	0.0103263	0.0589655		0.674564	1	1	0.706823	0.721787
	WOOD PLANTS	Hardwood	Apricot	-	Stone	Prunus		51.3949	6.28937	0.19998	0.09999	0	41.8158	0.19998		51.6531	6.32097	42.0259		PHYLLIS 2		0.445233	0.174797	0.03313	0.122804	0.129628	0.0170838	0.077325		0.674845	0.951395	0.368567	0.80728	0.756342
	WOOD PLANTS	Hardwood	Palm	-	Leaves	Arecaceae (Palmaceae)		47.98	5.26	1.17	0.17	0	36.61	8.81		53.4001	5.8542	40.7457		PHYLLIS 2		0.435886	0.170556	0.0393068	0	0.254317	0.0136901	0.0862438		0.675577	0.913616	0	0.865921	0.775004
	WOOD PLANTS	Softwood	Spruce	-	Whole Tree / thinning residues w/o needles	Picea abies		48.05	5.81	0.08	0.03	0	45.24	0.79		48.4864	5.86276	45.6509		BIOBIB		0.51548	0.201298	0.0087731	0.207231	0	0.0077648	0.059453		0.676015	1	1	0.698968	0.715179
	WOOD PLANTS	Hardwood	Olive	-	Residue - Pressed Cake	Olea		49.2	5.4	0.7	0.1	0.1	37.9	6.6		53.1892	5.83784	40.973		IEABCC		0.443431	0.172356	0.0332281	0	0.250235	0.0123711	0.0883786		0.677036	0.918172	0	0.857381	0.768135
	WOOD PLANTS	Hardwood	Poplar	-	Bark	Populus		47.27	5.74	0.79	0	0	45.1	1.1		48.1806	5.85058	45.9688		PHYLLIS 2		0.52949	0.20536	0.0043327	0.197731	0	0.0040566	0.0590295		0.67751	1	1	0.687	0.707007
	WOOD PLANTS	Hardwood	Mixed	(alder+poplar+willow)	-	-		47.82	5.8	0.11	0.02	0	45.54	0.71		48.2251	5.84913	45.9258		BIOBIB		0.527419	0.204497	0.0047523	0.199465	0	0.0044192	0.0594476		0.677574	1	1	0.68847	0.707354
	WOOD PLANTS	Hardwood	Almond	-	Hull	Prunus		46.4873	5.44162	0.974619	0.0101523	0	41.2183	5.86802		49.9074	5.84196	44.2507		PHYLLIS 2		0.468278	0.181005	0.0199533	0.213025	0.0314756	0.0141944	0.0720695		0.67825	0.98902	0.806015	0.744956	0.725409
	WASTE MATERIALS	Wood waste	Particle Board	s.pine coarse				53.51	5.92	3.5	0.08	0.12	35.92	0.95		56.1196	6.2087	37.6717		BIOBIB		0.229024	0.0880251	0.254795	0.200928	0.0015645	0.0942323	0.131431		0.679486	0.99864	0.989057	0.847659	0.526846
	WOOD PLANTS	Hardwood	Willow	-	-	Salix		47.66	5.72	0.43	0.03	0.01	44.7	1.45		48.593	5.83197	45.575		BIOBIB		0.510425	0.19561	0.0067697	0.215837	0	0.0060087	0.0653489		0.68012	1	1	0.698369	0.704081
	WOOD PLANTS	Softwood	Spruce	-	Chips	Picea abies		49.53	5.77	0.19	0.01	0.01	44.01	0.48		49.8741	5.81009	44.3158		BIOBIB		0.469199	0.177927	0.0157552	0.217146	0.0307531	0.0115179	0.0777013		0.682407	0.989946	0.81239	0.739558	0.712488
	WOOD PLANTS	Hardwood	Vine	-	Shoot	-		48.15	5.61	0.81	0	0	42.84	2.59		49.8447	5.80745	44.3478		PHYLLIS 2		0.469775	0.178137	0.0155741	0.218197	0.0293753	0.0114389	0.0775026		0.682419	0.990594	0.819976	0.73853	0.712097
	GRASS PLANTS	Grass	Flax	-	Shive	Linum		50.295	6.09939	0.59994	0.069993	0	41.1259	1.80982		51.5739	6.25449	42.1716		PHYLLIS 2		0.447741	0.169266	0.022468	0.128934	0.129219	0.0123586	0.0900138		0.683077	0.953134	0.380086	0.79674	0.730806
	WOOD PLANTS	Hardwood	Almond	-	Pruning	Prunus		50.3	5.61731	0.639448	0.00983767	0	41.7117	1.72172		51.5216	5.75373	42.7247		PHYLLIS 2		0.448047	0.169368	0.0223143	0.132372	0.125773	0.0123902	0.0897357		0.683095	0.954215	0.392729	0.795026	0.730154
	WOOD PLANTS	Hardwood	Eucalyptus	Saligna	-	Eucalyptus		-	-	-	-	-	-	-		50.6139	6.05074	43.3354		NREL		0.457125	0.17253	0.0185833	0.186061	0.0691792	0.0121246	0.0843968		0.683432	0.973873	0.622836	0.763831	0.718299
	WOOD PLANTS	Hardwood	Almond	-	Shell	Prunus		48.8488	5.50551	0.800801	0	0	40.9409	3.9039		51.2605	5.77731	42.9622		IEABCC		0.450551	0.168011	0.0182168	0.150156	0.109436	0.0107964	0.0928326		0.686035	0.959984	0.457206	0.783175	0.718194
	WOOD PLANTS	Unidentified	Unidentified	-	Leaves (Withered)	-		29.3825	3.24309	1.00312	0.146085	0	23.5976	42.6276		52.2605	5.76823	41.9712		PHYLLIS 2		0.446982	0.1659	0.0183891	0.0758902	0.182739	0.0090741	0.101026		0.687045	0.938405	0.203121	0.816109	0.727087
	WOOD PLANTS	Hardwood	Hazelnut	-	Shell	Corylus avellana		52.9	5.6	1.4	0	0	38.7	1.4		54.4239	5.76132	39.8148		BIOBIB		0.404906	0.149934	0.0378784	0	0.285968	0.010893	0.11042		0.687545	0.891651	0	0.889067	0.751399
	WOOD PLANTS	Hardwood	Walnut	-	-	Junglans regia		49.98	5.71	0.21	0.01	0.03	43.35	0.71		50.4645	5.76535	43.7702		BIOBIB		0.459734	0.170104	0.013648	0.195111	0.0621239	0.0093426	0.0899365		0.687712	0.977285	0.658231	0.754412	0.703639
	WOOD PLANTS	Hardwood	Oak	Chinkapin	Untreated wood	Quercus		49.6701	5.92881	0.069986	0.009998	0	44.0212	0.29994		49.8595	5.95143	44.1891		PHYLLIS 2		0.469598	0.173574	0.0107047	0.220589	0.0317103	0.0080572	0.0857673		0.687934	0.990245	0.809934	0.733846	0.695824
	WOOD PLANTS	Softwood	Spruce	-	-	Picea abies		51.06	5.75	0.11	0.01	0.01	42.29	0.77		51.5237	5.80222	42.6741		BIOBIB		0.449518	0.164558	0.0144555	0.13268	0.129169	0.008359	0.101261		0.69	0.954318	0.386498	0.788314	0.709485
	WOOD PLANTS	Hardwood	Cotton	-	Waste (gin)	Gossypium		45.9681	5.34864	0.839557	0.377329	0	41.9873	5.47904		49.267	5.73248	45.0005		PHYLLIS 2		0.481742	0.17334	0.0031086	0.242516	0.0071288	0.0026315	0.0895326		0.693676	1	0.954125	0.708255	0.671604
	WOOD PLANTS	Hardwood	Oak	-	Bark - Untreated Wood	Quercus		49.7601	5.39841	0.151534	0.0947089	0	39.2947	5.30053		52.6822	5.71543	41.6023		PHYLLIS 2		0.45026	0.161922	0.0092567	0.0361343	0.221897	0.0043779	0.116152		0.693794	0.929437	0.0906981	0.823794	0.71189
	WOOD PLANTS	Hardwood	Cherry tree	Laurel	Leaves	Prunus		46.93	5.97	1.11	0.07	0	39.29	6.63		50.9057	6.47576	42.6185		PHYLLIS 2		0.455102	0.163218	0.008741	0.172753	0.0903104	0.0057644	0.104111		0.694372	0.967774	0.539536	0.763034	0.689006
	WOOD PLANTS	Hardwood	Walnut	English	Pruning	Junglans		49.7449	5.63282	0.370185	0.010005	0	43.1616	1.08054		50.4823	5.71632	43.8014		PHYLLIS 2		0.460136	0.16484	0.0073153	0.19592	0.0654698	0.0051735	0.101145		0.694608	0.976957	0.646944	0.748386	0.683233
	WOOD PLANTS	Hardwood	Walnut	English	-	Junglans regia		49.72	5.63	0.37	0.01	0.06	43.14	1.07		50.4823	5.71632	43.8014		BIOBIB		0.460136	0.16484	0.0073153	0.19592	0.0654698	0.0051735	0.101145		0.694608	0.976957	0.646944	0.748386	0.683233
	WASTE MATERIALS	Wood waste	Particle Board	s.pine medium				55.01	5.65	3.16	0.03	0.18	35.58	0.39		57.1592	5.87074	36.9701		BIOBIB		0.152202	0.0524109	0.22136	0.298024	0.0023677	0.0754982	0.198137		0.702932	0.997967	0.988601	0.857907	0.522909
	WOOD PLANTS	Hardwood	Kukui	-	Shell (nuts)	Aleurites moluccanus		55.1152	5.53524	0.336068	0.0296531	0	37.5507	1.43323		56.1248	5.63664	38.2386		PHYLLIS 2		0.348152	0.119523	0.0469588	0	0.330422	0.0083667	0.146577		0.703566	0.855298	0	0.930966	0.723633
	WASTE MATERIALS	Wood waste	Telephone poles	-				55.65	6.02	0.44	0.56	0.41	34.51	2.41		57.8603	6.2591	35.8806		BIOBIB		0.163225	0.0520516	0.327812	0.20914	0.0018066	0.105463	0.140502		0.718716	0.998517	0.988263	0.864814	0.520391
	WASTE MATERIALS	Other waste	Paper/wood	-	chips			54.5545	6.33663	0.29703	0.0990099	0.792079	32.7723	5.14851		58.2452	6.76533	34.9894		IEABCC		0.200067	0.0610987	0.453003	0.0859979	0.0008234	0.140918	0.058092		0.72738	0.999299	0.988062	0.86861	0.519072
	WASTE MATERIALS	Other waste	Paper/sludge/wood	-	chips			46.7726	5.66038	1.09235	0.0993049	0.695134	27.1102	18.57		58.8015	7.1161	34.0824		IEABCC		0.212499	0.0608632	0.556876	0.0028566	8.67e-05	0.164873	0.0019456		0.739912	0.999802	0.987792	0.874095	0.517082
	WASTE MATERIALS	Paper industry waste	Rejects from waste paper preparation	-				55.1	6.37	0.31	0.07	0.76	32.19	5.2		58.8298	6.8012	34.369		BIOBIB		0.177287	0.0506001	0.487336	0.0832315	0.0008366	0.143979	0.0567296		0.740587	0.99928	0.987794	0.874386	0.516902
	WASTE MATERIALS	Food industry waste	Grape	-	Pomace			53.7653	5.86868	1.96861	0.120717	0	31.4606	6.81614		59.0214	6.44241	34.5362		PHYLLIS 2		0.130443	0.0364052	0.415994	0.174971	0.0016562	0.120889	0.119641		0.74487	0.998674	0.987726	0.876254	0.516119
	WOOD PLANTS	Hardwood	Leucaena	-	Chips (Untreated Wood)	Leucaena leucocephala		47.8856	5.83825	0.409877	0.079976	0	43.287	2.49925		49.3611	6.01814	44.6208		PHYLLIS 2		0.481273	0.207833	0.0411149	0.198841	0.0040828	0.0281248	0.0387298		0.653601	0.750263	0.967506	0.792647	1
	WASTE MATERIALS	Paper industry waste	Black Liquor	alkaline straw pulping				45.8592	4.4909	1.29026	0.55011	0	25.8052	22.0044		60.218	5.89703	33.8849		PHYLLIS 2		0.0150846	0.0036316	0.345435	0.32011	0.0030159	0.0896765	0.223046		0.771922	0.997658	0.987208	0.888076	0.511544
	ALGAE	Algae	Monodus	-	lipids extract	Monodus subterraneus		67.6692	10.1754	2.15539	0.280702	0	16.8922	2.82707		71.4286	10.7407	17.8307		PHYLLIS 2		Outsider
	WASTE MATERIALS	Paper industry waste	Sewage sludge	From waste paper production				44.6	5.1	0.71	0.18	0.72	15.99	32.7		67.8947	7.76374	24.3416		BIOBIB		Outsider
	WASTE MATERIALS	Other waste	Paper/sludge	-				44.334	5.06958	0.695825	0.198807	0.695825	16.501	32.505		67.27	7.69231	25.0377		IEABCC		Outsider
	ALGAE	Algae	Monodus	-	-	Monodus subterraneus		52.6718	7.65394	7.96947	0.508906	0	24.6819	6.51399		61.9612	9.00383	29.035		PHYLLIS 2		Outsider
	WASTE MATERIALS	Paper industry waste	Paper waste "rofire"	-				52.5394	7.62336	0.309055	0.0721129	0	32.1418	7.31431		56.9196	8.25893	34.8214		PHYLLIS 2		Outsider
	WASTE MATERIALS	Other waste	Sewage sludge	-				28.2717	4.0959	2.997	1.2987	0.0999001	17.4825	45.7542		56.7134	8.21643	35.0701		IEABCC		Outsider
	WASTE MATERIALS	Other waste	Sewage sludge	-				28.3	4.07	2.96	1.25	0.07	17.55	45.8		56.6907	8.15304	35.1563		BIOBIB		Outsider
	WASTE MATERIALS	Other waste	Cartoon-Plastic-Aluminium packing	-				54	7.79	0.16	0.08	0.06	34.41	3.5		56.1331	8.09771	35.7692		BIOBIB		Outsider
	WASTE MATERIALS	Other waste	Paper	-				53.8922	7.78443	0.199601	0.0998004	0.0998004	34.4311	3.49301		56.0748	8.09969	35.8255		IEABCC		Outsider
	WOOD PLANTS	Hardwood	Cocoa	-	-	Theobroma		47.833	7.1881	2.90968	0.126902	0	32.5595	9.38281		54.616	8.20741	37.1766		PHYLLIS 2		Outsider
	WOOD PLANTS	Hardwood	Cocoa	-	Beans	Theobroma		48.6377	6.96266	3.12815	0.201816	0	33.8042	7.26539		54.4018	7.78781	37.8104		IEABCC		Outsider
	GRASS PLANTS	Grass	Sunflower	-	Pellets	Helianthus		46.8853	6.70933	5.9794	0.289971	0	33.3167	6.81932		53.9462	7.71974	38.3341		PHYLLIS 2		Outsider
	WASTE MATERIALS	Other waste	Other	skin residues (tannery waste)				47.6842	5.68421	7.36842	1.68421	0	36.8421	0.736842		52.8588	6.30105	40.8401		PHYLLIS 2		Outsider
	WASTE MATERIALS	Other waste	Waste Papers	-				47.94	6.79	0.38	0.1	0.04	36.75	8		52.4049	7.42239	40.1727		BIOBIB		Outsider
	GRASS PLANTS	Grass	Sunflower	-	Husk	Helianthus		50.42	4.91	0.59	0	0	42.18	1.9		51.7075	5.03538	43.2571		PHYLLIS 2		Outsider
	WASTE MATERIALS	Other waste	Organic waste	Sewage Sludge				25	4.6	3.4	1	0	18.9	47.1		51.5464	9.48454	38.9691		IEABCC		Outsider
	ALGAE	Algae	Microalgae	Spirulina				43.94	6.86	6.54	0.43	0	34.53	7.7		51.4942	8.03938	40.4664		PHYLLIS 2		Outsider
	WASTE MATERIALS	Food industry waste	Apple	-	Pulp			49.2253	8.37306	0.963449	0.0496623	0	38.6075	2.78109		51.1666	8.70328	40.1301		PHYLLIS 2		Outsider
	WOOD PLANTS	Hardwood	Cotton	-	Husk	Gossypium		48.7851	8.12919	1.35986	0	0	38.5261	3.19968		51.1158	8.51755	40.3667		PHYLLIS 2		Outsider
	GRASS PLANTS	Grass	Tobacco	Bright water extracted	-	Nicotiana		45.6	6.9	2.4	0	0	37.7	7.4		50.5543	7.64967	41.796		PHYLLIS 2		Outsider
	GRASS PLANTS	Vegetables	Pepper plant	-	-	-		39.2739	4.17042	3.28033	0.40004	0	35.0135	17.8618		50.0574	5.31549	44.6272		PHYLLIS 2		Outsider
	GRASS PLANTS	Grass	Miscanthus	St.Florian Austria	-	Miscanthus		48.6	5.1	0.2	0.04	0.1	43.96	2		49.7645	5.2222	45.0133		BIOBIB		Outsider
	GRASS PLANTS	Grass	Reed	common reed (cannucia di palude)	-	Phragmitis Australis		46.8046	7.50891	0.847013	0.09517	0	39.9143	4.83		49.6718	7.96889	42.3594		PHYLLIS 2		Outsider
	WOOD PLANTS	Hardwood	Lupine	-	-	Lupinus		41.22	4.39	1.25	0.33	0.57	37.5	14.74		49.5969	5.28216	45.1209		BIOBIB		Outsider
	GRASS PLANTS	Grass	Lupine (tremoço)	-	Whole crop	Lupinus		41.2	4.4	1.3	0.3	0.6	37.5	14.7		49.5788	5.29483	45.1264		IEABCC		Outsider
	WASTE MATERIALS	Food industry waste	Palm oil		Shell (kernel)			46.68	5.86	1.01	0.06	0	42.01	4.38		49.3707	6.19778	44.4315		PHYLLIS 2		Outsider
	WOOD PLANTS	Hardwood	Rockrose (rosewood)	-	Untreated wood	Cistus		48.4	5.26	0.28	0	0	44.49	1.57		49.3123	5.35914	45.3286		PHYLLIS 2		Outsider
	GRASS PLANTS	Grass	Flax	-	-	Linum usitatissimum		46.6	5	0.6	0.16	0.32	42.92	4.4		49.3017	5.28989	45.4084		BIOBIB		Outsider
	WOOD PLANTS	Hardwood	Pistachio	-	Shell	Pistacia vera		47.66	4.55	0.57	0.18	0.01	45.79	1.24		48.6327	4.64286	46.7245		BIOBIB		Outsider
	GRASS PLANTS	Vegetables	Tomato plant	-	-	Solanum lycopersicum		38.17	4.08	2.3	0.5	0	36.24	18.71		48.6304	5.19811	46.1715		PHYLLIS 2		Outsider
	GRASS PLANTS	Grass	Miscanthus	Hai-W-ex - Wolfsthal Austria	-	Miscanthus		44.8	5	1.6	0.13	0.24	42.53	5.7		48.5216	5.41536	46.063		BIOBIB		Outsider
	GRASS PLANTS	Grass	Miscanthus	Almo N3 - Gross-Ezerdorf Austria	-	Miscanthus		45.2	5	1.6	0.12	0.25	43.13	4.7		48.4303	5.35733	46.2124		BIOBIB		Outsider
	GRASS PLANTS	Grass	Miscanthus	Capo N3 - Gross-Ezerdorf Austria	-	Miscanthus		45.4	4.8	1.3	0.12	0.24	43.64	4.5		48.3802	5.11509	46.5047		BIOBIB		Outsider
	GRASS PLANTS	Grass	Amaranth	-	Whole crop	Amaranthus		40.8591	4.6953	1.6983	0.2997	0.599401	38.961	12.8871		48.3452	5.55556	46.0993		IEABCC		Outsider
	GRASS PLANTS	Grass	Miscanthus	Atzenbrugg-Gulle Austria	-	Miscanthus		-	-	-	-	-	-	-		48.3286	5.13492	46.5364		BIOBIB		Outsider
	GRASS PLANTS	Grass	Miscanthus	Markgrafneus Austria	-	Miscanthus		-	-	-	-	-	-	-		48.3189	5.13388	46.5472		BIOBIB		Outsider
	GRASS PLANTS	Grass	Hemp (canhamo)	-	-	Cannabis sativa		45.12	5.14	0.85	0.08	0.22	43.21	5.38		48.2722	5.49909	46.2287		BIOBIB		Outsider
	GRASS PLANTS	Grass	Bamboo	-	Dust	Bambuseae		43.86	6.64	0	0	0	40.4	9.1		48.2508	7.30473	44.4444		PHYLLIS 2		Outsider
	GRASS PLANTS	Grass	Miscanthus	Capo-W-ex - Wolfsthal Austria	-	Miscanthus		44.7	5	1.8	0.12	0.18	43.2	5		48.1163	5.38213	46.5016		BIOBIB		Outsider
	WOOD PLANTS	Hardwood	Gliricidia	-	Untreated wood	Gliricidia Sepium		47.0848	7.01262	0.801443	0.0200361	0	44.0793	1.0018		47.9592	7.14286	44.898		PHYLLIS 2		Outsider
	GRASS PLANTS	Grass	Miscanthus	Steinbrunn Austria	-	Miscanthus		-	-	-	-	-	-	-		47.9493	5.02614	47.0245		BIOBIB		Outsider
	GRASS PLANTS	Grass	Clover grass	-	-	Trifolium		44.9539	6.80817	2.20264	0.30036	0	42.2006	3.53424		47.8423	7.2456	44.9121		PHYLLIS 2		Outsider
	GRASS PLANTS	Grass	Miscanthus	Almo-W-ex - Wolfsthal Austria	-	Miscanthus		44.5	5	1.3	0.11	0.14	43.55	5.4		47.8238	5.37346	46.8028		BIOBIB		Outsider
	GRASS PLANTS	Grass	Miscanthus	Haiduck-W-ex - Wolfsthal Austria	-	Miscanthus		43.8	4.9	1.6	0.12	0.06	43.12	6.4		47.702	5.33653	46.9614		BIOBIB		Outsider
	WASTE MATERIALS	Grass plant waste	Pepper					42.3581	2.96267	3.15284	0.560504	0	43.5592	7.40667		47.6577	3.33333	49.009		PHYLLIS 2		Outsider
	GRASS PLANTS	Grass	Rye	-	Whole crop	Secale		44.6746	5.12821	0.788955	0.0986193	0.197239	44.0828	5.02959		47.584	5.46218	46.9538		IEABCC		Outsider
	WASTE MATERIALS	Food industry waste	Litchi	-	Peel			45.1	6.63	0.96	0.06	0	43.06	4.19		47.5789	6.99441	45.4267		PHYLLIS 2		Outsider
	GRASS PLANTS	Grass	Miscanthus	renan N3 - Gross-Ezerdorf Austria	-	Miscanthus		-	-	-	-	-	-	-		47.4931	5.18662	47.3202		BIOBIB		Outsider
	WOOD PLANTS	Hardwood	Catalpa	-	Untreated wood	Catalpa		47.08	6.54	0.08	0	0	45.55	0.75		47.474	6.59474	45.9312		PHYLLIS 2		Outsider
	GRASS PLANTS	Grass	Meadow	-	-	-		42.2366	4.80591	1.84843	0.184843	0.739372	42.2366	7.94824		47.3085	5.38302	47.3085		IEABCC		Outsider
	GRASS PLANTS	Grass	Miscanthus	presto N1 - Gross-Ezerdorf Austria	-	Miscanthus		-	-	-	-	-	-	-		47.1976	5.49283	47.3095		BIOBIB		Outsider
	GRASS PLANTS	Grass	Tobacco	-	Burley	Nicotiana		36.6994	5.78163	4.54624	0	0	35.6369	17.3359		46.9794	7.40116	45.6194		PHYLLIS 2		Outsider
	GRASS PLANTS	Grass	Miscanthus	Typo N3 - Gross-Ezerdorf Austria	-	Miscanthus		-	-	-	-	-	-	-		46.9455	5.53506	47.5195		BIOBIB		Outsider
	GRASS PLANTS	Grass	Miscanthus	typo N1 - Gross-Ezerdorf Austria	-	Miscanthus		-	-	-	-	-	-	-		46.8878	5.52826	47.5839		BIOBIB		Outsider
	GRASS PLANTS	Grass	Thistle	-	-	Asteraceae		42.0911	5.86192	0.959061	0.134448	0	41.885	9.06851		46.8522	6.52499	46.6228		PHYLLIS 2		Outsider
	GRASS PLANTS	Grass	Miscanthus	Capo N1 - Gross-Ezerdorf Austria	-	Miscanthus		-	-	-	-	-	-	-		46.783	5.07408	48.1429		BIOBIB		Outsider
	GRASS PLANTS	Grass	Miscanthus	Indos N1 - Gross-Ezerdorf Austria	-	Miscanthus		-	-	-	-	-	-	-		46.783	5.07408	48.1429		BIOBIB		Outsider
	WOOD PLANTS	Hardwood	Peanut	-	Shell (groundnut)	Arachis hypogaea		44.0912	5.23808	0.931637	0.019013	0	45.0323	4.68781		46.7258	5.55108	47.7232		PHYLLIS 2		Outsider
	WOOD PLANTS	Hardwood	Lemon	-	Pellets	Citrus		44.48	6.47	0.87	0	0	44.33	3.85		46.6835	6.79051	46.526		PHYLLIS 2		Outsider
	GRASS PLANTS	Grass	Miscanthus	renan N1 - Gross-Ezerdorf Austria	-	Miscanthus		-	-	-	-	-	-	-		46.6179	5.17977	48.2023		BIOBIB		Outsider
	GRASS PLANTS	Grass	Miscanthus	Almo N1 - Gross-Ezerdorf Austria	-	Miscanthus		-	-	-	-	-	-	-		46.5946	5.19984	48.2055		BIOBIB		Outsider
	WASTE MATERIALS	Food industry waste	Longan	-	Peel			42.7	6.94	1.04	0.1	0	42.12	7.1		46.5344	7.56321	45.9024		PHYLLIS 2		Outsider
	GRASS PLANTS	Grass	Corn	-	Shoots	Zea mays		-	-	-	-	-	-	-		46.2845	6.58174	47.1338		PHYLLIS 2		Outsider
	GRASS PLANTS	Grass	Mustard	-	Husk	Brassicaceae		44.0489	8.7899	0.377846	0.188923	0	42.7165	3.8779		46.0978	9.19875	44.7034		PHYLLIS 2		Outsider
	GRASS PLANTS	Grass	Triticale	Winter	Whole crop	Poaceae Triticeae		43.0569	5.19481	0.799201	0.1998	0.1998	45.1548	5.39461		46.0963	5.5615	48.3422		IEABCC		Outsider
	WASTE MATERIALS	Paper industry waste	paper sludge	paper residue sludge				27.231	3.47241	0.791954	0.49954	0	28.3824	39.6226		46.0872	5.87689	48.0359		PHYLLIS 2		Outsider
	GRASS PLANTS	Grass	Miscanthus	Almo in 94 - Wolfsthal Austria Grain	-	Miscanthus		-	-	-	-	-	-	-		46.0392	5.20621	48.7546		BIOBIB		Outsider
	WOOD PLANTS	Hardwood	Cotton	-	-	Gossypium		39.53	5.1	1.22	0.49	0	41.54	12.12		45.8744	5.91853	48.207		BIOBIB		Outsider
	GRASS PLANTS	Grass	Soya	-	Bean husk	Glycine		43.0843	6.36064	0.850085	0.090009	0	44.5145	5.10051		45.8542	6.76956	47.3763		PHYLLIS 2		Outsider
	WASTE MATERIALS	Food industry waste	Mango		Seeds			43.8	6.79	1.13	0.09	0	45.18	3.01		45.7346	7.0899	47.1755		PHYLLIS 2		Outsider
	GRASS PLANTS	Grass	Miscanthus	Capo-W-in - Wolfsthal Austria	-	Miscanthus		-	-	-	-	-	-	-		45.7096	5.30558	48.9848		BIOBIB		Outsider
	GRASS PLANTS	Grass	Barley	-	Straw	Hordeum vulgare		42.88	5.53	0.56	0.25	0.35	45.48	4.95		45.6705	5.88987	48.4397		BIOBIB		Outsider
	WASTE MATERIALS	Food industry waste	Palm oil empty fruit bunch		pith			41.61	5.92	0.23	0.98	0	43.72	7.54		45.6	6.48767	47.9123		PHYLLIS 2		Outsider
	GRASS PLANTS	Grass	Miscanthus	Almo ex 94 - Wolfsthal Austria Grain	-	Miscanthus		-	-	-	-	-	-	-		45.584	5.18926	49.2267		BIOBIB		Outsider
	GRASS PLANTS	Grass	Corn	-	Sillage	Zea mays		43.4434	6.17618	1.02102	0.930931	0	45.8859	2.54254		45.4879	6.46683	48.0453		PHYLLIS 2		Outsider
	GRASS PLANTS	Grass	Miscanthus	Almo in 94 - Wolfsthal Austria Straw	-	Miscanthus		-	-	-	-	-	-	-		45.4317	5.1375	49.4308		BIOBIB		Outsider
	WOOD PLANTS	Hardwood	Poplar	hybrid	Chips (wood)	Populus		44	5.5	1	0	0	47.7	1.8		45.2675	5.65844	49.0741		PHYLLIS 2		Outsider
	WASTE MATERIALS	Food industry waste	Litchi	-	Seeds			43.6	6.86	1.14	0.08	0	45.94	2.38		45.2282	7.11618	47.6556		PHYLLIS 2		Outsider
	WASTE MATERIALS	Food industry waste	Longan	-	Seeds			43.1	6.85	1.18	0.08	0	45.46	3.33		45.1735	7.17954	47.647		PHYLLIS 2		Outsider
	GRASS PLANTS	Grass	Miscanthus	Hai-W-in - Wolfsthal Austria	-	Miscanthus		-	-	-	-	-	-	-		45.1672	5.30179	49.531		BIOBIB		Outsider
	GRASS PLANTS	Grass	Miscanthus	Almo ex 94 - Wolfsthal Austria Straw	-	Miscanthus		-	-	-	-	-	-	-		45.1333	5.14943	49.7173		BIOBIB		Outsider
	GRASS PLANTS	Grass	Miscanthus	Almo-W-in - Wolfsthal Austria	-	Miscanthus		-	-	-	-	-	-	-		44.9862	5.3045	49.7093		BIOBIB		Outsider
	WASTE MATERIALS	Food industry waste	Soybean		Oil cake			38.8	5.74	6.64	0	0	41.86	6.96		44.9074	6.64352	48.4491		PHYLLIS 2		Outsider
	WASTE MATERIALS	Paper industry waste	Black Liquor	Kraft black liquor				34.2685	4.10822	0.200401	4.00802	0	38.0762	19.3387		44.8231	5.37353	49.8034		PHYLLIS 2		Outsider
	WASTE MATERIALS	Paper industry waste	Black Liquor	Kraft black liquor from spruce wood				34.2685	4.10822	0.200401	4.00802	0	38.0762	19.3387		44.8231	5.37353	49.8034		PHYLLIS 2		Outsider
	GRASS PLANTS	Grass	Rape (Canola-colza)	-	Residues	Brassica		42.76	5.31	0.56	0	0	47.42	3.95		44.7796	5.56079	49.6597		PHYLLIS 2		Outsider
	GRASS PLANTS	Grass	Miscanthus	Haiduck-W-in - Wolfsthal Austria	-	Miscanthus		-	-	-	-	-	-	-		44.7425	5.22166	50.0358		BIOBIB		Outsider
	GRASS PLANTS	Grass	Miscanthus	-	Grass	Miscanthus		40.004	5.09599	1.07548	0.0502563	0	44.4266	9.34767		44.684	5.69215	49.6239		PHYLLIS 2		Outsider
	GRASS PLANTS	Grass	Safflower	-	Straw	Carthamus		42.0888	5.59031	0.625631	0	0	47.003	4.69223		44.4527	5.9043	49.643		PHYLLIS 2		Outsider
	GRASS PLANTS	Grass	Tobacco	oriental	-	Nicotiana		38.7	5.9	2	0	0	43.1	10.3		44.1277	6.72748	49.1448		PHYLLIS 2		Outsider
	WASTE MATERIALS	Paper industry waste	paper sludge	paper sludge				25.0451	3.28498	0.218233	0.195261	0	28.5311	42.7254		44.0461	5.77719	50.1767		PHYLLIS 2		Outsider
	WASTE MATERIALS	Grass plant waste	Garlic	-				36.4925	4.79175	0.472426	0.21211	0	41.5735	16.4578		44.0424	5.7831	50.1745		PHYLLIS 2		Outsider
	WASTE MATERIALS	Food industry waste	Mango		Peel			41.6	7.04	0.91	0.08	0	46	4.37		43.956	7.43872	48.6052		PHYLLIS 2		Outsider
	WASTE MATERIALS	Grass plant waste	Sorghum		Bagasse			39.6982	7.55533	1.10664	0.221328	0	43.2596	8.15895		43.8591	8.34723	47.7937		PHYLLIS 2		Outsider
	GRASS PLANTS	Other	Flaw	-	Straw	-		41.69	6	0.66	0.09	0	48.3	3.26		43.4316	6.25065	50.3177		PHYLLIS 2		Outsider
	GRASS PLANTS	Grass	SugarCane	-	Leaves	Saccharum spp		39.75	5.5	0.19	0	0	46.84	7.72		43.1643	5.97242	50.8633		PHYLLIS 2		Outsider
	GRASS PLANTS	Grass	Switchgrass	Dakota	-	Panicum virgatum		41.45	5.02	0.65	0.07	0.03	49.63	3.15		43.1322	5.22373	51.6441		BIOBIB		Outsider
	GRASS PLANTS	Grass	Timothy grass	-	-	Poaceae		41.9058	5.92941	1.0199	0.149985	0	49.835	1.15988		42.9054	6.07084	51.0238		PHYLLIS 2		Outsider
	WASTE MATERIALS	Grass plant waste	Corn Shelled	-	Grain / Meal			41.7417	6.40641	1.1011	0.1001	0	49.2492	1.4014		42.8571	6.5776	50.5653		PHYLLIS 2		Outsider
	GRASS PLANTS	Grass	Switchgrass	Summer	-	Panicum virgatum		41.21	5.03	0.31	0.04	0.01	51.07	2.33		42.3492	5.16905	52.4818		BIOBIB		Outsider
	GRASS PLANTS	Grass	Wheat	-	Stem	Triticum aestivum		39.07	4.77	0.58	0.08	0.37	50.17	4.96		41.5594	5.07393	53.3667		BIOBIB		Outsider
	WASTE MATERIALS	Paper industry waste	Black Liquor	Black liquor				25.4007	4.56542	0.105763	4.4244	0	32.8452	32.6586		40.4397	7.26848	52.2919		PHYLLIS 2		Outsider
	GRASS PLANTS	Grass	Rape (Canola-colza)	-	-	Brassica napus		37.82	4.61	0.76	0	0.04	53.22	3.55		39.54	4.81965	55.6404		BIOBIB		Outsider
	GRASS PLANTS	Vegetables	Arhar (pidgeon pea)	-	Stalk	Cajanus cajan		38.05	6.15	1.01	0	0	53.78	1.01		38.8345	6.27679	54.8888		PHYLLIS 2		Outsider
	GRASS PLANTS	Grass	Rape (Canola-colza)	-	Straw	Brassica napus		33.73	3.85	0.67	0	0.06	58.39	3.3		35.1464	4.01167	60.8419		BIOBIB		Outsider
	WASTE MATERIALS	Wood waste	driftwood					-	-	-	-	-	-	-		30.5589	3.61882	65.8223		BIOBIB		Outsider
	WOOD PLANTS	Hardwood	Coconut	-	Coir	Cocos		15.94	2.25	0.5	0	0	63.5	17.81		19.5128	2.75432	77.7329		PHYLLIS 2		Outsider

## Sheet: Elem + Bioch composition
	Extractives extend the applicability of multistep kinetic scheme of biomass pyrolysis
	Paulo Eduardo Amaral Debiagi, Chiara Pecchi, Giancarlo Gentile, Alessio Frassoldati, Alberto Cuoci, Tiziano Faravelli, Eliseo Ranzi
	Supplemental Material
	Elemental and Biochemical Exp. Data Available
	Samples Description								Experimental				Experimental					Calculated
		Sample	Variety / ID	Category	Subcategory	Organ	Source		C	H	O		Cellulose	Hemicellulose	Lignin	Extractives		CELL	HCELL	LIGH	LIGC	LIGO	TRIL	CTANN
	26	Corn	Zea mays	Grass Plants	Cereal	Stover	NREL		0.50251	0.0584339	0.439056		0.4054	0.2602	0.2072	0.1272		0.39876	0.254921	0.000977	0.0440106	0.183192	0.0231629	0.0949764
	27	Corn	Zea mays	Grass Plants	Cereal	Stover	NREL		0.50178	0.0627764	0.435444		0.4187	0.2693	0.2077	0.1043		0.406922	0.304172	0.0108484	0.0258302	0.155814	0.0723601	0.024054
	28	Corn	Zea mays	Grass Plants	Cereal	Stover	NREL		0.507944	0.0596867	0.43237		0.3672	0.2295	0.2182	0.185		0.390573	0.256402	0.0027896	0.0571684	0.181233	0.0403013	0.0715328
	29	Corn	Zea mays	Grass Plants	Cereal	Stover	NREL		0.503069	0.0592353	0.437695		0.4236	0.272	0.206	0.0983		0.398691	0.261594	0.0018554	0.0434434	0.182832	0.0321977	0.0793854
	30	Corn	Zea mays	Grass Plants	Cereal	Stover	NREL		0.508692	0.0629474	0.42836		0.4231	0.2645	0.2231	0.0893		0.393354	0.28798	0.01199	0.0442604	0.162254	0.077375	0.0227856
	31	Corn	Zea mays	Grass Plants	Cereal	Stover	NREL		0.50332	0.0610409	0.435639		0.4234	0.2671	0.2033	0.1062		0.4008	0.279904	0.0051882	0.0376239	0.175664	0.0525291	0.0482905
	33	Corn	Zea mays	Grass Plants	Cereal	Stover	NREL		0.498223	0.0597738	0.442003		0.4023	0.272	0.2327	0.093		0.409287	0.279061	0.0024653	0.0279709	0.179153	0.0357384	0.0663242
	34	Corn	Zea mays	Grass Plants	Cereal	Stover	NREL		0.521022	0.0642841	0.414694		0.4033	0.2577	0.2497	0.0893		0.373887	0.275228	0.0206095	0.078147	0.149498	0.0988593	0.0037716
	35	Corn	Zea mays	Grass Plants	Cereal	Stover	NREL		0.528622	0.0641788	0.407199		0.4148	0.2768	0.2233	0.0851		0.363926	0.259914	0.0204159	0.114607	0.142239	0.0988969	0
	36	Corn	Zea mays	Grass Plants	Cereal	Stover	NREL		0.515777	0.0605693	0.423654		0.4285	0.2632	0.2275	0.0808		0.378885	0.249611	0.0049012	0.0829088	0.173939	0.0535674	0.0561872
	37	Corn	Zea mays	Grass Plants	Cereal	Stover	NREL		0.499575	0.0601616	0.440264		0.418	0.2805	0.2062	0.0954		0.407129	0.280102	0.0032058	0.030202	0.178151	0.0410256	0.0601855
	101	Wheat	Thunderbird	Grass Plants	Cereal	Straw	NREL		0.49926	0.0598475	0.440892		0.3738	0.2592	0.193	0.174		0.407032	0.276445	0.0025256	0.0308076	0.179906	0.0364658	0.0668169
	5	Corn	981	Grass Plants	Cereal	Stover	PHYLLIS		0.511892	0.0558428	0.432265		0.5136	0.308	0.1444	0.034		0.378584	0.213324	7.8e-06	0.0815018	0.163847	0.0015701	0.161165
	6	Wheat	977	Grass Plants	Cereal	Straw	PHYLLIS		0.53719	0.0602125	0.402597		0.3063	0.4159	0.1978	0.08		0.357156	0.214945	0.0044813	0.20039	0.113569	0.0516167	0.0578413
	32	Sunflower	2317	Grass Plants	Cereal	Shell	PHYLLIS		0.501057	0.0613108	0.437632		0.4709	0.3367	0.1654	0.027		0.405751	0.288566	0.0057726	0.0303093	0.171688	0.0545354	0.0433775
	44	Corn	889	Grass Plants	Cereal	Stover	PHYLLIS		0.505545	0.0631659	0.431289		0.3974	0.2743	0.1825	0.1458		0.400015	0.299281	0.0130078	0.0333084	0.155473	0.0792547	0.0196599
	45	Corn	890	Grass Plants	Cereal	Stover	PHYLLIS		0.486549	0.0622989	0.451152		0.4158	0.301	0.1735	0.1097		0.441039	0.341886	0.0071626	0.0004561	0.129078	0.0550128	0.0253658
	22	Sugarcane	Gramineae Saccharum var. 65-7052	Grass Plants	Grass	Bagasse	NREL		0.504062	0.0625911	0.433347		0.4197	0.268	0.2484	0.0639		0.401841	0.295887	0.010292	0.032612	0.161468	0.0713902	0.0265102
	23	Sugarcane	Gramineae Saccharum var. 65-7052	Grass Plants	Grass	Bagasse	NREL		0.522904	0.0585158	0.41858		0.4532	0.2659	0.2516	0.0292		0.367187	0.218989	0.0015976	0.124808	0.156584	0.0327074	0.0981275
	24	Sugarcane	Gramineae Saccharum var. 65-7052	Grass Plants	Grass	Bagasse	NREL		0.507639	0.0610088	0.431352		0.4471	0.2663	0.2522	0.0344		0.392802	0.270174	0.0054565	0.0506805	0.177049	0.0547506	0.0490876
	25	Sugarcane	Gramineae Saccharum var. 65-7052	Grass Plants	Grass	Bagasse	NREL		0.504816	0.0593593	0.435825		0.444	0.2704	0.2536	0.032		0.39577	0.259935	0.0021972	0.0480363	0.182465	0.0353634	0.0762338
	38	Sericea Lespedeza	Serala	Grass Plants	Grass	-	NREL		0.505076	0.0570748	0.43785		0.4147	0.1804	0.2608	0.144		0.392207	0.23725	0.0002338	0.0553513	0.179022	0.0110009	0.124935
	39	Sericea Lespedeza	Serala	Grass Plants	Grass	-	NREL		0.525348	0.0550537	0.419598		0.3758	0.1821	0.328	0.1141		0.358453	0.187514	0	0.140932	0.126556	0	0.186545
	40	Sericea Lespedeza	Serala	Grass Plants	Grass	-	NREL		0.520954	0.0610155	0.41803		0.3989	0.1871	0.3173	0.0966		0.37199	0.243999	0.0061336	0.103856	0.165868	0.0596669	0.0484866
	41	Sericea Lespedeza	Serala	Grass Plants	Grass	-	NREL		0.495154	0.0591117	0.445734		0.4123	0.1768	0.301	0.1099		0.414514	0.278724	0.0013896	0.0226005	0.179592	0.0259134	0.0772665
	42	Sericea Lespedeza	Serala	Grass Plants	Grass	-	NREL		0.535316	0.0604651	0.404218		0.38	0.1865	0.3543	0.0792		0.358298	0.21943	0.0051526	0.18617	0.123097	0.0551225	0.0527292
	43	Sericea Lespedeza	Serala	Grass Plants	Grass	-	NREL		0.503114	0.0602348	0.436651		0.4197	0.2043	0.3007	0.0753		0.400094	0.271885	0.0034261	0.0400112	0.179994	0.0432762	0.061313
	44	Sericea Lespedeza	Serala	Grass Plants	Grass	-	NREL		0.520062	0.0574974	0.422441		0.3925	0.2039	0.3262	0.0774		0.369226	0.214647	0.0006741	0.113953	0.158622	0.0216719	0.121206
	45	Sericea Lespedeza	Serala	Grass Plants	Grass	-	NREL		0.507773	0.0569646	0.435263		0.4123	0.2077	0.3032	0.0769		0.387323	0.231207	0.0002315	0.064535	0.176418	0.0113878	0.128898
	46	Sericea Lespedeza	Serala	Grass Plants	Grass	-	NREL		0.55388	0.0597814	0.386339		0.3738	0.199	0.3469	0.0804		0.357438	0.199647	0.0033972	0.332044	0.0104712	0.0419378	0.0550655
	47	Sericea Lespedeza	Serala	Grass Plants	Grass	-	NREL		0.533913	0.0621026	0.403985		0.376	0.2005	0.3449	0.0787		0.359533	0.234145	0.0099903	0.165464	0.132658	0.0735197	0.0246899
	48	Sericea Lespedeza	Serala	Grass Plants	Grass	-	NREL		0.542663	0.0621847	0.395152		0.3637	0.2004	0.3516	0.0842		0.355445	0.225131	0.0102804	0.22324	0.0960991	0.0731923	0.0166128
	49	Sericea Lespedeza	Serala	Grass Plants	Grass	-	NREL		0.509451	0.0564002	0.434148		0.4005	0.2077	0.3131	0.0788		0.383484	0.222707	7.71e-05	0.0718214	0.171247	0.0062896	0.144373
	50	Switchgrass	Alamo	Grass Plants	Grass	-	NREL		0.501965	0.0563874	0.441648		0.34	0.2678	0.1928	0.1994		0.397158	0.236966	2e-05	0.0469278	0.177427	0.001933	0.139569
	51	Switchgrass	Alamo	Grass Plants	Grass	-	NREL		0.503564	0.0596872	0.436749		0.3665	0.2831	0.2273	0.1232		0.39843	0.26558	0.0025901	0.0432884	0.181844	0.0379954	0.070272
	52	Switchgrass	Alamo	Grass Plants	Grass	-	NREL		0.509418	0.0601455	0.430437		0.3726	0.2901	0.2351	0.1022		0.388401	0.257218	0.0035794	0.0609521	0.179853	0.0455566	0.0644409
	53	Switchgrass	Alamo	Grass Plants	Grass	-	NREL		0.516352	0.0607663	0.422882		0.3582	0.2848	0.2253	0.1317		0.378202	0.250383	0.0054091	0.0843621	0.172935	0.0560283	0.05268
	54	Switchgrass	Alamo	Grass Plants	Grass	-	NREL		0.512156	0.0608872	0.426957		0.381	0.2918	0.2365	0.0907		0.384833	0.259502	0.0054537	0.0671579	0.176333	0.0556133	0.0511079
	55	Switchgrass	Alamo	Grass Plants	Grass	-	NREL		0.518199	0.0602657	0.421536		0.3735	0.2921	0.232	0.1024		0.37508	0.242444	0.0043423	0.0949439	0.170799	0.0510413	0.0613494
	56	Switchgrass	Alamo	Grass Plants	Grass	-	NREL		0.52574	0.0599328	0.414328		0.3735	0.3023	0.2552	0.069		0.36559	0.226855	0.0037576	0.133685	0.153906	0.0482957	0.06791
	57	Switchgrass	Alamo	Grass Plants	Grass	-	NREL		0.497547	0.0601408	0.442312		0.3722	0.2744	0.1879	0.1655		0.411123	0.283981	0.0029276	0.0254313	0.177004	0.038712	0.0608206
	58	Switchgrass	Alamo	Grass Plants	Grass	-	NREL		0.494237	0.0601671	0.445596		0.3726	0.2792	0.1801	0.1682		0.418459	0.29345	0.0028752	0.0174974	0.172661	0.0373847	0.0576728
	59	Switchgrass	Alamo	Grass Plants	Grass	-	NREL		0.496822	0.0586864	0.444492		0.3778	0.283	0.194	0.1453		0.410559	0.270677	0.0010499	0.0274953	0.181728	0.0226838	0.0858068
	60	Switchgrass	Alamo	Grass Plants	Grass	-	NREL		0.498769	0.0602719	0.440959		0.3579	0.2746	0.1849	0.1825		0.408928	0.283124	0.0033404	0.0278243	0.176943	0.0416244	0.0582154
	61	Switchgrass	Alamo	Grass Plants	Grass	-	NREL		0.502621	0.0573323	0.440047		0.3745	0.2823	0.1888	0.1545		0.397054	0.244073	0.0002777	0.0471672	0.181023	0.0116706	0.118735
	62	Switchgrass	Alamo	Grass Plants	Grass	-	NREL		0.500536	0.0596567	0.439807		0.3589	0.2767	0.1789	0.1855		0.404466	0.272581	0.0024347	0.0343465	0.180954	0.036125	0.0690924
	63	Switchgrass	Alamo	Grass Plants	Grass	-	NREL		0.496802	0.0608742	0.442324		0.3757	0.2867	0.1898	0.1478		0.414058	0.294829	0.0044512	0.0212212	0.170348	0.0471442	0.0479477
	68	Switchgrass	Kanlow	Grass Plants	Grass	-	NREL		0.51322	0.0647034	0.422077		0.3291	0.2673	0.1775	0.2261		0.387235	0.297083	0.0225071	0.0459135	0.142263	0.101111	0.0038867
	71	Switchgrass	Cave-in-Rock	Grass Plants	Grass	-	NREL		0.502655	0.0640399	0.433305		0.3406	0.3006	0.2154	0.1434		0.407289	0.316414	0.0167257	0.022218	0.138159	0.0871188	0.0120759
	72	Switchgrass	Kanlow	Grass Plants	Grass	-	NREL		0.498682	0.0640093	0.437309		0.3564	0.2742	0.1935	0.1758		0.416196	0.327907	0.0161224	0.0141088	0.129034	0.0844746	0.0121565
	73	Switchgrass	Alamo	Grass Plants	Grass	-	NREL		0.487936	0.0617169	0.450347		0.3826	0.2871	0.1701	0.1602		0.435962	0.329365	0.0056113	0.0031308	0.143457	0.0494752	0.0329981
	74	Switchgrass	Alamo	Grass Plants	Grass	-	NREL		0.485616	0.0617052	0.452679		0.3727	0.2689	0.1739	0.1845		0.441687	0.336384	0.0053325	0.000136	0.137288	0.0473596	0.0318132
	75	Switchgrass	Cave-in-Rock	Grass Plants	Grass	-	NREL		0.487071	0.0631503	0.449779		0.3874	0.2587	0.166	0.1878		0.44221	0.352918	0.0104466	5e-07	0.111935	0.0657841	0.0167058
	76	Switchgrass	Cave-in-Rock	Grass Plants	Grass	-	NREL		0.488529	0.0631164	0.448355		0.3484	0.2813	0.1867	0.1836		0.438288	0.346884	0.0102967	0.0016221	0.118837	0.0659704	0.0181004
	77	Switchgrass	Kanlow	Grass Plants	Grass	-	NREL		0.495643	0.0629668	0.44139		0.3902	0.2829	0.1864	0.1405		0.420994	0.323866	0.0109092	0.0121014	0.140583	0.0704884	0.0210579
	78	Switchgrass	Kanlow	Grass Plants	Grass	-	NREL		0.487974	0.0617322	0.450294		0.3799	0.2733	0.1874	0.1594		0.435823	0.329131	0.0056005	0.0032115	0.143685	0.0494483	0.0331005
	79	Switchgrass	Alamo	Grass Plants	Grass	-	NREL		0.487288	0.061966	0.450746		0.3691	0.2967	0.1946	0.1396		0.438274	0.335275	0.0063556	0.0018183	0.136856	0.0522761	0.0291445
	80	Switchgrass	Cave-in-Rock	Grass Plants	Grass	-	NREL		0.490735	0.0618695	0.447396		0.377	0.2927	0.1941	0.1361		0.42985	0.323799	0.0064575	0.0068103	0.147207	0.0539759	0.0319005
	81	Switchgrass	Kanlow	Grass Plants	Grass	-	NREL		0.488198	0.0623974	0.449405		0.3769	0.2594	0.1872	0.1766		0.437109	0.337995	0.0077062	0.0023434	0.132152	0.0576387	0.0250561
	83	Switchgrass	EYxFF-H	Grass Plants	Grass	-	NREL		0.492733	0.0623644	0.444902		0.3599	0.3059	0.1959	0.1383		0.426322	0.324485	0.0082747	0.0088523	0.143979	0.0613197	0.0267686
	89	Switchgrass	EYxFF-L	Grass Plants	Grass	-	NREL		0.499676	0.0639057	0.436419		0.3642	0.2913	0.1956	0.1488		0.413702	0.323673	0.0157378	0.0164148	0.133478	0.0839775	0.0130168
	91	Switchgrass	EYxFF-L	Grass Plants	Grass	-	NREL		0.497553	0.0637303	0.438717		0.3773	0.2916	0.196	0.1351		0.418023	0.327192	0.0143863	0.0132732	0.132318	0.0801522	0.0146552
	92	Switchgrass	Trailblazer	Grass Plants	Grass	-	NREL		0.50168	0.0634146	0.434905		0.3994	0.2952	0.2314	0.074		0.408269	0.311723	0.013491	0.0228677	0.146613	0.0793655	0.0176702
	93	Switchgrass	Blackwell	Grass Plants	Grass	-	NREL		0.497147	0.0635297	0.439324		0.3775	0.3016	0.1985	0.1224		0.418606	0.325967	0.0133736	0.0131677	0.134974	0.0775493	0.0163615
	94	Switchgrass	Cave-in-Rock	Grass Plants	Grass	-	NREL		0.50187	0.0630409	0.435089		0.3581	0.2944	0.1989	0.1485		0.407081	0.306308	0.0116998	0.0251681	0.153131	0.0747722	0.0218397
	95	Switchgrass	Cave-in-Rock high yield	Grass Plants	Grass	-	NREL		0.500481	0.0637752	0.435744		0.3601	0.3024	0.1978	0.1396		0.4117	0.320089	0.0153273	0.0184544	0.137207	0.0833273	0.0138959
	96	Switchgrass	EYxFF-H	Grass Plants	Grass	-	NREL		0.501341	0.06417	0.434489		0.375	0.312	0.2132	0.0997		0.410771	0.322927	0.0176528	0.0182542	0.131285	0.08861	0.0104997
	97	Switchgrass	EYxFF-H	Grass Plants	Grass	-	NREL		0.501871	0.0632817	0.434848		0.3476	0.2979	0.2064	0.1482		0.407648	0.309951	0.0130449	0.0237895	0.148578	0.0783093	0.0186797
	98	Switchgrass	EYxFF-H	Grass Plants	Grass	-	NREL		0.502062	0.0634766	0.434462		0.3788	0.3125	0.2252	0.0836		0.407701	0.31192	0.0139891	0.0232261	0.14572	0.0806939	0.0167503
	99	Switchgrass	EYxFF-L	Grass Plants	Grass	-	NREL		0.503983	0.0643753	0.431642		0.3791	0.3108	0.2264	0.0837		0.405259	0.317789	0.0192662	0.0230224	0.133295	0.0927045	0.0086637
	100	Sugarcane	Saccharum spp.	Grass Plants	Grass	Bagasse	NREL		0.503014	0.0596384	0.437348		0.4275	0.2547	0.2558	0.062		0.399346	0.265832	0.0024187	0.0419592	0.182021	0.0366355	0.0717875
	2	Tobacco	985	Grass Plants	Grass	Stalk	PHYLLIS		0.507724	0.0566426	0.435633		0.3838	0.2607	0.2444	0.111		0.386794	0.227716	0.0001092	0.0652492	0.174408	0.0074337	0.138289
	1	Hybrid Poplar	DN-34	Wood Plants	Hardwood	-	NREL		0.509264	0.0565053	0.434231		0.4252	0.1806	0.2729	0.1214		0.45609	0.156173	-5.5e-06	0.0950523	0.171456	-3.8e-06	0.121238
	2	Black Locust	Robinia pseudoacacia	Wood Plants	Hardwood	-	NREL		0.52084	0.0590547	0.420105		0.4283	0.1865	0.3029	0.0823		0.440792	0.178682	0.0452414	0.155275	0.0910998	0.0203973	0.0685117
	3	Black Locust	Robinia pseudoacacia	Wood Plants	Hardwood	-	NREL		0.515041	0.061934	0.423025		0.4596	0.1984	0.2574	0.0846		0.431654	0.207231	0.112205	0.0815109	0.103264	0.0437723	0.0203626
	4	Black Locust	Robinia pseudoacacia	Wood Plants	Hardwood	-	NREL		0.512263	0.0597692	0.427968		0.4308	0.1826	0.2763	0.1103		0.444965	0.188014	0.0536652	0.0915945	0.142412	0.0271596	0.0521909
	5	Black Locust	Robinia pseudoacacia	Wood Plants	Hardwood	-	NREL		0.514957	0.0616606	0.423382		0.4233	0.194	0.2832	0.0995		0.432966	0.205258	0.105415	0.0841546	0.107013	0.0421308	0.0230618
	6	Black Locust	Robinia pseudoacacia	Wood Plants	Hardwood	-	NREL		0.513766	0.0636943	0.42254		0.444	0.1942	0.2792	0.0825		0.424407	0.226226	0.173862	0.0462268	0.068002	0.0575819	0.0036949
	7	Eucalyptus	Saligna	Wood Plants	Hardwood	-	NREL		0.509654	0.0583308	0.432016		0.5013	0.1323	0.2806	0.0857		0.452153	0.173982	0.0247532	0.0880657	0.165934	0.0148551	0.080258
	8	Eucalyptus	Saligna	Wood Plants	Hardwood	-	NREL		0.50247	0.0590666	0.438464		0.5166	0.1481	0.2857	0.0496		0.461481	0.186428	0.0324886	0.0441749	0.193736	0.0208058	0.060886
	9	Eucalyptus	Saligna	Wood Plants	Hardwood	-	NREL		0.506343	0.0641498	0.429507		0.4884	0.148	0.2949	0.0687		0.445274	0.242694	0.161217	0.0206144	0.0662803	0.0618451	0.0020754
	11	Hybrid Poplar	Caudina, DN-34	Wood Plants	Hardwood	-	NREL		0.506723	0.0590167	0.43426		0.4503	0.2129	0.2799	0.0569		0.4546	0.182704	0.0342403	0.0664472	0.176797	0.0205204	0.0646914
	12	Hybrid Poplar	Caudina, DN-34	Wood Plants	Hardwood	-	NREL		0.513856	0.0621201	0.424024		0.4523	0.1816	0.2821	0.084		0.432811	0.210142	0.115753	0.0730679	0.104716	0.0455086	0.0180019
	13	Hybrid Poplar	Caudina, DN-34	Wood Plants	Hardwood	-	NREL		0.522157	0.0642768	0.413566		0.4468	0.1803	0.2708	0.1021		0.394088	0.217644	0.246281	0.0536307	0.0303642	0.0579215	7.09e-05
	14	Hybrid Poplar	Caudina, DN-34	Wood Plants	Hardwood	-	NREL		0.513109	0.0642778	0.422614		0.4357	0.1908	0.2972	0.0763		0.423058	0.233405	0.197091	0.0330458	0.0505094	0.062016	0.000875
	15	Hybrid Poplar	Caudina, DN-34	Wood Plants	Hardwood	-	NREL		0.508007	0.0637446	0.428249		0.4427	0.1982	0.276	0.0831		0.440913	0.234901	0.152996	0.0294353	0.0790355	0.0587012	0.0040185
	16	American Sycamore	Platanus occidentalis	Wood Plants	Hardwood	-	NREL		0.498947	0.0617036	0.43935		0.4246	0.1956	0.2651	0.1146		0.468168	0.221544	0.0759618	0.0170134	0.154131	0.0422721	0.02091
	17	American Sycamore	Platanus occidentalis	Wood Plants	Hardwood	-	NREL		0.522706	0.0597798	0.417514		0.4262	0.2023	0.2945	0.077		0.435927	0.18458	0.0630684	0.160329	0.0757171	0.0254226	0.0549568
	18	American Sycamore	Platanus occidentalis	Wood Plants	Hardwood	-	NREL		0.501522	0.0617008	0.436777		0.4593	0.1941	0.278	0.0687		0.4615	0.218396	0.0802855	0.0257189	0.150023	0.0426187	0.021458
	19	Black Locust	Robinia pseudoacacia	Wood Plants	Hardwood	-	NREL		0.493566	0.0628351	0.443599		0.4242	0.2636	0.1935	0.1188		0.485875	0.245023	0.0889663	7.6e-06	0.120469	0.0500273	0.0096311
	20	Eastern Cottonwood	(Populus Deltoides) Stoneville #66	Wood Plants	Hardwood	-	NREL		0.509858	0.0600739	0.430068		0.4668	0.1836	0.2832	0.0664		0.447355	0.192451	0.0574807	0.0753349	0.151411	0.0297259	0.0462408
	11	Ailanthus	986	Wood Plants	Hardwood	wood	PHYLLIS		0.511892	0.0641158	0.423992		0.4571	0.2604	0.2565	0.026		0.427855	0.233313	0.182938	0.0337955	0.0594028	0.0609313	0.0017646
	33	Almond	2314	Wood Plants	Hardwood	Shell	PHYLLIS		0.501571	0.0628272	0.435602		0.4943	0.2818	0.1989	0.025		0.460912	0.232726	0.107021	0.0193967	0.117866	0.0516191	0.010459
	21	Pine	Monterey (Pinus Radiata)	Wood Plants	Softwood	-	NREL		0.510876	0.0607847	0.428339		0.4469	0.2197	0.2776	0.0557		0.443522	0.199185	0.0745347	0.0742044	0.137877	0.0354798	0.0351975
	3	Spruce	Oriental 982	Wood Plants	Softwood	wood	PHYLLIS		0.524772	0.0616785	0.413549		0.4947	0.2065	0.2678	0.031		0.418642	0.198851	0.126927	0.139525	0.0539333	0.0390951	0.0230264
	12	Beech	Oriental 983	Wood Plants	Softwood	wood	PHYLLIS		0.510836	0.0639835	0.425181		0.4479	0.311	0.2142	0.027		0.431665	0.234001	0.17427	0.03264	0.0646663	0.060455	0.0023033
									0	1
																0.254921	0.256402	0.234145	0.29345	0.270677	0.294829	0.283124	0.244074	0.272581	0.297083	0.316414	0.327907	0.329365	0.336384	0.352914	0.346884	0.323866	0.329131	0.335275	0.323799	0.337995	0.324484	0.323673	0.327192	0.311723	0.325967	0.306308	0.320089	0.322927	0.309951	0.31192	0.317789	0.265832	0.227717
